# Supplementary material for: A common molecular signature of patients with sickle cell disease revealed by microarray meta-analysis and a genome-wide association study
Source: PLoS One. 2018 Jul 6;13(7):e0199461. doi: 10.1371/journal.pone.0199461 (PMC6034806; doi:10.1371/journal.pone.0199461)
Supplement: S4 Table — (XLSX) [file pone.0199461.s004.xlsx]

## Sheet: atSNP analysis
S4- The rSNPs located in the promoter region and altering TF-binding sites’ affinity identified by the atSNP R package. The first 5 columns represent the studied SNPs IDs, their chromosome location, their genomic region, the Entrez gene ID and the genes names to which they are associated. The last 5 columns contents are : Motif: The Transcription factor motif from ENCODE motif library that target…
SNP ID	Chromosome	Location	GENE ID	GENE NAME	Motif	Pval_ref	Pval_snp	Pval_rank	Pval_rank_bh
rs10920532	chr1	promoter	51094	ADIPOR1	YY1_1	2.87e-07	0.00798618	9.08e-06	0.00102056
rs16850799	chr1	promoter	51094	ADIPOR1	TCF3_2	0.0274783	0.358235	3.45e-05	0.00316971
rs10920532	chr1	promoter	51094	ADIPOR1	CHD2_disc1	0.00299495	0.0481902	9.81e-05	0.00702955
rs6666089	chr1	promoter	51094	ADIPOR1	POU3F2_2	0.0167019	0.00165409	0.000190125	0.0107392
rs6666089	chr1	promoter	51094	ADIPOR1	E2F7_1	0.00511274	0.0934477	0.000236033	0.0122971
rs10920532	chr1	promoter	51094	ADIPOR1	SP3_1	0.000360651	0.0102447	0.000262533	0.0131516
rs16850799	chr1	promoter	51094	ADIPOR1	TBX5_2	0.00490494	0.198031	0.000320501	0.0147185
rs6666089	chr1	promoter	51094	ADIPOR1	TBX15_2	0.00474647	0.803456	0.000344605	0.0153526
rs10920532	chr1	promoter	51094	ADIPOR1	ZNF143_1	0.0150005	0.190091	0.000377125	0.0161203
rs16850799	chr1	promoter	51094	ADIPOR1	T_2	0.0173979	0.235495	0.000465404	0.0177366
rs6666089	chr1	promoter	51094	ADIPOR1	TBR1_2	0.00350394	0.586184	0.000577284	0.0197543
rs16850799	chr1	promoter	51094	ADIPOR1	TBX15_2	0.0058066	0.623153	0.000593781	0.019981
rs16850809	chr1	promoter	51094	ADIPOR1	TBX21_4	0.289255	0.00320835	0.000603065	0.0199896
rs6666089	chr1	promoter	51094	ADIPOR1	TBR1_1	0.0107256	0.964094	0.00061792	0.0201502
rs10920532	chr1	promoter	51094	ADIPOR1	SPZ1_2	0.137078	0.00191954	0.000643711	0.0205553
rs16850799	chr1	promoter	51094	ADIPOR1	POU2F1_6	0.261899	0.0193419	0.000647052	0.0205553
rs16850799	chr1	promoter	51094	ADIPOR1	TBR1_1	0.00641559	0.491951	0.000680182	0.0212121
rs6666089	chr1	promoter	51094	ADIPOR1	IRF2_1	0.0135061	0.149735	0.000703198	0.0215356
rs10920532	chr1	promoter	51094	ADIPOR1	MGA_1	0.00691819	0.351654	0.000706884	0.0215357
rs16850799	chr1	promoter	51094	ADIPOR1	MYC_disc5	0.00824445	0.221009	0.00075443	0.022096
rs16850799	chr1	promoter	51094	ADIPOR1	TBX1_3	0.00347629	0.554661	0.000801728	0.0226138
rs10920532	chr1	promoter	51094	ADIPOR1	TLX2_1	0.0971167	0.00147658	0.000899461	0.0242285
rs6666089	chr1	promoter	51094	ADIPOR1	TBX1_3	0.00590175	0.592223	0.000912842	0.0242643
rs10920532	chr1	promoter	51094	ADIPOR1	SPI1_4	0.639002	0.00451061	0.000919839	0.0243625
rs16850799	chr1	promoter	51094	ADIPOR1	TBX4_1	0.00347533	0.646193	0.00106637	0.0263816
rs16850809	chr1	promoter	51094	ADIPOR1	HOXA5_1	0.0210256	0.247145	0.0010771	0.0265528
rs16850809	chr1	promoter	51094	ADIPOR1	HNF1_2	0.103859	0.00783519	0.00109455	0.0267017
rs6666089	chr1	promoter	51094	ADIPOR1	TBX21_5	0.00328014	0.183519	0.00110746	0.0268286
rs6666089	chr1	promoter	51094	ADIPOR1	PAX5_disc3	0.00242628	0.0460616	0.00113179	0.0271631
rs16850799	chr1	promoter	51094	ADIPOR1	ID4_1	0.00678186	0.295918	0.00137283	0.0298011
rs6666089	chr1	promoter	51094	ADIPOR1	EOMES_2	0.0072344	0.250422	0.00155073	0.031386
rs16850799	chr1	promoter	51094	ADIPOR1	TBX20_3	0.0108752	0.36183	0.00155876	0.0314151
rs16850809	chr1	promoter	51094	ADIPOR1	CTCFL_disc1	0.0356636	0.00135046	0.00157491	0.0315581
rs16850809	chr1	promoter	51094	ADIPOR1	GCM_1	0.002596	0.0651685	0.00159673	0.0316532
rs6666089	chr1	promoter	51094	ADIPOR1	TBX20_3	0.0153462	0.453472	0.00173626	0.032727
rs16850799	chr1	promoter	51094	ADIPOR1	TCF3_1	0.0249228	0.218674	0.00173676	0.032727
rs16850799	chr1	promoter	51094	ADIPOR1	MYOD1_1	0.00709028	0.0992817	0.00175107	0.0327943
rs6666089	chr1	promoter	51094	ADIPOR1	IKZF2_3	0.361786	0.00662384	0.00182756	0.0332778
rs6666089	chr1	promoter	51094	ADIPOR1	MGA_1	0.0119473	0.430456	0.00193253	0.0337779
rs16850799	chr1	promoter	51094	ADIPOR1	PITX2_1	0.341407	0.0160595	0.00193627	0.0337779
rs6666089	chr1	promoter	51094	ADIPOR1	TBX21_3	0.00463413	0.0841463	0.00195595	0.0337779
rs16850799	chr1	promoter	51094	ADIPOR1	E2F_disc2	0.00201917	0.0492053	0.00198011	0.0338231
rs6666089	chr1	promoter	51094	ADIPOR1	TBX21_2	0.00765839	0.310845	0.00210742	0.0344233
rs10920532	chr1	promoter	51094	ADIPOR1	POU2F2_disc2	0.0144999	0.2257	0.00214566	0.034562
rs6666089	chr1	promoter	51094	ADIPOR1	TBX20_4	0.00741103	0.337504	0.00215298	0.034562
rs16850799	chr1	promoter	51094	ADIPOR1	TBR1_2	0.0145669	0.512682	0.00215484	0.034562
rs16850809	chr1	promoter	51094	ADIPOR1	RUNX1_5	0.120906	0.00635426	0.00219068	0.0348897
rs6666089	chr1	promoter	51094	ADIPOR1	E2F1_10	0.00192277	0.0823941	0.00221846	0.0350937
rs16850799	chr1	promoter	51094	ADIPOR1	STAT_disc4	0.182461	0.0146125	0.00222505	0.0350937
rs10920532	chr1	promoter	51094	ADIPOR1	TBX21_5	0.0108893	0.352919	0.0022294	0.0350937
rs16850799	chr1	promoter	51094	ADIPOR1	CEBP_1	0.905434	0.0245181	0.00224008	0.0351522
rs16850799	chr1	promoter	51094	ADIPOR1	EOMES_2	0.0123509	0.365977	0.00228752	0.0353712
rs6666089	chr1	promoter	51094	ADIPOR1	PITX2_1	0.0163788	0.343571	0.00230777	0.035456
rs6666089	chr1	promoter	51094	ADIPOR1	USF_3	0.00766149	0.21657	0.00238032	0.0357346
rs16850799	chr1	promoter	51094	ADIPOR1	RFX1_2	0.0135416	0.360129	0.00241066	0.0357346
rs10920532	chr1	promoter	51094	ADIPOR1	TBX21_2	0.0131463	0.421656	0.00249633	0.0360368
rs6666089	chr1	promoter	51094	ADIPOR1	EOMES_1	0.0128989	0.263183	0.002508	0.0361302
rs16850799	chr1	promoter	51094	ADIPOR1	TBX21_2	0.011775	0.368806	0.00252507	0.0361562
rs16850799	chr1	promoter	51094	ADIPOR1	NKX2-1_1	0.22566	0.728995	0.00260272	0.0361562
rs10920532	chr1	promoter	51094	ADIPOR1	IRF_2	0.357949	0.0109282	0.00269799	0.0365152
rs6666089	chr1	promoter	51094	ADIPOR1	RUNX2_2	0.0576807	0.589389	0.00277662	0.0366003
rs6666089	chr1	promoter	51094	ADIPOR1	POU2F1_5	0.0650008	0.00500555	0.00294754	0.0374149
rs16850799	chr1	promoter	51094	ADIPOR1	ZEB1_2	0.0133973	0.363169	0.00302616	0.0376223
rs10920532	chr1	promoter	51094	ADIPOR1	TATA_disc5	0.0486745	0.00222832	0.0031021	0.0380021
rs16850799	chr1	promoter	51094	ADIPOR1	EOMES_1	0.00784461	0.13755	0.00323992	0.0387147
rs10920532	chr1	promoter	51094	ADIPOR1	SIN3A_disc7	0.0338549	0.632316	0.00324324	0.0387335
rs6666089	chr1	promoter	51094	ADIPOR1	E2F4_2	0.00985957	0.222862	0.00340944	0.0394205
rs6666089	chr1	promoter	51094	ADIPOR1	FOXO3_6	0.00951302	0.37708	0.00343652	0.0394205
rs6666089	chr1	promoter	51094	ADIPOR1	STAT1_2	0.0122919	0.209653	0.00343806	0.0394205
rs10920532	chr1	promoter	51094	ADIPOR1	NRF1_disc2	0.0603433	0.00395496	0.00346083	0.0394813
rs16850809	chr1	promoter	51094	ADIPOR1	RORA_3	0.212235	0.0079218	0.00349747	0.0394872
rs16850799	chr1	promoter	51094	ADIPOR1	TCF3_7	0.00988229	0.294888	0.00352259	0.0394934
rs10920532	chr1	promoter	51094	ADIPOR1	GTF2I_1	0.0495324	0.451938	0.00365584	0.0398412
rs16850799	chr1	promoter	51094	ADIPOR1	ZBTB7B_2	0.0568783	0.862051	0.0037113	0.0401641
rs16850799	chr1	promoter	51094	ADIPOR1	DMRTA2_1	0.0218897	0.573231	0.00380507	0.0404705
rs10920532	chr1	promoter	51094	ADIPOR1	TBX15_2	0.0157376	0.350756	0.00380818	0.0404705
rs16850799	chr1	promoter	51094	ADIPOR1	MYC_disc7	0.00595291	0.115668	0.00381175	0.0404705
rs10920532	chr1	promoter	51094	ADIPOR1	ZBTB16_1	0.318377	0.0369409	0.0038908	0.0408488
rs16850799	chr1	promoter	51094	ADIPOR1	PRRX2_2	0.427796	0.0376398	0.00391298	0.0409901
rs16850799	chr1	promoter	51094	ADIPOR1	PAX4_1	0.00456963	0.0959329	0.00392933	0.0410975
rs16850799	chr1	promoter	51094	ADIPOR1	TEAD3_2	0.251566	0.0106132	0.00396574	0.0412215
rs16850799	chr1	promoter	51094	ADIPOR1	TBX5_4	0.00336824	0.131582	0.00398259	0.0413033
rs10920532	chr1	promoter	51094	ADIPOR1	EOMES_2	0.0242233	0.485038	0.00416156	0.0418627
rs6666089	chr1	promoter	51094	ADIPOR1	RUNX_2	0.0643998	0.467891	0.00447253	0.0432693
rs10920532	chr1	promoter	51094	ADIPOR1	SPI1_disc1	0.0556079	0.00294133	0.00463401	0.0440749
rs10920532	chr1	promoter	51094	ADIPOR1	NANOG_disc3	0.0234884	0.829903	0.00474675	0.044421
rs16850799	chr1	promoter	51094	ADIPOR1	EGR1_1	0.0217922	0.254606	0.00476743	0.0444839
rs16850799	chr1	promoter	51094	ADIPOR1	SRY_4	0.208022	0.01843	0.00493866	0.0451681
rs6666089	chr1	promoter	51094	ADIPOR1	GATA4_1	0.0342115	0.368477	0.00495866	0.0452388
rs16850809	chr1	promoter	51094	ADIPOR1	POU2F1_1	0.31263	0.0137074	0.00501398	0.0454998
rs10920532	chr1	promoter	51094	ADIPOR1	RFX5_disc1	0.149843	0.0168985	0.00518433	0.0459182
rs6666089	chr1	promoter	51094	ADIPOR1	CTCFL_disc1	0.155129	0.60301	0.00522984	0.0459182
rs16850799	chr1	promoter	51094	ADIPOR1	NR3C1_2	0.00347497	0.0414149	0.00528381	0.0459182
rs16850799	chr1	promoter	51094	ADIPOR1	TEAD1_4	0.645889	0.024037	0.00550241	0.0464457
rs10920532	chr1	promoter	51094	ADIPOR1	TBX4_1	0.0112156	0.663957	0.00551226	0.0464629
rs10920532	chr1	promoter	51094	ADIPOR1	TBR1_2	0.0390849	0.807323	0.00559139	0.0466375
rs16850799	chr1	promoter	51094	ADIPOR1	SOX2_7	0.345926	0.0294631	0.00559267	0.0466375
rs10920532	chr1	promoter	51094	ADIPOR1	RXRA_disc4	0.322312	0.0308278	0.00565091	0.0468647
rs10920532	chr1	promoter	51094	ADIPOR1	FOXO1_5	0.00917459	0.179368	0.0056849	0.0469123
rs16850799	chr1	promoter	51094	ADIPOR1	PDX1_3	0.477354	0.0321514	0.00578227	0.0472788
rs10920532	chr1	promoter	51094	ADIPOR1	MZF1_3	0.0187149	0.338399	0.00582801	0.0473687
rs6666089	chr1	promoter	51094	ADIPOR1	POU_1	0.146285	0.00870333	0.00605955	0.0480949
rs16850799	chr1	promoter	51094	ADIPOR1	HNF4_disc3	0.176636	0.015629	0.00611891	0.0482091
rs16850799	chr1	promoter	51094	ADIPOR1	TEF_1	0.128174	0.0170269	0.00612078	0.0482091
rs16850799	chr1	promoter	51094	ADIPOR1	TCF12_disc6	0.139039	0.01283	0.00617541	0.0484287
rs10920532	chr1	promoter	51094	ADIPOR1	ELF1_1	0.0564016	0.00339273	0.00618766	0.048463
rs16850799	chr1	promoter	51094	ADIPOR1	OTX1_3	0.875541	0.0304537	0.00621518	0.0485491
rs6666089	chr1	promoter	51094	ADIPOR1	FOXC1_2	0.444186	0.0181612	0.0062551	0.0485731
rs6666089	chr1	promoter	51094	ADIPOR1	RBPJ_1	0.00024802	0.00433698	0.0063646	0.048794
rs6666089	chr1	promoter	51094	ADIPOR1	OVOL2_1	0.0184295	0.568081	0.00662207	0.0495525
rs10920532	chr1	promoter	51094	ADIPOR1	TBX2_2	0.0140139	0.277051	0.00691753	0.0504939
rs10920532	chr1	promoter	51094	ADIPOR1	TBR1_1	0.0318927	0.769759	0.00695136	0.0504939
rs10920532	chr1	promoter	51094	ADIPOR1	SIN3A_disc6	0.0459204	0.315932	0.0069815	0.0505801
rs10920532	chr1	promoter	51094	ADIPOR1	USF_5	0.0539759	0.760188	0.00698504	0.0505801
rs10920532	chr1	promoter	51094	ADIPOR1	TBX1_3	0.00890459	0.2194	0.00702603	0.0506992
rs6666089	chr1	promoter	51094	ADIPOR1	MZF1_4	0.0283844	0.598744	0.00703679	0.0507025
rs6666089	chr1	promoter	51094	ADIPOR1	HOXA3_1	0.355306	0.0143294	0.00708981	0.0508718
rs6666089	chr1	promoter	51094	ADIPOR1	GCM_1	0.0267132	0.32966	0.00720948	0.051197
rs6666089	chr1	promoter	51094	ADIPOR1	HIC2_1	0.02295	0.772857	0.00722378	0.0512001
rs10920532	chr1	promoter	51094	ADIPOR1	TBX20_4	0.0210353	0.448036	0.00723053	0.0512124
rs6666089	chr1	promoter	51094	ADIPOR1	DMRT1_1	0.200264	0.0223269	0.00727477	0.0512149
rs10920532	chr1	promoter	51094	ADIPOR1	NFE2L2_3	0.173207	0.0119976	0.0073073	0.0512169
rs6666089	chr1	promoter	51094	ADIPOR1	TBX4_1	0.0176953	0.913316	0.00733718	0.0512787
rs16850799	chr1	promoter	51094	ADIPOR1	SOX17_4	0.180891	0.0101146	0.00747216	0.0515655
rs6666089	chr1	promoter	51094	ADIPOR1	ETS_disc6	0.205874	0.0171977	0.00772143	0.0522604
rs16850809	chr1	promoter	51094	ADIPOR1	BCL_disc9	0.0463094	0.445688	0.00779414	0.0524319
rs10920532	chr1	promoter	51094	ADIPOR1	HDAC2_disc3	0.0211832	0.161673	0.00785151	0.0526175
rs10920532	chr1	promoter	51094	ADIPOR1	TFAP2_2	0.0939556	0.55935	0.00807425	0.0530347
rs6666089	chr1	promoter	51094	ADIPOR1	TCF12_disc4	0.0384863	0.501188	0.00817711	0.0534097
rs10920532	chr1	promoter	51094	ADIPOR1	GATA4_1	0.426949	0.0476657	0.0082105	0.0534097
rs6666089	chr1	promoter	51094	ADIPOR1	RAD21_disc3	0.0186312	0.15328	0.00831362	0.0535053
rs10920532	chr1	promoter	51094	ADIPOR1	RBPJ_1	0.117317	0.00914253	0.00832649	0.0535361
rs6666089	chr1	promoter	51094	ADIPOR1	TBX5_4	0.00956932	0.206179	0.00841396	0.0536999
rs10920532	chr1	promoter	51094	ADIPOR1	EP300_disc10	0.202193	0.0161196	0.00841485	0.0536999
rs10920532	chr1	promoter	51094	ADIPOR1	ESRRA_disc4	0.0641947	0.422731	0.00842046	0.0536999
rs16850799	chr1	promoter	51094	ADIPOR1	RARA_8	0.0347151	0.443008	0.00842962	0.0537273
rs16850799	chr1	promoter	51094	ADIPOR1	SMC3_disc4	0.0107204	0.193223	0.00855374	0.0538856
rs16850799	chr1	promoter	51094	ADIPOR1	SOX21_1	0.274283	0.0324802	0.00856148	0.0539006
rs10920532	chr1	promoter	51094	ADIPOR1	MAZ_1	0.00227746	0.0391953	0.00863696	0.0541085
rs16850799	chr1	promoter	51094	ADIPOR1	POU5F1_3	0.541039	0.063852	0.00886672	0.0546872
rs10920532	chr1	promoter	51094	ADIPOR1	CCNT2_disc1	0.0701123	0.763633	0.00903278	0.0551735
rs16850799	chr1	promoter	51094	ADIPOR1	TCF12_disc1	0.0131916	0.488192	0.00909045	0.0552969
rs6666089	chr1	promoter	51094	ADIPOR1	PBX1_1	0.563555	0.0371396	0.00925746	0.0554727
rs10920532	chr1	promoter	51094	ADIPOR1	OVOL2_1	0.0270312	0.693689	0.00945795	0.0558299
rs6666089	chr1	promoter	51094	ADIPOR1	CLOCK_1	0.0462296	0.866213	0.00950887	0.0559464
rs6666089	chr1	promoter	51094	ADIPOR1	SPIC_1	0.922555	0.0631734	0.00960217	0.056051
rs16850799	chr1	promoter	51094	ADIPOR1	CHD2_disc3	0.0799466	0.538817	0.00966124	0.056132
rs10920532	chr1	promoter	51094	ADIPOR1	TBX5_3	0.00641915	0.0623932	0.00968188	0.0561832
rs16850799	chr1	promoter	51094	ADIPOR1	REST_1	0.135711	0.0173925	0.00971951	0.0561915
rs16850799	chr1	promoter	51094	ADIPOR1	SOX1_2	0.276094	0.0221234	0.00993614	0.0564572
rs6666089	chr1	promoter	51094	ADIPOR1	E2F1_11	0.0259058	0.295146	0.0101276	0.0567855
rs16850809	chr1	promoter	51094	ADIPOR1	ZNF410_1	0.00920376	0.168285	0.0101645	0.0569016
rs16850799	chr1	promoter	51094	ADIPOR1	SMC3_disc1	0.0899788	0.874714	0.0102079	0.0569726
rs16850799	chr1	promoter	51094	ADIPOR1	SOX7_3	0.443225	0.0323673	0.0104197	0.0572349
rs16850799	chr1	promoter	51094	ADIPOR1	SOX14_1	0.356494	0.0385873	0.0106078	0.0576529
rs16850799	chr1	promoter	51094	ADIPOR1	TBX20_2	0.0762314	0.518705	0.0106762	0.0576996
rs10920532	chr1	promoter	51094	ADIPOR1	TBX5_4	0.0127708	0.236385	0.0107497	0.0576996
rs10920532	chr1	promoter	51094	ADIPOR1	ESRRA_1	0.0208899	0.276623	0.010765	0.0576996
rs6666089	chr1	promoter	51094	ADIPOR1	NKX2-5_3	0.017421	0.210952	0.0109568	0.0577522
rs16850799	chr1	promoter	51094	ADIPOR1	SOX3_1	0.106077	0.0148315	0.0110159	0.0579151
rs16850799	chr1	promoter	51094	ADIPOR1	TAL1_1	0.0646308	0.496463	0.0110683	0.0580057
rs10920532	chr1	promoter	51094	ADIPOR1	YY1_disc5	0.0847574	0.486177	0.011109	0.0580473
rs10920532	chr1	promoter	51094	ADIPOR1	E4F1_1	0.0994707	0.588693	0.0115446	0.0590077
rs10920532	chr1	promoter	51094	ADIPOR1	GABP_1	0.414937	0.0529748	0.0118403	0.0593809
rs16850799	chr1	promoter	51094	ADIPOR1	VDR_1	0.0747763	0.666079	0.0119229	0.0595551
rs10920532	chr1	promoter	51094	ADIPOR1	IKZF1_1	0.567328	0.0589879	0.0120835	0.0599636
rs6666089	chr1	promoter	51094	ADIPOR1	E2F1_19	0.0589194	0.499603	0.0122386	0.0602329
rs16850799	chr1	promoter	51094	ADIPOR1	RHOXF1_7	0.00271462	0.0396	0.0123002	0.0604048
rs16850799	chr1	promoter	51094	ADIPOR1	RXRG_2	0.0823093	0.737344	0.0124865	0.0605303
rs16850809	chr1	promoter	51094	ADIPOR1	NFIC_4	0.029479	0.36667	0.0125417	0.060557
rs16850809	chr1	promoter	51094	ADIPOR1	RUNX1_7	0.044464	0.512233	0.012663	0.0606388
rs16850809	chr1	promoter	51094	ADIPOR1	IRF7_1	0.741041	0.0741161	0.012692	0.060697
rs16850809	chr1	promoter	51094	ADIPOR1	TAL1_4	0.100171	0.00973965	0.0127626	0.0606997
rs16850799	chr1	promoter	51094	ADIPOR1	TBX21_5	0.035172	0.477713	0.01284	0.0607488
rs16850799	chr1	promoter	51094	ADIPOR1	SOX21_2	0.266947	0.0410566	0.0128447	0.0607488
rs16850799	chr1	promoter	51094	ADIPOR1	TEAD3_1	0.398196	0.0501504	0.0128455	0.0607488
rs16850799	chr1	promoter	51094	ADIPOR1	POU5F1_1	0.433978	0.0370265	0.0131807	0.0612097
rs16850799	chr1	promoter	51094	ADIPOR1	TBX2_2	0.00985788	0.134722	0.0134847	0.0616444
rs6666089	chr1	promoter	51094	ADIPOR1	TBX21_6	0.0103578	0.0825039	0.0135422	0.061733
rs16850809	chr1	promoter	51094	ADIPOR1	ZNF354C_1	0.0322101	0.547592	0.0135497	0.061733
rs6666089	chr1	promoter	51094	ADIPOR1	MYC_1	0.0181008	0.386559	0.0136958	0.0619026
rs10920532	chr1	promoter	51094	ADIPOR1	TCF12_disc4	0.31821	0.0314908	0.0137078	0.0619026
rs6666089	chr1	promoter	51094	ADIPOR1	PRDM1_2	0.0236161	0.170143	0.0137091	0.0619026
rs16850799	chr1	promoter	51094	ADIPOR1	SREBF2_1	0.0424576	0.468842	0.0137298	0.0619367
rs6666089	chr1	promoter	51094	ADIPOR1	EGR1_4	0.0276804	0.185185	0.0138385	0.0620393
rs16850799	chr1	promoter	51094	ADIPOR1	BRCA1_1	0.0554885	0.91691	0.0139821	0.0621238
rs16850799	chr1	promoter	51094	ADIPOR1	ETS_disc9	0.0723247	0.816207	0.0139908	0.0621238
rs10920532	chr1	promoter	51094	ADIPOR1	SP2_disc3	0.120642	0.509311	0.0140794	0.0621238
rs10920532	chr1	promoter	51094	ADIPOR1	TBX20_3	0.0622213	0.703318	0.0141498	0.0621634
rs16850799	chr1	promoter	51094	ADIPOR1	NR2C2_disc1	0.309306	0.0378472	0.0141643	0.0622029
rs16850809	chr1	promoter	51094	ADIPOR1	SOX9_5	0.021159	0.123914	0.0141742	0.0622093
rs10920532	chr1	promoter	51094	ADIPOR1	ZNF143_2	0.0563469	0.681285	0.0141782	0.0622102
rs16850799	chr1	promoter	51094	ADIPOR1	ASCL2_1	0.0567135	0.397919	0.0142396	0.0623481
rs10920532	chr1	promoter	51094	ADIPOR1	PAX4_3	0.0622993	0.846765	0.014287	0.0624206
rs6666089	chr1	promoter	51094	ADIPOR1	SP2_disc3	0.210517	0.58997	0.0144284	0.0625561
rs10920532	chr1	promoter	51094	ADIPOR1	EOMES_1	0.0651208	0.483033	0.0144339	0.0625672
rs10920532	chr1	promoter	51094	ADIPOR1	IRF1_2	0.240727	0.012882	0.0144833	0.062591
rs10920532	chr1	promoter	51094	ADIPOR1	BATF3_1	0.118945	0.734989	0.0144849	0.062591
rs10920532	chr1	promoter	51094	ADIPOR1	HERPUD1_1	0.114748	0.0156914	0.0144972	0.062591
rs6666089	chr1	promoter	51094	ADIPOR1	HMX3_1	0.00331304	0.0336525	0.0146883	0.0627665
rs6666089	chr1	promoter	51094	ADIPOR1	HES5_1	0.0611617	0.462059	0.0148373	0.0629108
rs16850799	chr1	promoter	51094	ADIPOR1	NHLH1_3	0.0615305	0.596225	0.0149677	0.0630659
rs10920532	chr1	promoter	51094	ADIPOR1	CACBP_1	0.15555	0.581792	0.0150119	0.0630849
rs6666089	chr1	promoter	51094	ADIPOR1	ZBTB33_1	0.301079	0.0280988	0.0150702	0.0631859
rs10920532	chr1	promoter	51094	ADIPOR1	CHD2_disc3	0.12463	0.585133	0.0151484	0.0632978
rs16850799	chr1	promoter	51094	ADIPOR1	CREB_1	0.0227738	0.573094	0.0151632	0.0632978
rs10920532	chr1	promoter	51094	ADIPOR1	ARID5B_1	0.548577	0.056705	0.0152483	0.0633884
rs6666089	chr1	promoter	51094	ADIPOR1	E2F1_12	0.0129649	0.224221	0.0156758	0.0636756
rs6666089	chr1	promoter	51094	ADIPOR1	PAX4_3	0.0673924	0.86745	0.0157072	0.0637794
rs16850799	chr1	promoter	51094	ADIPOR1	SOX2_1	0.142089	0.0219747	0.0157723	0.0638386
rs6666089	chr1	promoter	51094	ADIPOR1	SP1_disc2	0.131957	0.641186	0.0159238	0.0639784
rs10920532	chr1	promoter	51094	ADIPOR1	SP1_disc2	0.611472	0.168394	0.0159995	0.0641313
rs16850799	chr1	promoter	51094	ADIPOR1	SRY_1	0.0497147	0.860387	0.0160553	0.0641691
rs16850799	chr1	promoter	51094	ADIPOR1	TCF3_3	0.0301894	0.265214	0.0161189	0.0641978
rs10920532	chr1	promoter	51094	ADIPOR1	SPIB_2	0.0458293	0.00535691	0.0161221	0.0641978
rs6666089	chr1	promoter	51094	ADIPOR1	CACBP_1	0.134796	0.479804	0.0165907	0.0648673
rs6666089	chr1	promoter	51094	ADIPOR1	RUNX3_2	0.112146	0.87262	0.0166608	0.0649635
rs16850799	chr1	promoter	51094	ADIPOR1	SREBF1_4	0.0351495	0.402803	0.0167797	0.0651454
rs6666089	chr1	promoter	51094	ADIPOR1	TATA_disc5	0.0486745	0.388529	0.016891	0.0652128
rs16850799	chr1	promoter	51094	ADIPOR1	SRY_5	0.233491	0.0485315	0.017165	0.0655293
rs6666089	chr1	promoter	51094	ADIPOR1	HEY2_2	0.0472032	0.78876	0.0172188	0.0655293
rs16850799	chr1	promoter	51094	ADIPOR1	MNT_1	0.0557021	0.659658	0.0172396	0.0655293
rs16850809	chr1	promoter	51094	ADIPOR1	BCL_disc8	0.161095	0.550565	0.0174067	0.0656994
rs16850809	chr1	promoter	51094	ADIPOR1	CACBP_1	0.17725	0.62089	0.017565	0.0657613
rs10920532	chr1	promoter	51094	ADIPOR1	EGR1_1	0.503499	0.106294	0.0176554	0.0657613
rs10920532	chr1	promoter	51094	ADIPOR1	MTF1_3	0.0470698	0.609869	0.0177318	0.0657613
rs10920532	chr1	promoter	51094	ADIPOR1	AP1_disc5	0.0124881	0.20297	0.0177493	0.0657613
rs16850799	chr1	promoter	51094	ADIPOR1	TFAP4_4	0.0281625	0.33588	0.017921	0.065788
rs10920532	chr1	promoter	51094	ADIPOR1	ELF1_disc3	0.126531	0.581877	0.0179452	0.065788
rs16850799	chr1	promoter	51094	ADIPOR1	GMEB2_2	0.0399307	0.660495	0.0179461	0.065788
rs6666089	chr1	promoter	51094	ADIPOR1	E2F1_21	0.0880469	0.693125	0.0179896	0.0658279
rs10920532	chr1	promoter	51094	ADIPOR1	REST_1	0.0167637	0.099103	0.0180937	0.0659905
rs10920532	chr1	promoter	51094	ADIPOR1	WT1_1	0.127245	0.730643	0.0181065	0.0659905
rs16850799	chr1	promoter	51094	ADIPOR1	ZNF354C_1	0.020446	0.312077	0.0181604	0.0660024
rs6666089	chr1	promoter	51094	ADIPOR1	MYC_4	0.0585911	0.638167	0.0181773	0.0660024
rs16850799	chr1	promoter	51094	ADIPOR1	TFAP4_6	0.0374432	0.243262	0.0183061	0.0661913
rs6666089	chr1	promoter	51094	ADIPOR1	TBX5_3	0.0161411	0.126451	0.0188433	0.0667744
rs6666089	chr1	promoter	51094	ADIPOR1	IKZF2_2	0.0241262	0.197979	0.0189182	0.0669142
rs16850799	chr1	promoter	51094	ADIPOR1	GSC2_1	0.445247	0.0367953	0.0190343	0.0669937
rs6666089	chr1	promoter	51094	ADIPOR1	MESP1_1	0.0505002	0.452428	0.0192696	0.0672285
rs10920532	chr1	promoter	51094	ADIPOR1	IRF_1	0.801873	0.146878	0.0193215	0.0672533
rs10920532	chr1	promoter	51094	ADIPOR1	ATF4_3	0.668568	0.0992944	0.0193778	0.0673568
rs10920532	chr1	promoter	51094	ADIPOR1	TBX4_2	0.0953608	0.509275	0.0194839	0.0674545
rs16850809	chr1	promoter	51094	ADIPOR1	RREB1_2	0.465786	0.144905	0.0196651	0.06749
rs6666089	chr1	promoter	51094	ADIPOR1	POU3F3_1	0.0899602	0.0140678	0.0197169	0.06749
rs6666089	chr1	promoter	51094	ADIPOR1	POU2F1_4	0.333407	0.058989	0.0197184	0.06749
rs16850809	chr1	promoter	51094	ADIPOR1	SOX2_7	0.563071	0.0745261	0.0199083	0.0677419
rs16850799	chr1	promoter	51094	ADIPOR1	MAX_4	0.0269074	0.250563	0.0199259	0.0677419
rs6666089	chr1	promoter	51094	ADIPOR1	E2F4_1	0.0138673	0.211698	0.0201676	0.0678752
rs10920532	chr1	promoter	51094	ADIPOR1	TAL1_disc2	0.207346	0.0177751	0.0202106	0.0679064
rs10920532	chr1	promoter	51094	ADIPOR1	ZNF281_1	0.0620066	0.3464	0.0202356	0.0679387
rs16850799	chr1	promoter	51094	ADIPOR1	RHOXF1_1	0.0163234	0.145117	0.0203548	0.0680219
rs16850809	chr1	promoter	51094	ADIPOR1	GCM1_1	0.0819497	0.729349	0.0203617	0.0680219
rs6666089	chr1	promoter	51094	ADIPOR1	E2F3_3	0.167599	0.679987	0.0203901	0.0680301
rs16850799	chr1	promoter	51094	ADIPOR1	TBX1_1	0.103485	0.565618	0.0205655	0.0681074
rs16850799	chr1	promoter	51094	ADIPOR1	PITX1_3	0.468421	0.0381659	0.0205928	0.0681074
rs16850809	chr1	promoter	51094	ADIPOR1	ZNF143_2	0.256067	0.0374363	0.020595	0.0681074
rs16850799	chr1	promoter	51094	ADIPOR1	DPRX_1	0.852429	0.0677461	0.0206832	0.0682005
rs16850799	chr1	promoter	51094	ADIPOR1	TBX4_2	0.141715	0.738019	0.0209006	0.0684499
rs16850799	chr1	promoter	51094	ADIPOR1	OBOX1_1	0.441145	0.0652978	0.0209643	0.0684895
rs6666089	chr1	promoter	51094	ADIPOR1	IRF2_2	0.029125	0.268142	0.0210632	0.0684895
rs6666089	chr1	promoter	51094	ADIPOR1	HNF4_4	0.161198	0.631642	0.0211558	0.068542
rs16850809	chr1	promoter	51094	ADIPOR1	BRCA1_2	0.0297589	0.389184	0.0211569	0.068542
rs16850799	chr1	promoter	51094	ADIPOR1	ZNF8_1	0.601623	0.0647999	0.0211613	0.068542
rs16850799	chr1	promoter	51094	ADIPOR1	PAX4_8	0.940449	0.111771	0.0212039	0.068624
rs10920532	chr1	promoter	51094	ADIPOR1	STAT1_2	0.439799	0.043997	0.0212881	0.0686514
rs16850799	chr1	promoter	51094	ADIPOR1	SOX21_4	0.143411	0.0163895	0.0213746	0.0687598
rs6666089	chr1	promoter	51094	ADIPOR1	TBX2_2	0.0327089	0.352039	0.0214849	0.068847
rs16850799	chr1	promoter	51094	ADIPOR1	POU5F1_2	0.266884	0.0398261	0.0216067	0.0689358
rs6666089	chr1	promoter	51094	ADIPOR1	NR1H4_1	0.144561	0.50564	0.0217225	0.0691493
rs10920532	chr1	promoter	51094	ADIPOR1	VENTX_1	0.814235	0.114758	0.0217496	0.0691493
rs10920532	chr1	promoter	51094	ADIPOR1	CTCF_disc9	0.229951	0.715427	0.0217534	0.0691493
rs16850799	chr1	promoter	51094	ADIPOR1	TGIF1_1	0.0583295	0.417487	0.0218261	0.0692467
rs6666089	chr1	promoter	51094	ADIPOR1	POU3F3_3	0.0701051	0.00909529	0.0218351	0.0692488
rs16850799	chr1	promoter	51094	ADIPOR1	GCM1_3	0.046413	0.28037	0.0218556	0.0692488
rs6666089	chr1	promoter	51094	ADIPOR1	E2F1_7	0.0475787	0.44825	0.0221716	0.069425
rs6666089	chr1	promoter	51094	ADIPOR1	FOXG1_1	0.119269	0.0184484	0.0223105	0.0695485
rs16850809	chr1	promoter	51094	ADIPOR1	SOX2_5	0.224446	0.0277768	0.0223776	0.0696297
rs16850809	chr1	promoter	51094	ADIPOR1	PAX5_3	0.0778598	0.516226	0.0225683	0.0698833
rs16850799	chr1	promoter	51094	ADIPOR1	RFX5_disc1	0.0336246	0.206202	0.0226022	0.069933
rs10920532	chr1	promoter	51094	ADIPOR1	ETV6_1	0.217422	0.0316031	0.0227571	0.0700151
rs16850799	chr1	promoter	51094	ADIPOR1	TBX5_3	0.0766548	0.492262	0.0227936	0.0700151
rs6666089	chr1	promoter	51094	ADIPOR1	RUNX2_6	0.0865591	0.625613	0.0230751	0.0701778
rs6666089	chr1	promoter	51094	ADIPOR1	E2F1_22	0.117127	0.808682	0.0232428	0.0702934
rs6666089	chr1	promoter	51094	ADIPOR1	BCL_disc4	0.00408662	0.0475969	0.0232798	0.070336
rs6666089	chr1	promoter	51094	ADIPOR1	E2F1_18	0.0883249	0.657831	0.0233098	0.0703553
rs10920532	chr1	promoter	51094	ADIPOR1	ETS_disc3	0.0113726	0.11231	0.0234173	0.0705067
rs6666089	chr1	promoter	51094	ADIPOR1	MZF1_1	0.0734525	0.400469	0.023569	0.0706159
rs6666089	chr1	promoter	51094	ADIPOR1	EGR1_3	0.0343657	0.170659	0.023576	0.0706159
rs6666089	chr1	promoter	51094	ADIPOR1	ETV6_1	0.0291748	0.190061	0.0236743	0.0707131
rs16850809	chr1	promoter	51094	ADIPOR1	NR4A2_1	0.568211	0.0327429	0.0237225	0.0707808
rs16850799	chr1	promoter	51094	ADIPOR1	TFCP2_1	0.0491374	0.232623	0.0237399	0.070804
rs16850799	chr1	promoter	51094	ADIPOR1	BCL_disc8	0.208629	0.594506	0.0238225	0.0708211
rs16850799	chr1	promoter	51094	ADIPOR1	DMRTA1_1	0.0756807	0.831836	0.0238922	0.0708858
rs6666089	chr1	promoter	51094	ADIPOR1	MEF2A_3	0.373718	0.0802452	0.023935	0.0709367
rs16850809	chr1	promoter	51094	ADIPOR1	ATF4_2	0.0481369	0.527113	0.0242739	0.0713435
rs16850799	chr1	promoter	51094	ADIPOR1	CTCF_disc7	0.0423236	0.25203	0.0244121	0.0713847
rs6666089	chr1	promoter	51094	ADIPOR1	DMRT2_1	0.195234	0.039377	0.0245698	0.0716041
rs16850809	chr1	promoter	51094	ADIPOR1	CEBPG_1	0.345093	0.0592356	0.0247404	0.0716758
rs6666089	chr1	promoter	51094	ADIPOR1	IRF8_3	0.0333038	0.371667	0.0247509	0.0716758
rs16850799	chr1	promoter	51094	ADIPOR1	GLI2_1	0.104644	0.673324	0.0249223	0.0717967
rs16850809	chr1	promoter	51094	ADIPOR1	MYOD1_1	0.0713374	0.357481	0.0249563	0.0718666
rs10920532	chr1	promoter	51094	ADIPOR1	GATA5_1	0.312401	0.037088	0.0251052	0.0720143
rs16850799	chr1	promoter	51094	ADIPOR1	MEOX2_2	0.406706	0.0850479	0.0251914	0.0720681
rs10920532	chr1	promoter	51094	ADIPOR1	NFATC2_1	0.664982	0.0659322	0.0252087	0.0720785
rs16850799	chr1	promoter	51094	ADIPOR1	SMC3_disc2	0.0112401	0.0675241	0.0252777	0.0720785
rs16850799	chr1	promoter	51094	ADIPOR1	TFEC_1	0.0988429	0.659741	0.0253831	0.0721925
rs10920532	chr1	promoter	51094	ADIPOR1	STAT_1	0.00583802	0.0361704	0.0253979	0.0722107
rs10920532	chr1	promoter	51094	ADIPOR1	TGIF1_1	0.0677648	0.462379	0.0254362	0.0722118
rs16850809	chr1	promoter	51094	ADIPOR1	FOXL1_4	0.051675	0.724635	0.0255199	0.0722129
rs16850809	chr1	promoter	51094	ADIPOR1	ELF2_1	0.0215369	0.145168	0.0257089	0.0723598
rs16850799	chr1	promoter	51094	ADIPOR1	HOXB6_1	0.631304	0.0962723	0.0257145	0.0723653
rs10920532	chr1	promoter	51094	ADIPOR1	RAD21_disc7	0.180004	0.567423	0.0257671	0.0724398
rs16850799	chr1	promoter	51094	ADIPOR1	TFAP2C_6	0.113522	0.644748	0.0258745	0.0724748
rs10920532	chr1	promoter	51094	ADIPOR1	PAX5_disc3	0.185912	0.0291328	0.0259696	0.0725669
rs10920532	chr1	promoter	51094	ADIPOR1	E2F2_4	0.519675	0.127077	0.0260007	0.0725979
rs6666089	chr1	promoter	51094	ADIPOR1	SP1_6	0.0475044	0.250217	0.026069	0.0726165
rs10920532	chr1	promoter	51094	ADIPOR1	NR1H_1	0.134419	0.604483	0.0260973	0.0726486
rs16850799	chr1	promoter	51094	ADIPOR1	MYF6_1	0.0500142	0.362614	0.0261392	0.0727011
rs16850799	chr1	promoter	51094	ADIPOR1	ZBTB18_3	0.045148	0.362002	0.0261427	0.0727018
rs16850799	chr1	promoter	51094	ADIPOR1	CCDC6_1	0.787141	0.144065	0.0263543	0.0727683
rs16850799	chr1	promoter	51094	ADIPOR1	USF_2	0.0557566	0.328633	0.0264271	0.0728304
rs6666089	chr1	promoter	51094	ADIPOR1	ZBED1_1	0.095726	0.89124	0.0264538	0.0728304
rs16850809	chr1	promoter	51094	ADIPOR1	ZNF281_1	0.134886	0.605208	0.0265424	0.0729323
rs10920532	chr1	promoter	51094	ADIPOR1	NFE2L1_1	0.0947696	0.651841	0.0266074	0.0730129
rs16850799	chr1	promoter	51094	ADIPOR1	TFAP2A_9	0.152055	0.90094	0.0267786	0.0732286
rs16850799	chr1	promoter	51094	ADIPOR1	STAT4_1	0.641017	0.0856629	0.0269158	0.0733684
rs6666089	chr1	promoter	51094	ADIPOR1	IKZF1_1	0.00105542	0.00798438	0.0269813	0.0734201
rs16850809	chr1	promoter	51094	ADIPOR1	NFIC_2	0.0313778	0.174984	0.0270091	0.0734254
rs10920532	chr1	promoter	51094	ADIPOR1	GATA1_6	0.0320166	0.309596	0.0271398	0.0735262
rs6666089	chr1	promoter	51094	ADIPOR1	RARG_4	0.114689	0.619309	0.0272041	0.0736643
rs16850799	chr1	promoter	51094	ADIPOR1	NFKB_3	0.654	0.17624	0.0273185	0.0737914
rs10920532	chr1	promoter	51094	ADIPOR1	FOXD1_2	0.0393639	0.243153	0.0275223	0.0738997
rs16850799	chr1	promoter	51094	ADIPOR1	TCF4_1	0.0128142	0.124849	0.0277464	0.0741801
rs16850799	chr1	promoter	51094	ADIPOR1	TAL1_5	0.136901	0.68224	0.0278659	0.0743015
rs6666089	chr1	promoter	51094	ADIPOR1	E2F1_14	0.109933	0.609982	0.027885	0.0743015
rs16850809	chr1	promoter	51094	ADIPOR1	FOXO1_4	0.335519	0.0680025	0.0279943	0.0743315
rs16850799	chr1	promoter	51094	ADIPOR1	OTX2_3	0.565616	0.0652136	0.0280059	0.0743445
rs16850799	chr1	promoter	51094	ADIPOR1	GSC_2	0.415836	0.0503816	0.0280151	0.0743502
rs16850809	chr1	promoter	51094	ADIPOR1	EGR1_1	0.221845	0.771109	0.0282647	0.0745265
rs16850799	chr1	promoter	51094	ADIPOR1	MTF1_3	0.540423	0.0742156	0.0282963	0.0745363
rs16850799	chr1	promoter	51094	ADIPOR1	NR4A2_3	0.423269	0.0627499	0.0283839	0.0745703
rs10920532	chr1	promoter	51094	ADIPOR1	PBX_1	0.0834063	0.623246	0.0285495	0.0745893
rs16850809	chr1	promoter	51094	ADIPOR1	RUNX1_6	0.531702	0.0806582	0.0286704	0.0746208
rs10920532	chr1	promoter	51094	ADIPOR1	BARHL2_4	0.323814	0.0593411	0.028724	0.074642
rs16850809	chr1	promoter	51094	ADIPOR1	TCF12_disc5	0.0757229	0.48864	0.0288367	0.0746876
rs16850799	chr1	promoter	51094	ADIPOR1	TEAD4_1	0.926302	0.107348	0.0290486	0.0748514
rs16850809	chr1	promoter	51094	ADIPOR1	ATF3_1	0.316249	0.048622	0.0290894	0.0748602
rs10920532	chr1	promoter	51094	ADIPOR1	STAT1_3	0.976304	0.0927111	0.0291412	0.0748913
rs16850799	chr1	promoter	51094	ADIPOR1	PAX5_3	0.105987	0.572836	0.0292791	0.0749646
rs6666089	chr1	promoter	51094	ADIPOR1	USF_5	0.150865	0.981682	0.029351	0.0750222
rs10920532	chr1	promoter	51094	ADIPOR1	NFIB_1	0.0821019	0.350992	0.0295043	0.0751765
rs16850799	chr1	promoter	51094	ADIPOR1	SOX10_5	0.275784	0.0765177	0.0295352	0.0752207
rs10920532	chr1	promoter	51094	ADIPOR1	SPIC_2	0.0178624	0.00320507	0.0295713	0.0752507
rs16850799	chr1	promoter	51094	ADIPOR1	PITX1_4	0.342793	0.0295006	0.0296796	0.0753086
rs16850799	chr1	promoter	51094	ADIPOR1	TBX5_5	0.134977	0.680107	0.0297093	0.0753297
rs16850809	chr1	promoter	51094	ADIPOR1	MGA_2	0.163656	0.0307005	0.0300526	0.0756202
rs16850799	chr1	promoter	51094	ADIPOR1	HIC1_4	0.109088	0.0201208	0.0307964	0.0763171
rs10920532	chr1	promoter	51094	ADIPOR1	TBX5_5	0.112463	0.554227	0.0308727	0.076387
rs10920532	chr1	promoter	51094	ADIPOR1	EHF_1	0.114898	0.0186307	0.0309153	0.0764066
rs16850799	chr1	promoter	51094	ADIPOR1	SIX6_1	0.158923	0.0274757	0.0310712	0.076493
rs16850799	chr1	promoter	51094	ADIPOR1	RAD21_disc3	0.0823699	0.456974	0.0311068	0.0765275
rs16850799	chr1	promoter	51094	ADIPOR1	SOX8_7	0.185784	0.0375948	0.0311214	0.0765275
rs6666089	chr1	promoter	51094	ADIPOR1	RUNX1_7	0.0681837	0.512233	0.0311692	0.0765275
rs6666089	chr1	promoter	51094	ADIPOR1	RBPJ_2	0.00125987	0.0117476	0.0311717	0.0765275
rs10920532	chr1	promoter	51094	ADIPOR1	RUNX1_4	0.549337	0.133129	0.0313987	0.0767548
rs10920532	chr1	promoter	51094	ADIPOR1	STAT_disc6	0.0504587	0.30256	0.0314575	0.0768035
rs6666089	chr1	promoter	51094	ADIPOR1	MYCN_2	0.0878409	0.708268	0.031475	0.0768319
rs10920532	chr1	promoter	51094	ADIPOR1	NKX2-5_1	0.605847	0.0876147	0.0316259	0.0769717
rs6666089	chr1	promoter	51094	ADIPOR1	NFKB_5	0.171256	0.690662	0.0317034	0.0769964
rs6666089	chr1	promoter	51094	ADIPOR1	STAT_disc6	0.149549	0.0250347	0.0317247	0.0770238
rs16850809	chr1	promoter	51094	ADIPOR1	YY2_1	0.0178812	0.148353	0.0322567	0.077419
rs16850799	chr1	promoter	51094	ADIPOR1	SOX10_6	0.793233	0.233012	0.0323549	0.0774671
rs16850809	chr1	promoter	51094	ADIPOR1	CRX_1	0.929137	0.153769	0.0324022	0.0774671
rs10920532	chr1	promoter	51094	ADIPOR1	GATA_3	0.121573	0.769129	0.0324823	0.0775445
rs16850799	chr1	promoter	51094	ADIPOR1	PITX1_2	0.332806	0.0395058	0.0328244	0.0776339
rs16850799	chr1	promoter	51094	ADIPOR1	ZEB1_4	0.106767	0.770169	0.0328247	0.0776339
rs16850799	chr1	promoter	51094	ADIPOR1	RFX7_1	0.071779	0.5155	0.0329039	0.0776339
rs6666089	chr1	promoter	51094	ADIPOR1	PKNOX2_3	0.0642199	0.287822	0.0329897	0.0776339
rs16850799	chr1	promoter	51094	ADIPOR1	BCL_disc9	0.195801	0.629265	0.0332232	0.0778304
rs10920532	chr1	promoter	51094	ADIPOR1	PDX1_3	0.666548	0.0888116	0.0332243	0.0778304
rs6666089	chr1	promoter	51094	ADIPOR1	NR2F2_1	0.0120591	0.0787057	0.0333296	0.077904
rs16850799	chr1	promoter	51094	ADIPOR1	HMGA1_1	0.277289	0.0329746	0.0334634	0.0779806
rs16850799	chr1	promoter	51094	ADIPOR1	SIX1_1	0.230315	0.0452174	0.0335491	0.0779807
rs6666089	chr1	promoter	51094	ADIPOR1	ARNT_3	0.0463162	0.37578	0.0336594	0.0780813
rs10920532	chr1	promoter	51094	ADIPOR1	TATA_disc10	0.155761	0.78912	0.0336809	0.0781038
rs16850799	chr1	promoter	51094	ADIPOR1	FIGLA_1	0.00883108	0.070779	0.0337451	0.0781169
rs16850799	chr1	promoter	51094	ADIPOR1	TFE3_1	0.106737	0.756322	0.0337701	0.0781169
rs16850799	chr1	promoter	51094	ADIPOR1	RELA_2	0.260666	0.0561804	0.0337784	0.0781169
rs10920532	chr1	promoter	51094	ADIPOR1	EGR1_disc5	0.202384	0.712001	0.0338715	0.0781631
rs10920532	chr1	promoter	51094	ADIPOR1	TAL1_disc1	0.0939371	0.449343	0.0340755	0.0781631
rs16850799	chr1	promoter	51094	ADIPOR1	SOX8_9	0.245427	0.0654037	0.0341295	0.0782082
rs10920532	chr1	promoter	51094	ADIPOR1	BARHL1_4	0.285468	0.0559903	0.0341811	0.0782675
rs16850809	chr1	promoter	51094	ADIPOR1	RXRA_disc5	0.531008	0.0866248	0.0341832	0.0782675
rs16850799	chr1	promoter	51094	ADIPOR1	BRCA1_2	0.0734201	0.709856	0.0341886	0.0782675
rs16850809	chr1	promoter	51094	ADIPOR1	INSM1_1	0.62351	0.130928	0.0342336	0.0783058
rs16850799	chr1	promoter	51094	ADIPOR1	AR_1	0.331343	0.0795653	0.0342919	0.0783583
rs16850809	chr1	promoter	51094	ADIPOR1	EGR_2	0.128483	0.500504	0.0344819	0.078495
rs6666089	chr1	promoter	51094	ADIPOR1	ELF3_2	0.140505	0.841149	0.0346068	0.078567
rs6666089	chr1	promoter	51094	ADIPOR1	SP4_1	0.0234701	0.127068	0.0347623	0.078654
rs10920532	chr1	promoter	51094	ADIPOR1	MGA_3	0.116611	0.52761	0.034866	0.0787317
rs16850799	chr1	promoter	51094	ADIPOR1	PITX3_2	0.344165	0.0439354	0.0348836	0.0787317
rs16850809	chr1	promoter	51094	ADIPOR1	ZNF740_4	0.0931059	0.425679	0.0350596	0.078811
rs16850799	chr1	promoter	51094	ADIPOR1	ZBTB7A_disc2	0.0988629	0.57098	0.0351027	0.0788506
rs10920532	chr1	promoter	51094	ADIPOR1	FOXO4_5	0.0736726	0.287389	0.0351379	0.0788526
rs16850809	chr1	promoter	51094	ADIPOR1	HNF1_1	0.750198	0.192097	0.035169	0.0788826
rs16850799	chr1	promoter	51094	ADIPOR1	PKNOX2_3	0.0915735	0.395631	0.0351698	0.0788826
rs16850799	chr1	promoter	51094	ADIPOR1	RAD21_disc6	0.201767	0.64926	0.035206	0.078924
rs10920532	chr1	promoter	51094	ADIPOR1	FOXD1_1	0.438401	0.0709658	0.035461	0.0790483
rs6666089	chr1	promoter	51094	ADIPOR1	NKX2-3_3	0.00814773	0.0721199	0.036039	0.079369
rs6666089	chr1	promoter	51094	ADIPOR1	AHR::ARNT::HIF1A_1	0.0180096	0.428333	0.0361028	0.0794147
rs16850809	chr1	promoter	51094	ADIPOR1	YY2_2	0.01262	0.0914522	0.036119	0.0794188
rs10920532	chr1	promoter	51094	ADIPOR1	NKX2-2_1	0.683422	0.130294	0.0362344	0.0794894
rs6666089	chr1	promoter	51094	ADIPOR1	HNF1_3	0.204883	0.04353	0.0362519	0.0794894
rs16850809	chr1	promoter	51094	ADIPOR1	ELF5_1	0.088464	0.85676	0.0362716	0.0794894
rs10920532	chr1	promoter	51094	ADIPOR1	NOBOX_1	0.817825	0.157091	0.0364497	0.0795607
rs6666089	chr1	promoter	51094	ADIPOR1	MAX_5	0.119629	0.87358	0.0364727	0.0795607
rs6666089	chr1	promoter	51094	ADIPOR1	MEIS3_5	0.0297159	0.148417	0.0364886	0.0795652
rs6666089	chr1	promoter	51094	ADIPOR1	REST_3	0.066056	0.334574	0.0366198	0.0796431
rs16850799	chr1	promoter	51094	ADIPOR1	ASCL2_2	0.0386135	0.259497	0.0367015	0.0796431
rs6666089	chr1	promoter	51094	ADIPOR1	PBX_1	0.0748155	0.515814	0.0367378	0.0796431
rs16850799	chr1	promoter	51094	ADIPOR1	STAT5A_3	0.557684	0.0689771	0.0369209	0.0797875
rs16850809	chr1	promoter	51094	ADIPOR1	ZNF740_2	0.104853	0.50111	0.0371156	0.0799275
rs16850799	chr1	promoter	51094	ADIPOR1	NR3C1_disc1	0.991543	0.183445	0.0371528	0.0799612
rs10920532	chr1	promoter	51094	ADIPOR1	GATA_disc1	0.356373	0.0486629	0.0371649	0.0799633
rs6666089	chr1	promoter	51094	ADIPOR1	TCF4_2	0.0971075	0.719086	0.0372064	0.0799758
rs16850799	chr1	promoter	51094	ADIPOR1	TCF12_disc5	0.101277	0.567399	0.0372533	0.0799884
rs6666089	chr1	promoter	51094	ADIPOR1	ZNF740_2	0.112956	0.504886	0.0372912	0.0800021
rs6666089	chr1	promoter	51094	ADIPOR1	HOXD10_1	0.0103644	0.0429713	0.0373296	0.0800431
rs6666089	chr1	promoter	51094	ADIPOR1	ZNF282_1	0.0335966	0.1446	0.037419	0.0800668
rs16850809	chr1	promoter	51094	ADIPOR1	GCM2_1	0.0726201	0.657686	0.0374489	0.0800777
rs10920532	chr1	promoter	51094	ADIPOR1	ELF3_1	0.0864736	0.0137797	0.0375083	0.0801186
rs16850799	chr1	promoter	51094	ADIPOR1	OTX1_5	0.322597	0.0364984	0.0375175	0.0801305
rs16850809	chr1	promoter	51094	ADIPOR1	NFIX_1	0.103678	0.468372	0.0375877	0.0801799
rs6666089	chr1	promoter	51094	ADIPOR1	CLOCK::ARNTL_1	0.0341474	0.264305	0.0377297	0.0802425
rs6666089	chr1	promoter	51094	ADIPOR1	MEF2A_1	0.389455	0.10193	0.0377391	0.0802425
rs10920532	chr1	promoter	51094	ADIPOR1	E2F1_22	0.16865	0.692093	0.0379022	0.0802425
rs16850809	chr1	promoter	51094	ADIPOR1	AHR_1	0.377352	0.10258	0.0379172	0.0802425
rs16850799	chr1	promoter	51094	ADIPOR1	TATA_disc9	0.516383	0.0814523	0.037918	0.0802425
rs16850799	chr1	promoter	51094	ADIPOR1	SOX1_4	0.297627	0.0359086	0.0380436	0.080259
rs10920532	chr1	promoter	51094	ADIPOR1	NFIA_1	0.0872695	0.452092	0.0380663	0.0802672
rs16850799	chr1	promoter	51094	ADIPOR1	TBX5_1	0.0852482	0.628852	0.0383664	0.0803231
rs10920532	chr1	promoter	51094	ADIPOR1	SMC3_disc3	0.153067	0.570927	0.0384371	0.0803717
rs16850809	chr1	promoter	51094	ADIPOR1	MGA_3	0.0191454	0.00435887	0.0385463	0.0804397
rs10920532	chr1	promoter	51094	ADIPOR1	T_3	0.0592173	0.280534	0.0385913	0.0804427
rs10920532	chr1	promoter	51094	ADIPOR1	HOXA3_1	0.316148	0.0447305	0.0387486	0.0804631
rs10920532	chr1	promoter	51094	ADIPOR1	STAT5A_2	0.613432	0.146152	0.0388788	0.0805395
rs16850799	chr1	promoter	51094	ADIPOR1	PITX3_1	0.91574	0.159601	0.0390892	0.0806864
rs6666089	chr1	promoter	51094	ADIPOR1	ZBTB7B_2	0.123367	0.640454	0.0391552	0.0806864
rs16850799	chr1	promoter	51094	ADIPOR1	ARID3A_1	0.495315	0.087283	0.039179	0.0806881
rs16850799	chr1	promoter	51094	ADIPOR1	TBX1_2	0.128827	0.506262	0.039264	0.0806881
rs6666089	chr1	promoter	51094	ADIPOR1	TBX1_2	0.0467155	0.183077	0.0393276	0.0807145
rs16850799	chr1	promoter	51094	ADIPOR1	HLF_2	0.0326164	0.296471	0.0393575	0.0807424
rs16850809	chr1	promoter	51094	ADIPOR1	SOX7_4	0.126806	0.569852	0.0396897	0.0809782
rs6666089	chr1	promoter	51094	ADIPOR1	CENPB_1	0.289124	0.0464283	0.0396907	0.0809782
rs16850809	chr1	promoter	51094	ADIPOR1	MZF1_2	0.108428	0.505389	0.0397232	0.0809863
rs10920532	chr1	promoter	51094	ADIPOR1	CREB_1	0.0435823	0.722953	0.0397733	0.0809863
rs10920532	chr1	promoter	51094	ADIPOR1	YY2_2	0.0148711	0.0979475	0.0399533	0.0810276
rs16850799	chr1	promoter	51094	ADIPOR1	TCF3_5	0.0649359	0.440425	0.0399956	0.0810446
rs16850799	chr1	promoter	51094	ADIPOR1	SOX15_3	0.322146	0.0523719	0.04011	0.0810767
rs10920532	chr1	promoter	51094	ADIPOR1	TBX1_2	0.151901	0.58498	0.0401688	0.0810767
rs16850799	chr1	promoter	51094	ADIPOR1	EP300_disc9	0.229423	0.656933	0.0404191	0.0812599
rs10920532	chr1	promoter	51094	ADIPOR1	SOX_1	0.0659882	0.340507	0.0404662	0.0812849
rs16850809	chr1	promoter	51094	ADIPOR1	BHLHE40_2	0.59272	0.137465	0.040534	0.0813003
rs16850799	chr1	promoter	51094	ADIPOR1	SPIB_1	0.887807	0.107758	0.0405933	0.0813028
rs16850799	chr1	promoter	51094	ADIPOR1	HNF1_2	0.438864	0.0968179	0.0407161	0.0813291
rs6666089	chr1	promoter	51094	ADIPOR1	EGR1_7	0.248443	0.929977	0.0407559	0.0813291
rs16850809	chr1	promoter	51094	ADIPOR1	CTCF_2	0.0947737	0.0222167	0.0409969	0.0813291
rs16850809	chr1	promoter	51094	ADIPOR1	GLI_1	0.164489	0.762899	0.0410533	0.0813291
rs16850799	chr1	promoter	51094	ADIPOR1	NKX6-1_1	0.582854	0.131926	0.0410578	0.0813291
rs10920532	chr1	promoter	51094	ADIPOR1	CACD_2	0.166493	0.752236	0.0410683	0.0813291
rs16850799	chr1	promoter	51094	ADIPOR1	ESRRA_1	0.1486	0.854093	0.0411328	0.0813402
rs16850809	chr1	promoter	51094	ADIPOR1	KLF16_1	0.149011	0.893311	0.0413442	0.0814162
rs10920532	chr1	promoter	51094	ADIPOR1	ZNF740_2	0.0803095	0.311482	0.0413485	0.0814162
rs6666089	chr1	promoter	51094	ADIPOR1	NKX2-3_2	0.00937628	0.0673714	0.0417566	0.0815975
rs6666089	chr1	promoter	51094	ADIPOR1	ZBTB7B_1	0.2243	0.800288	0.0417749	0.0815975
rs6666089	chr1	promoter	51094	ADIPOR1	LHX6_5	0.152049	0.826294	0.0419694	0.0817386
rs16850799	chr1	promoter	51094	ADIPOR1	TAL1_disc2	0.607902	0.0731386	0.0420491	0.081784
rs6666089	chr1	promoter	51094	ADIPOR1	EGR1_5	0.0243131	0.118468	0.0421148	0.081784
rs6666089	chr1	promoter	51094	ADIPOR1	RXRA_4	0.1457	0.65298	0.0421204	0.081784
rs16850799	chr1	promoter	51094	ADIPOR1	RAD21_disc8	0.34873	0.807173	0.0422995	0.0818614
rs6666089	chr1	promoter	51094	ADIPOR1	EP300_disc10	0.109322	0.0202639	0.0424533	0.0819317
rs16850799	chr1	promoter	51094	ADIPOR1	MYC_4	0.148374	0.959228	0.0427594	0.0820717
rs10920532	chr1	promoter	51094	ADIPOR1	BARHL1_3	0.710183	0.10697	0.0428686	0.0821696
rs16850809	chr1	promoter	51094	ADIPOR1	SOX14_1	0.549694	0.133893	0.0434136	0.0824977
rs10920532	chr1	promoter	51094	ADIPOR1	ZBTB33_disc2	0.145595	0.77324	0.0434223	0.0825072
rs6666089	chr1	promoter	51094	ADIPOR1	CTCF_disc9	0.359474	0.845173	0.0435108	0.0825237
rs6666089	chr1	promoter	51094	ADIPOR1	HOMEZ_2	0.593229	0.107579	0.0436523	0.0826681
rs10920532	chr1	promoter	51094	ADIPOR1	NKX3-2_3	0.178964	0.0244517	0.0436626	0.0826723
rs16850799	chr1	promoter	51094	ADIPOR1	ZNF143_1	0.0646429	0.358827	0.0439862	0.0827726
rs6666089	chr1	promoter	51094	ADIPOR1	FOXO1_5	0.184994	0.82096	0.0439925	0.0827726
rs6666089	chr1	promoter	51094	ADIPOR1	NFKB_3	0.205839	0.684722	0.044086	0.0827871
rs16850809	chr1	promoter	51094	ADIPOR1	BARX1_3	0.88302	0.164797	0.0440995	0.0827871
rs10920532	chr1	promoter	51094	ADIPOR1	EGR_1	0.0348112	0.123597	0.0441068	0.0827895
rs10920532	chr1	promoter	51094	ADIPOR1	SRY_8	0.872182	0.2371	0.0442104	0.0828128
rs16850809	chr1	promoter	51094	ADIPOR1	GCM1_2	0.0815559	0.603993	0.0443644	0.0828896
rs16850809	chr1	promoter	51094	ADIPOR1	SOX1_3	0.554568	0.111042	0.0443885	0.0828896
rs16850809	chr1	promoter	51094	ADIPOR1	HLF_1	0.193528	0.0249703	0.0445111	0.0829163
rs6666089	chr1	promoter	51094	ADIPOR1	E2F1_4	0.120534	0.596956	0.0447668	0.0829788
rs6666089	chr1	promoter	51094	ADIPOR1	EGR4_2	0.0876085	0.377139	0.0448623	0.083083
rs16850799	chr1	promoter	51094	ADIPOR1	MLXIPL_1	0.0598541	0.410588	0.0450465	0.0831888
rs16850799	chr1	promoter	51094	ADIPOR1	TFAP4_5	0.0521003	0.302482	0.0450675	0.0831888
rs6666089	chr1	promoter	51094	ADIPOR1	ITGB2_1	0.115081	0.640677	0.045397	0.0833414
rs16850809	chr1	promoter	51094	ADIPOR1	MYOD1_2	0.459495	0.0725659	0.0454341	0.0833445
rs16850809	chr1	promoter	51094	ADIPOR1	YY1_disc4	0.238482	0.696472	0.0454794	0.0833445
rs16850799	chr1	promoter	51094	ADIPOR1	SOX10_2	0.0820225	0.738422	0.0454876	0.0833445
rs16850809	chr1	promoter	51094	ADIPOR1	ZNF143_1	0.0835021	0.436632	0.0455098	0.0833445
rs16850799	chr1	promoter	51094	ADIPOR1	BBX_1	0.156263	0.0386796	0.0456677	0.0833889
rs10920532	chr1	promoter	51094	ADIPOR1	BARHL2_6	0.751599	0.135051	0.0458253	0.0835259
rs16850809	chr1	promoter	51094	ADIPOR1	PAX8_1	0.149833	0.682051	0.0458825	0.0835676
rs10920532	chr1	promoter	51094	ADIPOR1	GATA3_1	0.0579511	0.462203	0.0460054	0.0836304
rs16850809	chr1	promoter	51094	ADIPOR1	EBOX_1	0.965865	0.157126	0.046091	0.0836662
rs10920532	chr1	promoter	51094	ADIPOR1	ZNF740_4	0.0973237	0.380463	0.0460969	0.0836662
rs10920532	chr1	promoter	51094	ADIPOR1	BDP1_disc3	0.154396	0.525403	0.0461896	0.0836662
rs6666089	chr1	promoter	51094	ADIPOR1	NKX3-1_5	0.00498453	0.0341893	0.0463008	0.0837352
rs10920532	chr1	promoter	51094	ADIPOR1	BARX1_3	0.670687	0.125775	0.0463054	0.0837352
rs6666089	chr1	promoter	51094	ADIPOR1	RUNX3_4	0.147283	0.866777	0.0467615	0.0840485
rs6666089	chr1	promoter	51094	ADIPOR1	EGR1_disc4	0.662475	0.19742	0.0467786	0.0840653
rs10920532	chr1	promoter	51094	ADIPOR1	FOXJ3_4	0.235959	0.0481578	0.0468482	0.0841019
rs6666089	chr1	promoter	51094	ADIPOR1	E2F1_9	0.204883	0.787615	0.0469958	0.0841388
rs10920532	chr1	promoter	51094	ADIPOR1	CPEB1_1	0.211153	0.0413511	0.0470479	0.0841501
rs6666089	chr1	promoter	51094	ADIPOR1	TFEC_1	0.166987	0.825388	0.0473788	0.0843159
rs16850809	chr1	promoter	51094	ADIPOR1	MAF_disc2	0.0198603	0.0910994	0.0473896	0.0843159
rs10920532	chr1	promoter	51094	ADIPOR1	RFX5_2	0.0363915	0.00835331	0.0474638	0.0843387
rs16850799	chr1	promoter	51094	ADIPOR1	IKZF2_1	0.876477	0.177721	0.0475089	0.0843623
rs6666089	chr1	promoter	51094	ADIPOR1	ZNF143_2	0.217461	0.875066	0.0478956	0.0845204
rs16850809	chr1	promoter	51094	ADIPOR1	FOXA_disc2	0.0609552	0.306606	0.0479593	0.0845204
rs6666089	chr1	promoter	51094	ADIPOR1	GTF2I_1	0.490518	0.0929179	0.0480542	0.0845515
rs16850799	chr1	promoter	51094	ADIPOR1	IRF1_3	0.570582	0.127505	0.0483183	0.0846028
rs6666089	chr1	promoter	51094	ADIPOR1	MEIS3_3	0.0302555	0.153532	0.0483545	0.0846178
rs16850799	chr1	promoter	51094	ADIPOR1	SIX6_3	0.427566	0.0860798	0.0483844	0.0846178
rs16850809	chr1	promoter	51094	ADIPOR1	HMGA1_2	0.405236	0.102218	0.0484361	0.0846566
rs16850799	chr1	promoter	51094	ADIPOR1	EGR3_1	0.142081	0.652916	0.0484761	0.0846629
rs16850799	chr1	promoter	51094	ADIPOR1	MYCN_1	0.131496	0.679018	0.0485738	0.0847402
rs16850799	chr1	promoter	51094	ADIPOR1	DMBX1_2	0.421056	0.0606884	0.048633	0.0847683
rs16850799	chr1	promoter	51094	ADIPOR1	T_1	0.107167	0.494025	0.0486956	0.0847836
rs6666089	chr1	promoter	51094	ADIPOR1	T_1	0.160745	0.0351232	0.0486956	0.0847836
rs16850809	chr1	promoter	51094	ADIPOR1	TP53_1	0.10338	0.290785	0.048845	0.0848773
rs16850799	chr1	promoter	51094	ADIPOR1	PAX5_1	0.117125	0.374586	0.0488497	0.0848773
rs10920532	chr1	promoter	51094	ADIPOR1	TBX2_1	0.0826195	0.324074	0.0489218	0.0848773
rs16850799	chr1	promoter	51094	ADIPOR1	RHOXF1_2	0.060319	0.256677	0.0490246	0.0849493
rs16850799	chr1	promoter	51094	ADIPOR1	HIC2_1	0.389406	0.0574419	0.0490694	0.0849545
rs16850809	chr1	promoter	51094	ADIPOR1	IRF2_1	0.557456	0.156398	0.0491033	0.0849808
rs16850799	chr1	promoter	51094	ADIPOR1	TFCP2_5	0.151374	0.0339186	0.0491369	0.0849991
rs10920532	chr1	promoter	51094	ADIPOR1	NRF1_2	0.188698	0.957461	0.0492501	0.0850477
rs16850809	chr1	promoter	51094	ADIPOR1	MEIS1_3	0.289494	0.0638154	0.049255	0.0850477
rs10920532	chr1	promoter	51094	ADIPOR1	ISX_4	0.825954	0.166385	0.0493144	0.0850604
rs16850799	chr1	promoter	51094	ADIPOR1	MYF6_2	0.0109177	0.0586133	0.0493836	0.0850866
rs16850809	chr1	promoter	51094	ADIPOR1	PKNOX2_3	0.389306	0.104839	0.0495426	0.085184
rs16850799	chr1	promoter	51094	ADIPOR1	BHLHE40_4	0.100389	0.641634	0.0495757	0.0851992
rs6666089	chr1	promoter	51094	ADIPOR1	ETV4_1	0.512232	0.0951653	0.0496659	0.0852059
rs16850799	chr1	promoter	51094	ADIPOR1	WT1_1	0.179138	0.877918	0.0497082	0.0852172
rs16850799	chr1	promoter	51094	ADIPOR1	EGR1_disc1	0.138052	0.52567	0.0498099	0.0852597
rs6666089	chr1	promoter	51094	ADIPOR1	POU6F1_2	0.754275	0.209975	0.0498346	0.0852597
rs6666089	chr1	promoter	51094	ADIPOR1	POU3F1_3	0.039783	0.00954141	0.0498438	0.0852597
rs10920532	chr1	promoter	51094	ADIPOR1	NR2F6_4	0.091203	0.301727	0.0501858	0.0854117
rs6666089	chr1	promoter	51094	ADIPOR1	NKX3-2_3	0.00585893	0.0385222	0.0504099	0.085531
rs10920532	chr1	promoter	51094	ADIPOR1	MYC_disc9	0.22629	0.695336	0.0504266	0.085531
rs6666089	chr1	promoter	51094	ADIPOR1	POU3F2_5	0.0169464	0.00379609	0.0504929	0.085531
rs10920532	chr1	promoter	51094	ADIPOR1	GATA3_3	0.413705	0.101504	0.0506597	0.0856226
rs16850809	chr1	promoter	51094	ADIPOR1	SRY_2	0.23108	0.0643664	0.0507869	0.0856649
rs16850799	chr1	promoter	51094	ADIPOR1	HEY1_disc2	0.296326	0.669128	0.0509611	0.0858011
rs10920532	chr1	promoter	51094	ADIPOR1	ELF3_2	0.0938874	0.019247	0.0514068	0.0858487
rs6666089	chr1	promoter	51094	ADIPOR1	OSR2_1	0.184183	0.0302464	0.0515045	0.0859231
rs16850799	chr1	promoter	51094	ADIPOR1	MSX2_4	0.976642	0.16813	0.0516939	0.0859701
rs16850799	chr1	promoter	51094	ADIPOR1	HES1_1	0.121688	0.611751	0.0518058	0.0860657
rs10920532	chr1	promoter	51094	ADIPOR1	HNF1_1	0.741031	0.21984	0.0518298	0.0860657
rs6666089	chr1	promoter	51094	ADIPOR1	PAX_1	0.0120367	0.0723065	0.0520799	0.0861807
rs6666089	chr1	promoter	51094	ADIPOR1	MEIS2_4	0.0279965	0.136887	0.0521425	0.0862296
rs16850799	chr1	promoter	51094	ADIPOR1	ELK1_1	0.650554	0.133013	0.0522501	0.0862409
rs16850799	chr1	promoter	51094	ADIPOR1	EGR4_1	0.285785	0.820114	0.0523418	0.0863109
rs10920532	chr1	promoter	51094	ADIPOR1	HES1_1	0.147066	0.738558	0.0523768	0.0863109
rs10920532	chr1	promoter	51094	ADIPOR1	TBX20_2	0.167862	0.70664	0.0524962	0.0863786
rs16850809	chr1	promoter	51094	ADIPOR1	NFIB_1	0.181351	0.625847	0.0525483	0.0863787
rs16850799	chr1	promoter	51094	ADIPOR1	SIN3A_disc4	0.0794746	0.400486	0.0525927	0.0863896
rs6666089	chr1	promoter	51094	ADIPOR1	PDX1_3	0.76501	0.141277	0.0528451	0.0864996
rs6666089	chr1	promoter	51094	ADIPOR1	AIRE_2	0.275007	0.66371	0.0529898	0.0865458
rs16850799	chr1	promoter	51094	ADIPOR1	EGR1_disc3	0.144586	0.586312	0.0531866	0.0866764
rs10920532	chr1	promoter	51094	ADIPOR1	SREBF1_3	0.0357588	0.312984	0.0536372	0.0867584
rs16850799	chr1	promoter	51094	ADIPOR1	SREBF1_3	0.0357588	0.312984	0.0536372	0.0867584
rs6666089	chr1	promoter	51094	ADIPOR1	E2F1_15	0.20599	0.797802	0.0536911	0.0868107
rs16850799	chr1	promoter	51094	ADIPOR1	SOX2_4	0.413128	0.0949293	0.053748	0.0868321
rs16850799	chr1	promoter	51094	ADIPOR1	SOX1_1	0.657107	0.18682	0.0538514	0.0868321
rs6666089	chr1	promoter	51094	ADIPOR1	TBX2_1	0.201839	0.711029	0.0539444	0.086871
rs10920532	chr1	promoter	51094	ADIPOR1	BACH2_1	0.118741	0.629041	0.0539888	0.086871
rs6666089	chr1	promoter	51094	ADIPOR1	E2F1_1	0.0339588	0.218076	0.054016	0.086871
rs10920532	chr1	promoter	51094	ADIPOR1	EHF_2	0.0956623	0.0210088	0.0540271	0.0868711
rs16850799	chr1	promoter	51094	ADIPOR1	ATF3_disc2	0.219541	0.760653	0.0540573	0.0868711
rs16850799	chr1	promoter	51094	ADIPOR1	TFAP4_2	0.0865882	0.519005	0.0542674	0.0869683
rs10920532	chr1	promoter	51094	ADIPOR1	IRF8_3	0.742039	0.145828	0.0543417	0.0870143
rs16850809	chr1	promoter	51094	ADIPOR1	PBX1_3	0.00181755	0.00973886	0.0547202	0.0872542
rs16850799	chr1	promoter	51094	ADIPOR1	SOX2_5	0.577296	0.110621	0.0547487	0.0872542
rs10920532	chr1	promoter	51094	ADIPOR1	SOX7_2	0.110439	0.413444	0.0548676	0.0873519
rs6666089	chr1	promoter	51094	ADIPOR1	HOXD8_2	0.504011	0.110806	0.0549122	0.0873853
rs10920532	chr1	promoter	51094	ADIPOR1	NFE2_disc1	0.683255	0.113117	0.0550535	0.0874099
rs10920532	chr1	promoter	51094	ADIPOR1	NKX3-1_5	0.112201	0.0183899	0.0551163	0.0874099
rs10920532	chr1	promoter	51094	ADIPOR1	NR2E1::NFIC_1	0.0458835	0.26946	0.0551344	0.0874176
rs10920532	chr1	promoter	51094	ADIPOR1	SOX17_2	0.181113	0.771449	0.0554247	0.0875561
rs16850799	chr1	promoter	51094	ADIPOR1	SOX10_3	0.229803	0.0657905	0.0554691	0.0875759
rs16850799	chr1	promoter	51094	ADIPOR1	BHLHE41_1	0.131308	0.736009	0.0556047	0.0876298
rs10920532	chr1	promoter	51094	ADIPOR1	INSM1_1	0.617475	0.203696	0.0557127	0.0876596
rs16850799	chr1	promoter	51094	ADIPOR1	VDR_2	0.192498	0.997081	0.0557305	0.0876596
rs6666089	chr1	promoter	51094	ADIPOR1	E2F1_3	0.110685	0.60559	0.0557987	0.0876751
rs16850809	chr1	promoter	51094	ADIPOR1	HOXD13_2	0.777096	0.172772	0.0559903	0.0877295
rs16850799	chr1	promoter	51094	ADIPOR1	SREBF1_1	0.10914	0.597101	0.056009	0.0877381
rs16850799	chr1	promoter	51094	ADIPOR1	TAL1_2	0.0733051	0.471509	0.056059	0.08775
rs10920532	chr1	promoter	51094	ADIPOR1	GATA6_2	0.263388	0.0575635	0.0562417	0.0878807
rs16850799	chr1	promoter	51094	ADIPOR1	NR4A2_2	0.52128	0.134778	0.0563631	0.0879069
rs6666089	chr1	promoter	51094	ADIPOR1	E2F_disc3	0.0359377	0.171677	0.0563947	0.0879069
rs6666089	chr1	promoter	51094	ADIPOR1	EGR1_disc1	0.170331	0.596961	0.0564053	0.0879069
rs10920532	chr1	promoter	51094	ADIPOR1	PKNOX2_1	0.130319	0.597925	0.0565752	0.0879904
rs16850799	chr1	promoter	51094	ADIPOR1	ELF1_disc3	0.241458	0.662254	0.0565806	0.0879904
rs16850809	chr1	promoter	51094	ADIPOR1	HLF_4	0.266637	0.0526529	0.056647	0.0880442
rs6666089	chr1	promoter	51094	ADIPOR1	OBOX2_1	0.0128314	0.0442409	0.0568098	0.0880808
rs10920532	chr1	promoter	51094	ADIPOR1	USF_3	0.161381	0.76669	0.056839	0.0880905
rs16850799	chr1	promoter	51094	ADIPOR1	GSC_1	0.873507	0.204721	0.0568766	0.0880916
rs6666089	chr1	promoter	51094	ADIPOR1	HAND1_1	0.194265	0.810771	0.0571152	0.0882156
rs16850799	chr1	promoter	51094	ADIPOR1	RFX2_4	0.097781	0.391872	0.05714	0.0882156
rs6666089	chr1	promoter	51094	ADIPOR1	CREB3L1_3	0.00247993	0.0135525	0.0572834	0.0882773
rs16850809	chr1	promoter	51094	ADIPOR1	ZNF740_1	0.165811	0.540514	0.0573119	0.0882865
rs10920532	chr1	promoter	51094	ADIPOR1	TBP_3	0.813297	0.17018	0.057623	0.0883717
rs6666089	chr1	promoter	51094	ADIPOR1	NFKB1_3	0.211593	0.719142	0.0577857	0.0883957
rs16850809	chr1	promoter	51094	ADIPOR1	HINFP_3	0.206255	0.539479	0.0578396	0.0884206
rs10920532	chr1	promoter	51094	ADIPOR1	BARHL2_7	0.398724	0.101826	0.0579606	0.0885065
rs16850809	chr1	promoter	51094	ADIPOR1	YY1_4	0.243234	0.0460495	0.0580082	0.0885065
rs6666089	chr1	promoter	51094	ADIPOR1	TGIF2_2	0.0534672	0.23379	0.0582307	0.0885267
rs10920532	chr1	promoter	51094	ADIPOR1	TBX15_1	0.0572941	0.224864	0.0582646	0.0885267
rs16850809	chr1	promoter	51094	ADIPOR1	GLIS2_2	0.138684	0.52865	0.0583927	0.0885427
rs6666089	chr1	promoter	51094	ADIPOR1	POU6F1_3	0.694201	0.152788	0.0584355	0.0885734
rs16850809	chr1	promoter	51094	ADIPOR1	REST_disc5	0.225093	0.695213	0.0585149	0.0886164
rs6666089	chr1	promoter	51094	ADIPOR1	ZNF354C_1	0.10957	0.698375	0.058658	0.0886605
rs16850799	chr1	promoter	51094	ADIPOR1	RHOXF1_6	0.502176	0.0764223	0.0587712	0.0886754
rs16850809	chr1	promoter	51094	ADIPOR1	GABPA_3	0.167078	0.9292	0.0588023	0.0886771
rs16850799	chr1	promoter	51094	ADIPOR1	SIX2_1	0.160726	0.037932	0.0588296	0.0886771
rs16850799	chr1	promoter	51094	ADIPOR1	USF2_1	0.0691428	0.481626	0.0588599	0.0886771
rs6666089	chr1	promoter	51094	ADIPOR1	HMBOX1_2	0.543737	0.108492	0.0591076	0.0887701
rs10920532	chr1	promoter	51094	ADIPOR1	NR3C1_disc3	0.0363155	0.549729	0.0591761	0.0887938
rs16850799	chr1	promoter	51094	ADIPOR1	HEY2_2	0.0356617	0.200661	0.0591785	0.0887938
rs16850799	chr1	promoter	51094	ADIPOR1	OBOX5_2	0.845778	0.212089	0.0592932	0.0888366
rs10920532	chr1	promoter	51094	ADIPOR1	HINFP_4	0.114005	0.36086	0.0592953	0.0888366
rs16850809	chr1	promoter	51094	ADIPOR1	ETS1_3	0.0289564	0.256726	0.0593462	0.088851
rs6666089	chr1	promoter	51094	ADIPOR1	GLI2_2	0.158536	0.773981	0.0593606	0.0888523
rs16850809	chr1	promoter	51094	ADIPOR1	DBP_1	0.317975	0.0326277	0.0595217	0.0889005
rs16850799	chr1	promoter	51094	ADIPOR1	HIC1_5	0.265973	0.0556249	0.060059	0.0891005
rs6666089	chr1	promoter	51094	ADIPOR1	SRY_7	0.209448	0.825096	0.0600723	0.0891116
rs16850809	chr1	promoter	51094	ADIPOR1	REST_disc3	0.0706846	0.661743	0.0601078	0.0891116
rs16850799	chr1	promoter	51094	ADIPOR1	SMC3_disc3	0.249639	0.727264	0.06015	0.0891116
rs16850799	chr1	promoter	51094	ADIPOR1	SPDEF_3	0.389332	0.0732245	0.0605512	0.0893043
rs16850799	chr1	promoter	51094	ADIPOR1	NKX6-2_1	0.247706	0.085943	0.0606346	0.0893437
rs16850809	chr1	promoter	51094	ADIPOR1	SOX18_4	0.0954862	0.385016	0.0606854	0.0893556
rs10920532	chr1	promoter	51094	ADIPOR1	YY2_1	0.0747551	0.380553	0.0607954	0.0893965
rs6666089	chr1	promoter	51094	ADIPOR1	IRX6_1	0.690989	0.181556	0.0609207	0.0894022
rs6666089	chr1	promoter	51094	ADIPOR1	AP1_disc4	0.29949	0.0777827	0.0609249	0.0894022
rs10920532	chr1	promoter	51094	ADIPOR1	THAP1_disc2	0.0129164	0.0874527	0.0609448	0.0894022
rs10920532	chr1	promoter	51094	ADIPOR1	ZBTB33_disc3	0.0852666	0.422218	0.0609499	0.0894022
rs16850799	chr1	promoter	51094	ADIPOR1	USF_4	0.118924	0.641527	0.0610334	0.0894106
rs6666089	chr1	promoter	51094	ADIPOR1	E2F1_16	0.260508	0.882621	0.0610373	0.0894106
rs6666089	chr1	promoter	51094	ADIPOR1	E2F1_13	0.190176	0.587053	0.0610635	0.0894106
rs10920532	chr1	promoter	51094	ADIPOR1	MYC_disc5	0.062698	0.461989	0.0611971	0.0894572
rs10920532	chr1	promoter	51094	ADIPOR1	REST_disc4	0.32683	0.897075	0.061285	0.0894604
rs16850799	chr1	promoter	51094	ADIPOR1	RAD21_disc2	0.0842608	0.519598	0.0613984	0.0895462
rs6666089	chr1	promoter	51094	ADIPOR1	EBOX_1	0.122985	0.60038	0.0615113	0.0895891
rs16850809	chr1	promoter	51094	ADIPOR1	TCF3_5	0.609927	0.113313	0.0617481	0.0896908
rs16850799	chr1	promoter	51094	ADIPOR1	REST_disc8	0.333722	0.754965	0.0617531	0.0896908
rs6666089	chr1	promoter	51094	ADIPOR1	MEF2A_4	0.380765	0.0846991	0.0617812	0.0896964
rs6666089	chr1	promoter	51094	ADIPOR1	DMRT3_1	0.807947	0.174662	0.061819	0.0897042
rs6666089	chr1	promoter	51094	ADIPOR1	NKX3-2_2	0.0279278	0.108571	0.0618505	0.0897263
rs10920532	chr1	promoter	51094	ADIPOR1	HOXD12_3	0.436849	0.086653	0.0619637	0.0898376
rs16850809	chr1	promoter	51094	ADIPOR1	HDAC2_disc3	0.308455	0.805043	0.0620746	0.0898626
rs16850799	chr1	promoter	51094	ADIPOR1	CRX_1	0.0543068	0.0135922	0.0620771	0.0898626
rs16850799	chr1	promoter	51094	ADIPOR1	RARB_2	0.148018	0.564495	0.0620819	0.0898626
rs16850809	chr1	promoter	51094	ADIPOR1	NFIC_3	0.0720038	0.253492	0.0621516	0.0899039
rs16850799	chr1	promoter	51094	ADIPOR1	SIX6_2	0.257777	0.0606369	0.0621858	0.0899183
rs16850799	chr1	promoter	51094	ADIPOR1	NKX6-2_2	0.815259	0.145265	0.0623167	0.0899805
rs16850799	chr1	promoter	51094	ADIPOR1	SIX3_1	0.189542	0.0450681	0.0623732	0.0899841
rs16850799	chr1	promoter	51094	ADIPOR1	SOX1_3	0.648171	0.145305	0.0623815	0.0899841
rs16850799	chr1	promoter	51094	ADIPOR1	IRF6_1	0.747216	0.163993	0.0624469	0.0899841
rs6666089	chr1	promoter	51094	ADIPOR1	MTF1_2	0.170386	0.751657	0.0624752	0.0899841
rs16850799	chr1	promoter	51094	ADIPOR1	E2F4_3	0.12223	0.531669	0.0625264	0.0900123
rs16850809	chr1	promoter	51094	ADIPOR1	NR2F6_2	0.435773	0.125607	0.0626661	0.0900313
rs6666089	chr1	promoter	51094	ADIPOR1	SPIB_2	0.0267872	0.119261	0.0628686	0.0901111
rs10920532	chr1	promoter	51094	ADIPOR1	TFCP2_1	0.0460874	0.160088	0.0628811	0.0901233
rs16850809	chr1	promoter	51094	ADIPOR1	PAX8_2	0.0910868	0.370748	0.062993	0.0902251
rs16850809	chr1	promoter	51094	ADIPOR1	NFYA_1	0.183365	0.642587	0.0630516	0.0902338
rs16850799	chr1	promoter	51094	ADIPOR1	RUNX2_2	0.222038	0.0561408	0.0630768	0.0902338
rs10920532	chr1	promoter	51094	ADIPOR1	ZNF740_1	0.195441	0.592402	0.0631175	0.0902338
rs10920532	chr1	promoter	51094	ADIPOR1	HIC1_3	0.581768	0.145014	0.063125	0.0902338
rs6666089	chr1	promoter	51094	ADIPOR1	POU2F1_6	0.394905	0.11574	0.0632245	0.0902447
rs6666089	chr1	promoter	51094	ADIPOR1	RXRA_disc5	0.102894	0.450071	0.063354	0.0903067
rs16850809	chr1	promoter	51094	ADIPOR1	NR2E1_1	0.6397	0.123782	0.0634233	0.0903067
rs10920532	chr1	promoter	51094	ADIPOR1	TBX5_1	0.188868	0.865615	0.0635165	0.0903067
rs16850809	chr1	promoter	51094	ADIPOR1	NKX2-2_1	0.426068	0.110346	0.0635236	0.0903067
rs10920532	chr1	promoter	51094	ADIPOR1	IRX2_2	0.35194	0.0763551	0.0635881	0.0903291
rs6666089	chr1	promoter	51094	ADIPOR1	ELF1_disc1	0.115503	0.644457	0.0636099	0.0903291
rs10920532	chr1	promoter	51094	ADIPOR1	POU2F1_8	0.456803	0.132535	0.0636905	0.0903586
rs10920532	chr1	promoter	51094	ADIPOR1	ZSCAN4_3	0.270357	0.95534	0.0637786	0.0903993
rs16850799	chr1	promoter	51094	ADIPOR1	GFI1_3	0.863871	0.194074	0.0638407	0.0904112
rs10920532	chr1	promoter	51094	ADIPOR1	MEIS3_4	0.0630799	0.319668	0.0638547	0.0904125
rs16850799	chr1	promoter	51094	ADIPOR1	TCF3_6	0.0784654	0.333158	0.0639736	0.0904463
rs10920532	chr1	promoter	51094	ADIPOR1	POU_1	0.673403	0.184465	0.0640781	0.0904569
rs6666089	chr1	promoter	51094	ADIPOR1	MXI1_disc2	0.155148	0.693844	0.0642708	0.0905339
rs6666089	chr1	promoter	51094	ADIPOR1	E2F1_5	0.158966	0.747576	0.0642788	0.0905339
rs16850809	chr1	promoter	51094	ADIPOR1	FOXO6_3	0.150305	0.588431	0.0642796	0.0905339
rs16850799	chr1	promoter	51094	ADIPOR1	RFX4_1	0.114887	0.521557	0.0643486	0.0905616
rs16850799	chr1	promoter	51094	ADIPOR1	ESR1_1	0.25188	0.982221	0.0647457	0.0907214
rs6666089	chr1	promoter	51094	ADIPOR1	ZNF740_1	0.235358	0.674629	0.0648498	0.0907641
rs16850809	chr1	promoter	51094	ADIPOR1	CREB3L2_1	0.57426	0.139078	0.0649644	0.0907803
rs16850799	chr1	promoter	51094	ADIPOR1	TFEB_1	0.121659	0.611082	0.0650643	0.0908029
rs16850809	chr1	promoter	51094	ADIPOR1	ZBTB7A_disc1	0.417111	0.0580707	0.0651687	0.0908029
rs16850799	chr1	promoter	51094	ADIPOR1	AR_6	0.722136	0.19812	0.0651762	0.0908029
rs6666089	chr1	promoter	51094	ADIPOR1	MYC::MAX_2	0.109619	0.581002	0.0652358	0.0908271
rs16850809	chr1	promoter	51094	ADIPOR1	SIX5_disc1	0.132055	0.813611	0.065238	0.0908271
rs10920532	chr1	promoter	51094	ADIPOR1	SPIB_1	0.919307	0.162255	0.0652985	0.0908532
rs16850809	chr1	promoter	51094	ADIPOR1	SOX15_2	0.275602	0.0612901	0.065336	0.0908578
rs16850809	chr1	promoter	51094	ADIPOR1	MEIS2_1	0.603411	0.153895	0.0653698	0.0908783
rs10920532	chr1	promoter	51094	ADIPOR1	TFAP2A_3	0.234564	0.707984	0.0655579	0.0909403
rs16850799	chr1	promoter	51094	ADIPOR1	HSF_disc1	0.0399226	0.139046	0.0655746	0.0909403
rs6666089	chr1	promoter	51094	ADIPOR1	NHLH1_3	0.205312	0.812243	0.0658771	0.0910589
rs16850809	chr1	promoter	51094	ADIPOR1	EGR2_1	0.0987038	0.604148	0.06591	0.091086
rs16850799	chr1	promoter	51094	ADIPOR1	SOX14_2	0.13616	0.0319928	0.0659561	0.0911155
rs16850809	chr1	promoter	51094	ADIPOR1	NFKB_2	0.206099	0.743215	0.0660221	0.0911555
rs16850809	chr1	promoter	51094	ADIPOR1	MEF2A_1	0.686557	0.256517	0.066061	0.0911647
rs10920532	chr1	promoter	51094	ADIPOR1	CPHX_1	0.038561	0.154036	0.0661884	0.0911771
rs16850809	chr1	promoter	51094	ADIPOR1	SRF_disc2	0.289925	0.700676	0.0662689	0.0911957
rs10920532	chr1	promoter	51094	ADIPOR1	POU2F1_3	0.897305	0.222609	0.0663651	0.091241
rs10920532	chr1	promoter	51094	ADIPOR1	BCL_disc3	0.06477	0.397942	0.0665136	0.0912891
rs16850799	chr1	promoter	51094	ADIPOR1	ALX1_4	0.764976	0.202952	0.0666704	0.0913205
rs10920532	chr1	promoter	51094	ADIPOR1	MTF1_1	0.157682	0.644281	0.0670106	0.0913357
rs16850809	chr1	promoter	51094	ADIPOR1	EOMES_2	0.745456	0.183631	0.0670406	0.0913442
rs16850799	chr1	promoter	51094	ADIPOR1	SIN3A_disc7	0.0713208	0.228261	0.0670584	0.0913511
rs16850799	chr1	promoter	51094	ADIPOR1	SRF_disc2	0.27219	0.638806	0.067243	0.0914092
rs16850809	chr1	promoter	51094	ADIPOR1	ETV3_1	0.112385	0.556262	0.0674242	0.091446
rs16850809	chr1	promoter	51094	ADIPOR1	PITX2_1	0.0912214	0.512968	0.0674717	0.0914541
rs16850799	chr1	promoter	51094	ADIPOR1	ARNT_3	0.124543	0.660155	0.067731	0.091495
rs16850809	chr1	promoter	51094	ADIPOR1	SPDEF_4	0.19603	0.059953	0.0678577	0.0915293
rs16850799	chr1	promoter	51094	ADIPOR1	TEAD1_3	0.668714	0.127034	0.0678933	0.091536
rs10920532	chr1	promoter	51094	ADIPOR1	TEAD1_3	0.665546	0.127034	0.0679493	0.0915663
rs10920532	chr1	promoter	51094	ADIPOR1	REST_disc2	0.0377894	0.196068	0.0679772	0.0915794
rs16850799	chr1	promoter	51094	ADIPOR1	PITX2_2	0.882173	0.241222	0.0679958	0.0915904
rs16850809	chr1	promoter	51094	ADIPOR1	NFY_1	0.233212	0.855719	0.0682294	0.0916876
rs6666089	chr1	promoter	51094	ADIPOR1	ARHGEF12_1	0.597771	0.144262	0.0683176	0.091717
rs10920532	chr1	promoter	51094	ADIPOR1	PDX1_6	0.685573	0.080221	0.0683682	0.091733
rs6666089	chr1	promoter	51094	ADIPOR1	E2F1_20	0.119771	0.526148	0.0685552	0.0917774
rs16850799	chr1	promoter	51094	ADIPOR1	DOBOX5_1	0.931049	0.317428	0.0686092	0.0917774
rs6666089	chr1	promoter	51094	ADIPOR1	HOXA10_1	0.00638323	0.0215974	0.0686223	0.0917774
rs16850799	chr1	promoter	51094	ADIPOR1	ZIC3_4	0.151853	0.478261	0.0688093	0.091848
rs10920532	chr1	promoter	51094	ADIPOR1	NKX2-5_4	0.536731	0.0526144	0.0688489	0.0918677
rs16850809	chr1	promoter	51094	ADIPOR1	NKX6-1_6	0.155209	0.793126	0.0689333	0.0919084
rs10920532	chr1	promoter	51094	ADIPOR1	REST_disc8	0.353293	0.766774	0.0689548	0.0919259
rs16850809	chr1	promoter	51094	ADIPOR1	HBP1_1	0.0761127	0.245731	0.0693546	0.0921128
rs16850809	chr1	promoter	51094	ADIPOR1	NR4A2_4	0.174802	0.0408897	0.0694279	0.092135
rs16850799	chr1	promoter	51094	ADIPOR1	OTX_1	0.679912	0.137642	0.069478	0.0921683
rs10920532	chr1	promoter	51094	ADIPOR1	MYBL1_3	0.990986	0.207281	0.0696129	0.0922081
rs16850799	chr1	promoter	51094	ADIPOR1	NKX6-2_3	0.79773	0.169749	0.0696849	0.0922274
rs6666089	chr1	promoter	51094	ADIPOR1	TFE_1	0.142384	0.680996	0.069999	0.0923354
rs16850799	chr1	promoter	51094	ADIPOR1	SRY_7	0.0272437	0.00722348	0.0700001	0.0923354
rs6666089	chr1	promoter	51094	ADIPOR1	PRDM1_disc1	0.0988547	0.406203	0.0702323	0.092388
rs16850809	chr1	promoter	51094	ADIPOR1	SOX3_1	0.782181	0.259433	0.0702808	0.092388
rs10920532	chr1	promoter	51094	ADIPOR1	CEBP_4	0.667012	0.167434	0.0702949	0.092388
rs10920532	chr1	promoter	51094	ADIPOR1	NRF1_disc3	0.0716096	0.313667	0.0703466	0.092388
rs16850809	chr1	promoter	51094	ADIPOR1	BARHL2_4	0.548216	0.165682	0.0704072	0.092388
rs10920532	chr1	promoter	51094	ADIPOR1	PRDM1_2	0.0878091	0.329423	0.0706555	0.0924867
rs6666089	chr1	promoter	51094	ADIPOR1	FOXO4_5	0.0459543	0.169195	0.0706806	0.0924947
rs16850799	chr1	promoter	51094	ADIPOR1	FOXJ1_1	0.573014	0.159914	0.0709193	0.0925609
rs10920532	chr1	promoter	51094	ADIPOR1	ESR2_1	0.311619	0.954542	0.0710572	0.0926322
rs10920532	chr1	promoter	51094	ADIPOR1	HMBOX1_2	0.483178	0.106253	0.0711515	0.0927055
rs10920532	chr1	promoter	51094	ADIPOR1	E2F1_13	0.260651	0.707348	0.0713623	0.0928217
rs16850809	chr1	promoter	51094	ADIPOR1	LEF1_5	0.971541	0.253943	0.0713821	0.092831
rs16850799	chr1	promoter	51094	ADIPOR1	CREB3_2	0.131033	0.58956	0.0715295	0.0929082
rs6666089	chr1	promoter	51094	ADIPOR1	MYOD1_2	0.12632	0.55451	0.0715751	0.0929183
rs6666089	chr1	promoter	51094	ADIPOR1	PATZ1_1	0.0975565	0.272307	0.0717496	0.0929185
rs16850809	chr1	promoter	51094	ADIPOR1	BARHL1_4	0.569428	0.166748	0.0721502	0.0931224
rs10920532	chr1	promoter	51094	ADIPOR1	IRF2_2	0.0896346	0.241061	0.0722255	0.0931516
rs6666089	chr1	promoter	51094	ADIPOR1	ZNF740_4	0.178307	0.553553	0.0725003	0.0932772
rs16850799	chr1	promoter	51094	ADIPOR1	OBOX5_1	0.884382	0.251634	0.0726304	0.0933015
rs16850799	chr1	promoter	51094	ADIPOR1	SREBF_1	0.163777	0.659632	0.0726497	0.0933015
rs16850809	chr1	promoter	51094	ADIPOR1	HLF_2	0.166148	0.0361152	0.0727125	0.0933015
rs16850809	chr1	promoter	51094	ADIPOR1	NFIA_1	0.154878	0.589156	0.0729448	0.0933857
rs16850809	chr1	promoter	51094	ADIPOR1	HOXC10_2	0.793619	0.211778	0.0730389	0.093403
rs16850809	chr1	promoter	51094	ADIPOR1	RFX5_disc2	0.176544	0.919511	0.0730408	0.093403
rs16850799	chr1	promoter	51094	ADIPOR1	PKNOX2_2	0.0136698	0.0650719	0.0731554	0.093459
rs16850809	chr1	promoter	51094	ADIPOR1	THAP1_disc2	0.0270237	0.158909	0.07317	0.093459
rs6666089	chr1	promoter	51094	ADIPOR1	IRX5_1	0.751083	0.212516	0.0732741	0.0934633
rs16850809	chr1	promoter	51094	ADIPOR1	PTF1A_1	0.677165	0.185966	0.0734153	0.0935198
rs10920532	chr1	promoter	51094	ADIPOR1	GATA1_5	0.390667	0.0471443	0.0735454	0.0935993
rs16850799	chr1	promoter	51094	ADIPOR1	ISX_3	0.962036	0.231441	0.0735511	0.0936012
rs16850799	chr1	promoter	51094	ADIPOR1	MYC::MAX_2	0.143956	0.627399	0.0736175	0.0936213
rs6666089	chr1	promoter	51094	ADIPOR1	FOXA_disc4	0.474637	0.086045	0.0736743	0.0936612
rs10920532	chr1	promoter	51094	ADIPOR1	SPDEF_7	0.210856	0.0639692	0.0739839	0.0938103
rs16850809	chr1	promoter	51094	ADIPOR1	T_2	0.639724	0.143201	0.0743129	0.0939337
rs16850809	chr1	promoter	51094	ADIPOR1	CREB_1	0.0463573	0.425629	0.0743493	0.0939458
rs6666089	chr1	promoter	51094	ADIPOR1	HOXD11_2	0.688501	0.237416	0.0743578	0.0939475
rs16850799	chr1	promoter	51094	ADIPOR1	CREB1_10	0.12624	0.725212	0.0744851	0.0940106
rs10920532	chr1	promoter	51094	ADIPOR1	DMRT1_1	0.502359	0.140889	0.0746244	0.0940857
rs16850799	chr1	promoter	51094	ADIPOR1	REST_disc5	0.29771	0.754201	0.0747076	0.094092
rs16850809	chr1	promoter	51094	ADIPOR1	MEIS1_2	0.286656	0.0783208	0.0747316	0.094092
rs10920532	chr1	promoter	51094	ADIPOR1	NKX3-1_6	0.103417	0.0199844	0.074753	0.0940925
rs16850799	chr1	promoter	51094	ADIPOR1	CDX_1	0.506642	0.138723	0.0747731	0.0941115
rs10920532	chr1	promoter	51094	ADIPOR1	CREB1_9	0.125934	0.586506	0.0748133	0.0941115
rs6666089	chr1	promoter	51094	ADIPOR1	TATA_disc7	0.141322	0.439878	0.0748539	0.0941274
rs10920532	chr1	promoter	51094	ADIPOR1	MLXIPL_1	0.180066	0.759779	0.0749823	0.0941639
rs10920532	chr1	promoter	51094	ADIPOR1	NR5A2_1	0.151645	0.611755	0.0749881	0.0941639
rs16850799	chr1	promoter	51094	ADIPOR1	SOX2_2	0.0965969	0.0274906	0.0751576	0.0941965
rs16850799	chr1	promoter	51094	ADIPOR1	NKX6-1_6	0.965965	0.196986	0.0752912	0.0941965
rs10920532	chr1	promoter	51094	ADIPOR1	IRF8_2	0.729001	0.189963	0.0753323	0.0941965
rs6666089	chr1	promoter	51094	ADIPOR1	IRX3_1	0.685154	0.208493	0.0754973	0.0941965
rs16850809	chr1	promoter	51094	ADIPOR1	EOMES_3	0.173251	0.0513332	0.0755885	0.0941965
rs16850799	chr1	promoter	51094	ADIPOR1	DPRX_2	0.885245	0.212376	0.0756222	0.0941965
rs16850809	chr1	promoter	51094	ADIPOR1	NKX6-1_1	0.69189	0.212815	0.0757031	0.0941965
rs16850809	chr1	promoter	51094	ADIPOR1	TEF_2	0.284886	0.0707064	0.0757396	0.0942044
rs16850799	chr1	promoter	51094	ADIPOR1	TBX2_1	0.229605	0.750599	0.0758199	0.0942364
rs6666089	chr1	promoter	51094	ADIPOR1	NKX3-1_3	0.0215115	0.082826	0.0759712	0.0942437
rs16850809	chr1	promoter	51094	ADIPOR1	PKNOX1_1	0.365491	0.100694	0.0763019	0.0943289
rs6666089	chr1	promoter	51094	ADIPOR1	MYC_disc10	0.284336	0.808302	0.0767728	0.0944412
rs16850809	chr1	promoter	51094	ADIPOR1	SOX10_2	0.1126	0.546985	0.076817	0.0944465
rs10920532	chr1	promoter	51094	ADIPOR1	BARHL2_3	0.572779	0.14874	0.0769877	0.0944881
rs6666089	chr1	promoter	51094	ADIPOR1	HIF1A::ARNT_1	0.132832	0.725801	0.0771274	0.0944964
rs16850809	chr1	promoter	51094	ADIPOR1	ZNF740_3	0.102301	0.400621	0.0771997	0.0945138
rs6666089	chr1	promoter	51094	ADIPOR1	DMRTA1_1	0.0193668	0.00490676	0.0772219	0.0945138
rs10920532	chr1	promoter	51094	ADIPOR1	RARB_2	0.217751	0.671669	0.0773235	0.0945517
rs16850799	chr1	promoter	51094	ADIPOR1	OBOX6_1	0.591497	0.174636	0.0775585	0.0945954
rs16850809	chr1	promoter	51094	ADIPOR1	NFIL3_2	0.271244	0.0616435	0.0776644	0.0946337
rs10920532	chr1	promoter	51094	ADIPOR1	EN2_4	0.197444	0.798598	0.0777115	0.0946337
rs16850809	chr1	promoter	51094	ADIPOR1	RUNX1_4	0.403916	0.107035	0.0777699	0.0946337
rs6666089	chr1	promoter	51094	ADIPOR1	MYC::MAX_4	0.137264	0.363805	0.0778568	0.0946889
rs10920532	chr1	promoter	51094	ADIPOR1	FOX_1	0.879743	0.327759	0.0779463	0.0947177
rs10920532	chr1	promoter	51094	ADIPOR1	GATA1_1	0.180223	0.912815	0.0783264	0.0948536
rs10920532	chr1	promoter	51094	ADIPOR1	FOXO4_2	0.053731	0.0210076	0.0783439	0.0948588
rs16850799	chr1	promoter	51094	ADIPOR1	EBOX_1	0.157126	0.667739	0.0785608	0.0949241
rs6666089	chr1	promoter	51094	ADIPOR1	FOXA_disc5	0.288131	0.0796276	0.0787289	0.0949574
rs16850809	chr1	promoter	51094	ADIPOR1	BSX_2	0.93114	0.206032	0.0787679	0.0949883
rs16850799	chr1	promoter	51094	ADIPOR1	DLX4_1	0.636656	0.203603	0.0790334	0.0951064
rs16850799	chr1	promoter	51094	ADIPOR1	PBX1_5	0.0610966	0.185061	0.0791738	0.0951497
rs10920532	chr1	promoter	51094	ADIPOR1	ZNF282_1	0.0454224	0.014799	0.079314	0.0951574
rs6666089	chr1	promoter	51094	ADIPOR1	ZBTB7C_1	0.200414	0.752192	0.0793366	0.0951574
rs16850799	chr1	promoter	51094	ADIPOR1	OTX2_1	0.928098	0.291081	0.0795171	0.0951755
rs6666089	chr1	promoter	51094	ADIPOR1	NFKB_disc1	0.226249	0.668796	0.0797916	0.0951954
rs6666089	chr1	promoter	51094	ADIPOR1	NEUROD2_1	0.19954	0.800797	0.0801443	0.0952566
rs16850809	chr1	promoter	51094	ADIPOR1	CTCF_disc3	0.39306	0.0663651	0.0802088	0.0952576
rs10920532	chr1	promoter	51094	ADIPOR1	NKX3-1_3	0.273976	0.073344	0.0803746	0.0953345
rs16850809	chr1	promoter	51094	ADIPOR1	FOXG1_1	0.687391	0.247609	0.0807673	0.0954702
rs10920532	chr1	promoter	51094	ADIPOR1	EGR2_2	0.459063	0.107191	0.0807918	0.0954702
rs6666089	chr1	promoter	51094	ADIPOR1	EGR_1	0.0644635	0.167868	0.0808147	0.0954702
rs16850799	chr1	promoter	51094	ADIPOR1	HMBOX1_1	0.601339	0.198685	0.0808477	0.0954742
rs16850799	chr1	promoter	51094	ADIPOR1	ELF1_1	0.823481	0.252906	0.0810875	0.0954939
rs16850799	chr1	promoter	51094	ADIPOR1	MYC_2	0.223267	0.0623769	0.0812723	0.0954939
rs10920532	chr1	promoter	51094	ADIPOR1	RFX3_1	0.36299	0.115222	0.0813404	0.0955154
rs10920532	chr1	promoter	51094	ADIPOR1	POU3F2_1	0.823756	0.328992	0.0814058	0.0955355
rs16850809	chr1	promoter	51094	ADIPOR1	SOX21_1	0.563415	0.210701	0.0814341	0.0955355
rs10920532	chr1	promoter	51094	ADIPOR1	STAT3_2	0.683212	0.141195	0.081444	0.0955355
rs6666089	chr1	promoter	51094	ADIPOR1	POU3F3_4	0.359682	0.114007	0.0814908	0.0955355
rs10920532	chr1	promoter	51094	ADIPOR1	BARX1_2	0.247257	0.0775349	0.0815579	0.0955529
rs16850799	chr1	promoter	51094	ADIPOR1	ALX3_3	0.777736	0.229373	0.0816242	0.0955626
rs16850809	chr1	promoter	51094	ADIPOR1	TGIF1_2	0.566229	0.179639	0.0817647	0.0955626
rs16850799	chr1	promoter	51094	ADIPOR1	NR2F1_4	0.0508274	0.265443	0.081806	0.0955836
rs6666089	chr1	promoter	51094	ADIPOR1	STAT_1	0.126759	0.462357	0.081885	0.0956109
rs16850809	chr1	promoter	51094	ADIPOR1	SPZ1_1	0.33353	0.778043	0.0823124	0.0956976
rs6666089	chr1	promoter	51094	ADIPOR1	MLX_2	0.157675	0.790927	0.0823831	0.0957044
rs10920532	chr1	promoter	51094	ADIPOR1	MEIS1_2	0.234299	0.807883	0.0827405	0.0957172
rs16850799	chr1	promoter	51094	ADIPOR1	MEIS3_5	0.133737	0.461887	0.0827516	0.0957172
rs16850809	chr1	promoter	51094	ADIPOR1	PAX1_1	0.087824	0.353402	0.0827773	0.0957172
rs6666089	chr1	promoter	51094	ADIPOR1	BDP1_disc3	0.386087	0.824177	0.0828211	0.0957411
rs10920532	chr1	promoter	51094	ADIPOR1	SREBF2_1	0.177786	0.772455	0.0828683	0.0957618
rs16850799	chr1	promoter	51094	ADIPOR1	FOXL1_2	0.396962	0.0785373	0.0831416	0.0958607
rs16850799	chr1	promoter	51094	ADIPOR1	TGIF1_3	0.117689	0.473576	0.0832729	0.095863
rs16850799	chr1	promoter	51094	ADIPOR1	MGA_3	0.236451	0.753814	0.083287	0.0958692
rs10920532	chr1	promoter	51094	ADIPOR1	SP1_4	0.0928529	0.260157	0.083492	0.0959521
rs6666089	chr1	promoter	51094	ADIPOR1	CTCF_disc8	0.365047	0.86504	0.083685	0.0959964
rs6666089	chr1	promoter	51094	ADIPOR1	ETV6_2	0.113985	0.515452	0.0837419	0.0959964
rs6666089	chr1	promoter	51094	ADIPOR1	GCM2_1	0.074556	0.312082	0.0839478	0.0960511
rs16850799	chr1	promoter	51094	ADIPOR1	LMO2_1	0.0752214	0.2604	0.0839693	0.0960511
rs16850809	chr1	promoter	51094	ADIPOR1	GCM1_4	0.138321	0.534334	0.0840048	0.0960521
rs16850799	chr1	promoter	51094	ADIPOR1	VDR_4	0.122866	0.491285	0.0840061	0.0960521
rs6666089	chr1	promoter	51094	ADIPOR1	YY1_disc2	0.0759263	0.408536	0.0840425	0.0960521
rs16850799	chr1	promoter	51094	ADIPOR1	EN1_1	0.324868	0.0644534	0.0842255	0.0960889
rs10920532	chr1	promoter	51094	ADIPOR1	RREB1_2	0.463623	0.832968	0.0844689	0.0961461
rs6666089	chr1	promoter	51094	ADIPOR1	TBX1_1	0.114579	0.334379	0.084483	0.0961461
rs16850799	chr1	promoter	51094	ADIPOR1	HOXC6_1	0.598171	0.230379	0.0845013	0.0961461
rs6666089	chr1	promoter	51094	ADIPOR1	HIC1_3	0.0701034	0.238154	0.0846097	0.0961673
rs6666089	chr1	promoter	51094	ADIPOR1	THAP1_disc1	0.258093	0.11029	0.0846873	0.0961889
rs10920532	chr1	promoter	51094	ADIPOR1	STAT5A_3	0.899334	0.186065	0.0847802	0.0962175
rs16850799	chr1	promoter	51094	ADIPOR1	POU2F1_8	0.658211	0.220512	0.0848524	0.0962619
rs16850809	chr1	promoter	51094	ADIPOR1	POU2F1_8	0.452479	0.151412	0.0848524	0.0962619
rs10920532	chr1	promoter	51094	ADIPOR1	RAD21_disc6	0.362078	0.80095	0.0848929	0.0962619
rs10920532	chr1	promoter	51094	ADIPOR1	TBX5_2	0.16783	0.74764	0.0849019	0.0962619
rs16850799	chr1	promoter	51094	ADIPOR1	TFAP2C_7	0.316969	0.802164	0.0850048	0.0962912
rs6666089	chr1	promoter	51094	ADIPOR1	TOPORS_1	0.211731	0.577946	0.0850434	0.0962912
rs16850809	chr1	promoter	51094	ADIPOR1	NFY_3	0.216925	0.650928	0.0851962	0.0963179
rs6666089	chr1	promoter	51094	ADIPOR1	TLX2_2	0.054781	0.0206921	0.0852555	0.0963273
rs10920532	chr1	promoter	51094	ADIPOR1	BARHL2_5	0.896768	0.277758	0.0854339	0.0964254
rs16850809	chr1	promoter	51094	ADIPOR1	TAL1_disc1	0.816794	0.275322	0.0855449	0.0964732
rs10920532	chr1	promoter	51094	ADIPOR1	E2F_disc8	0.301898	0.772168	0.0855952	0.0964936
rs16850809	chr1	promoter	51094	ADIPOR1	HOXA11_3	0.899577	0.26221	0.0856849	0.096498
rs16850799	chr1	promoter	51094	ADIPOR1	SOX5_1	0.303664	0.0753671	0.0857048	0.096498
rs10920532	chr1	promoter	51094	ADIPOR1	PPARG_4	0.343196	0.104988	0.0857782	0.0965028
rs16850809	chr1	promoter	51094	ADIPOR1	TFAP4_5	0.652184	0.164534	0.0858094	0.0965028
rs6666089	chr1	promoter	51094	ADIPOR1	RXRA_11	0.282438	0.965611	0.0859739	0.0965029
rs10920532	chr1	promoter	51094	ADIPOR1	AP1_1	0.148255	0.807276	0.086064	0.0965139
rs6666089	chr1	promoter	51094	ADIPOR1	HOXD8_1	0.170862	0.0623183	0.0861275	0.096548
rs16850809	chr1	promoter	51094	ADIPOR1	EP300_disc5	0.084329	0.0266919	0.0862142	0.0965533
rs16850799	chr1	promoter	51094	ADIPOR1	RFX3_3	0.0765585	0.247764	0.0862673	0.0965707
rs6666089	chr1	promoter	51094	ADIPOR1	PAX5_disc4	0.612328	0.153322	0.0864734	0.0966321
rs10920532	chr1	promoter	51094	ADIPOR1	POU2F1_5	0.434801	0.0853823	0.086593	0.0966321
rs6666089	chr1	promoter	51094	ADIPOR1	ZNF713_1	0.123575	0.441605	0.0868654	0.0966321
rs16850809	chr1	promoter	51094	ADIPOR1	HINFP_1	0.136403	0.675922	0.0868797	0.0966321
rs6666089	chr1	promoter	51094	ADIPOR1	MGA_3	0.169589	0.540192	0.0869341	0.0966518
rs16850809	chr1	promoter	51094	ADIPOR1	SRY_4	0.681264	0.23416	0.0869973	0.0966592
rs10920532	chr1	promoter	51094	ADIPOR1	NR1H_2	0.202153	0.708415	0.0870079	0.0966592
rs16850809	chr1	promoter	51094	ADIPOR1	HOXA13_4	0.609327	0.169202	0.0872426	0.0967168
rs6666089	chr1	promoter	51094	ADIPOR1	TBX4_2	0.304685	0.837555	0.0873791	0.096732
rs6666089	chr1	promoter	51094	ADIPOR1	HOXA9_1	0.00969841	0.027495	0.0873981	0.096732
rs10920532	chr1	promoter	51094	ADIPOR1	E2F4_3	0.619819	0.195921	0.0874317	0.096732
rs16850799	chr1	promoter	51094	ADIPOR1	TBX21_4	0.123947	0.4071	0.0876253	0.0967671
rs16850799	chr1	promoter	51094	ADIPOR1	PRRX2_5	0.982075	0.210452	0.0878505	0.0968477
rs10920532	chr1	promoter	51094	ADIPOR1	ELK3_2	0.921373	0.211845	0.0879057	0.0968703
rs10920532	chr1	promoter	51094	ADIPOR1	SIRT6_disc1	0.332603	0.0800622	0.0879928	0.0968936
rs6666089	chr1	promoter	51094	ADIPOR1	FOXJ2_2	0.222742	0.492735	0.0883351	0.0969447
rs10920532	chr1	promoter	51094	ADIPOR1	EP300_disc5	0.0042186	0.00134833	0.0885074	0.0969447
rs16850809	chr1	promoter	51094	ADIPOR1	ETV1_1	0.168297	0.764499	0.0885083	0.0969447
rs16850809	chr1	promoter	51094	ADIPOR1	PKNOX2_2	0.102805	0.0247393	0.0885114	0.0969447
rs16850809	chr1	promoter	51094	ADIPOR1	HNF1A_3	0.793168	0.279702	0.0886141	0.0969641
rs16850809	chr1	promoter	51094	ADIPOR1	AP3_1	0.108699	0.636624	0.0886558	0.0969806
rs16850799	chr1	promoter	51094	ADIPOR1	USF_3	0.205965	0.700631	0.0887228	0.0970171
rs10920532	chr1	promoter	51094	ADIPOR1	REST_disc9	0.343357	0.739042	0.0888751	0.0971305
rs10920532	chr1	promoter	51094	ADIPOR1	BSX_2	0.617876	0.146454	0.0889231	0.0971465
rs6666089	chr1	promoter	51094	ADIPOR1	TGIF1_3	0.126887	0.485891	0.0890191	0.0971755
rs6666089	chr1	promoter	51094	ADIPOR1	SIX5_disc4	0.459256	0.122527	0.0891825	0.0972485
rs10920532	chr1	promoter	51094	ADIPOR1	NKX2-3_2	0.115251	0.0271147	0.0892196	0.0972485
rs16850799	chr1	promoter	51094	ADIPOR1	E2F1_13	0.329212	0.814635	0.0893067	0.0972719
rs16850809	chr1	promoter	51094	ADIPOR1	SPDEF_7	0.161891	0.0563947	0.0893204	0.0972719
rs10920532	chr1	promoter	51094	ADIPOR1	IRF_disc5	0.0292251	0.0137063	0.0893638	0.0972777
rs16850799	chr1	promoter	51094	ADIPOR1	MYC_disc9	0.347608	0.785906	0.0894096	0.0972952
rs10920532	chr1	promoter	51094	ADIPOR1	ELF5_2	0.0540824	0.015536	0.0896056	0.0973335
rs16850799	chr1	promoter	51094	ADIPOR1	FOXG1_1	0.289968	0.640768	0.0901038	0.0975344
rs16850809	chr1	promoter	51094	ADIPOR1	ZNF143_disc1	0.800414	0.241628	0.0901772	0.0975344
rs10920532	chr1	promoter	51094	ADIPOR1	TFAP2C_6	0.289399	0.844329	0.090188	0.0975344
rs16850809	chr1	promoter	51094	ADIPOR1	TBX2_2	0.561518	0.147779	0.0901916	0.0975344
rs6666089	chr1	promoter	51094	ADIPOR1	E2F1_2	0.0941017	0.530516	0.0902283	0.0975344
rs16850799	chr1	promoter	51094	ADIPOR1	IKZF1_1	0.711369	0.218365	0.0903342	0.0975447
rs16850809	chr1	promoter	51094	ADIPOR1	PBX3_disc2	0.149273	0.577119	0.0905528	0.0976028
rs10920532	chr1	promoter	51094	ADIPOR1	POU5F1_1	0.961385	0.294135	0.0906661	0.0976028
rs16850799	chr1	promoter	51094	ADIPOR1	SIN3A_disc6	0.372768	0.725271	0.091325	0.0977388
rs10920532	chr1	promoter	51094	ADIPOR1	IKZF2_3	0.0258893	0.0079655	0.0914634	0.0977785
rs10920532	chr1	promoter	51094	ADIPOR1	STAT5A_4	0.76157	0.176947	0.0914885	0.0977785
rs16850799	chr1	promoter	51094	ADIPOR1	NR2C2_disc3	0.159936	0.591672	0.0915124	0.0977785
rs16850809	chr1	promoter	51094	ADIPOR1	TBR1_1	0.451579	0.109054	0.0916701	0.0977845
rs6666089	chr1	promoter	51094	ADIPOR1	TBX5_5	0.305744	0.83057	0.0917311	0.0978094
rs16850799	chr1	promoter	51094	ADIPOR1	HIC1_3	0.519669	0.170715	0.0917607	0.0978139
rs16850809	chr1	promoter	51094	ADIPOR1	SOX21_3	0.0626357	0.176706	0.0918402	0.0978356
rs16850799	chr1	promoter	51094	ADIPOR1	ARID5B_1	0.0301279	0.00966837	0.0918442	0.0978356
rs16850809	chr1	promoter	51094	ADIPOR1	IRF_disc1	0.183317	0.724727	0.0919106	0.0978599
rs10920532	chr1	promoter	51094	ADIPOR1	IRX3_3	0.502545	0.152643	0.0920424	0.0978805
rs16850809	chr1	promoter	51094	ADIPOR1	MEIS3_1	0.568431	0.177378	0.0922006	0.0979327
rs10920532	chr1	promoter	51094	ADIPOR1	MYC_1	0.188014	0.0290852	0.0922911	0.0979702
rs16850799	chr1	promoter	51094	ADIPOR1	SOX14_4	0.0385792	0.0122321	0.0924382	0.0980125
rs16850799	chr1	promoter	51094	ADIPOR1	HSFY2_3	0.31296	0.0911267	0.0924648	0.0980125
rs16850799	chr1	promoter	51094	ADIPOR1	MEIS1::HOXA9_2	0.203502	0.731954	0.0927825	0.0980859
rs16850799	chr1	promoter	51094	ADIPOR1	MYB_1	0.29761	0.778594	0.0928676	0.0981241
rs16850809	chr1	promoter	51094	ADIPOR1	CUX1_4	0.267803	0.748104	0.0929693	0.0981483
rs6666089	chr1	promoter	51094	ADIPOR1	ZNF281_1	0.281853	0.6968	0.0930814	0.0981816
rs16850799	chr1	promoter	51094	ADIPOR1	PAX4_7	0.729579	0.186211	0.0932811	0.0982088
rs16850799	chr1	promoter	51094	ADIPOR1	USF_5	0.141929	0.487875	0.0933401	0.0982154
rs6666089	chr1	promoter	51094	ADIPOR1	HMX3_3	0.0820911	0.303247	0.093345	0.0982154
rs16850799	chr1	promoter	51094	ADIPOR1	MSX1_4	0.882706	0.262614	0.0933915	0.0982258
rs10920532	chr1	promoter	51094	ADIPOR1	RFX5_1	0.0373572	0.0106973	0.0934499	0.0982364
rs6666089	chr1	promoter	51094	ADIPOR1	E2F1_6	0.168508	0.692922	0.0934849	0.0982367
rs10920532	chr1	promoter	51094	ADIPOR1	TFEC_1	0.180875	0.643915	0.0938814	0.0983233
rs6666089	chr1	promoter	51094	ADIPOR1	ALX4_1	0.141712	0.527398	0.0939419	0.0983233
rs6666089	chr1	promoter	51094	ADIPOR1	E2F1_8	0.14777	0.661592	0.0941046	0.0983561
rs6666089	chr1	promoter	51094	ADIPOR1	RXRB_2	0.233493	0.733006	0.0944845	0.098545
rs16850809	chr1	promoter	51094	ADIPOR1	PKNOX1_2	0.30554	0.0814895	0.0946701	0.0985976
rs16850799	chr1	promoter	51094	ADIPOR1	NFY_1	0.211323	0.670106	0.0949535	0.098632
rs16850809	chr1	promoter	51094	ADIPOR1	BDP1_disc2	0.107478	0.470598	0.0950093	0.098632
rs16850809	chr1	promoter	51094	ADIPOR1	YY1_5	0.138343	0.0386564	0.0950389	0.098632
rs16850809	chr1	promoter	51094	ADIPOR1	RUNX2_2	0.255299	0.883805	0.0950461	0.098632
rs6666089	chr1	promoter	51094	ADIPOR1	ZEB1_2	0.11953	0.4671	0.0951108	0.0986599
rs6666089	chr1	promoter	51094	ADIPOR1	IRX3_2	0.734475	0.262937	0.0951292	0.0986599
rs10920532	chr1	promoter	51094	ADIPOR1	MEIS1_3	0.220287	0.732457	0.0952007	0.0986866
rs10920532	chr1	promoter	51094	ADIPOR1	TCF12_1	0.106211	0.453874	0.095765	0.0988763
rs6666089	chr1	promoter	51094	ADIPOR1	TCF3_6	0.271417	0.855925	0.0957983	0.0988763
rs6666089	chr1	promoter	51094	ADIPOR1	GATA_disc3	0.0494597	0.173242	0.0959158	0.0988763
rs16850809	chr1	promoter	51094	ADIPOR1	BARHL2_7	0.626847	0.218585	0.0960365	0.0988763
rs16850809	chr1	promoter	51094	ADIPOR1	RARA_1	0.514832	0.169243	0.0962457	0.0989293
rs10920532	chr1	promoter	51094	ADIPOR1	RFX4_1	0.251101	0.0744851	0.0963732	0.0989701
rs16850809	chr1	promoter	51094	ADIPOR1	TBP_1	0.320839	0.117872	0.0964606	0.0990068
rs10920532	chr1	promoter	51094	ADIPOR1	FOXL1_4	0.192029	0.85432	0.0966187	0.0990477
rs16850809	chr1	promoter	51094	ADIPOR1	IKZF1_1	0.417431	0.134971	0.096691	0.0990676
rs6666089	chr1	promoter	51094	ADIPOR1	HMX1_2	0.0977429	0.339548	0.0967043	0.0990676
rs16850809	chr1	promoter	51094	ADIPOR1	HNF1A_2	0.904634	0.321908	0.0967814	0.0990676
rs6666089	chr1	promoter	51094	ADIPOR1	E2F2_1	0.246267	0.788544	0.0968107	0.0990676
rs16850799	chr1	promoter	51094	ADIPOR1	ARID5A_1	0.271167	0.110998	0.0970418	0.0991536
rs16850799	chr1	promoter	51094	ADIPOR1	ZBTB33_disc4	0.13451	0.572605	0.097087	0.0991536
rs10920532	chr1	promoter	51094	ADIPOR1	SP4_1	0.110235	0.339499	0.0971882	0.0991596
rs10920532	chr1	promoter	51094	ADIPOR1	NKX3-2_2	0.365522	0.131619	0.0972701	0.0991596
rs16850799	chr1	promoter	51094	ADIPOR1	HOXD9_1	0.44413	0.105537	0.0973165	0.0991596
rs16850799	chr1	promoter	51094	ADIPOR1	PITX1_1	0.202551	0.0730545	0.0973603	0.0991596
rs16850809	chr1	promoter	51094	ADIPOR1	FOXK1_2	0.193303	0.822808	0.0975669	0.099215
rs10920532	chr1	promoter	51094	ADIPOR1	PAX9_1	0.754446	0.263127	0.097711	0.0992783
rs16850799	chr1	promoter	51094	ADIPOR1	AHR_2	0.175436	0.683414	0.0977303	0.0992783
rs6666089	chr1	promoter	51094	ADIPOR1	SP1_4	0.152643	0.394569	0.097759	0.09928
rs16850809	chr1	promoter	51094	ADIPOR1	TFAP4_3	0.655254	0.175942	0.09779	0.0992908
rs16850809	chr1	promoter	51094	ADIPOR1	GLI2_1	0.310745	0.832763	0.0978273	0.0993119
rs16850809	chr1	promoter	51094	ADIPOR1	CREB1_6	0.794659	0.193159	0.0980859	0.0993849
rs16850809	chr1	promoter	51094	ADIPOR1	EGR2_3	0.261329	0.811717	0.0983519	0.0994796
rs16850799	chr1	promoter	51094	ADIPOR1	SOX5_2	0.236496	0.0572555	0.0983822	0.0994893
rs10920532	chr1	promoter	51094	ADIPOR1	YY1_7	0.0412916	0.160561	0.0985967	0.0995379
rs16850809	chr1	promoter	51094	ADIPOR1	ATF1_1	0.899227	0.26033	0.098604	0.099539
rs16850809	chr1	promoter	51094	ADIPOR1	TGIF2_1	0.410334	0.121624	0.0987176	0.0995766
rs16850799	chr1	promoter	51094	ADIPOR1	MTF1_1	0.16847	0.572738	0.0988085	0.0996138
rs16850809	chr1	promoter	51094	ADIPOR1	CACD_2	0.290616	0.798235	0.0992387	0.0997526
rs16850799	chr1	promoter	51094	ADIPOR1	FOXC1_5	0.453733	0.122247	0.0993526	0.0998049
rs10920532	chr1	promoter	51094	ADIPOR1	HOXC10_4	0.698762	0.196981	0.0994349	0.099831
rs6666089	chr1	promoter	51094	ADIPOR1	ISL2_2	0.019981	0.0810497	0.0995766	0.0998714
rs10920532	chr1	promoter	51094	ADIPOR1	TGIF1_2	0.312105	0.852456	0.0996067	0.0998714
rs10920532	chr1	promoter	51094	ADIPOR1	SPI1_3	0.00931229	0.00324426	0.0996109	0.0998714
rs16850799	chr1	promoter	51094	ADIPOR1	HNF1A_3	0.490114	0.181312	0.0996289	0.0998717
rs16850799	chr1	promoter	51094	ADIPOR1	DLX2_3	0.867193	0.224545	0.0998434	0.0999337
rs6666089	chr1	promoter	51094	ADIPOR1	ATF3_disc4	0.280867	0.844565	0.0999584	0.099971
rs4737021	chr8	promoter	286	ANK1	TFCP2_2	0.038794	0.0026556	0	0
rs475831	chr8	promoter	286	ANK1	RAD21_disc6	0.0197813	2.23e-08	0	0
rs508419	chr8	promoter	286	ANK1	ZEB1_2	2.49e-07	0.057433	0	0
rs508419	chr8	promoter	286	ANK1	ZNF143_disc4	0.0936012	1.25e-07	0	0
rs508419	chr8	promoter	286	ANK1	MYC_disc9	0.162458	2.08e-07	0	0
rs508419	chr8	promoter	286	ANK1	SPI1_disc3	0.0363795	1.33e-07	0	0
rs6989203	chr8	promoter	286	ANK1	GATA1_2	1.67e-07	0.0958356	0	0
rs6989203	chr8	promoter	286	ANK1	POU1F1_1	0.00272869	5.08e-08	0	0
rs508419	chr8	promoter	286	ANK1	ETS_disc9	0.219496	1.28e-05	9.07e-09	1.88e-06
rs475831	chr8	promoter	286	ANK1	ELF1_disc2	0.0431959	2.96e-08	2.75e-08	5.59e-06
rs1137177	chr8	promoter	286	ANK1	CREB1_2	9.15e-07	0.150333	6.68e-08	1.3e-05
rs1137177	chr8	promoter	286	ANK1	ATF4_1	2.54e-05	0.00378709	5.65e-07	9.85e-05
rs4737021	chr8	promoter	286	ANK1	MYC_disc10	0.218796	1.25e-06	7.56e-07	0.000127316
rs508419	chr8	promoter	286	ANK1	HDAC2_disc4	0.00535254	5.63e-08	9.34e-07	0.000154333
rs475831	chr8	promoter	286	ANK1	ATF3_disc4	0.0353309	1.9e-06	1.94e-06	0.000280369
rs475831	chr8	promoter	286	ANK1	BCL_disc1	0.0655971	0.000403873	3.44e-06	0.00044284
rs475831	chr8	promoter	286	ANK1	REST_disc8	0.0932827	2.63e-07	3.7e-06	0.000462855
rs475831	chr8	promoter	286	ANK1	BCL_disc10	0.00799907	1.51e-07	5.28e-06	0.000625186
rs1137177	chr8	promoter	286	ANK1	PAX4_1	2.75e-06	0.107589	5.57e-06	0.000656016
rs475831	chr8	promoter	286	ANK1	MYC_disc10	0.0222004	3.16e-06	6.01e-06	0.000704092
rs6989203	chr8	promoter	286	ANK1	POU3F3_4	0.0176634	5.58e-05	7.73e-06	0.000886827
rs4737021	chr8	promoter	286	ANK1	IRF_1	0.000119772	0.10184	9e-06	0.00101672
rs4737021	chr8	promoter	286	ANK1	IRF9_1	0.000109453	0.00421979	2.29e-05	0.00227377
rs475831	chr8	promoter	286	ANK1	ELK1_4	0.197394	8e-05	3.25e-05	0.00306798
rs4737021	chr8	promoter	286	ANK1	IRF3_1	3.09e-05	0.00443297	3.94e-05	0.00353196
rs6989203	chr8	promoter	286	ANK1	PDX1_2	0.000257828	8.21e-08	4.96e-05	0.00412873
rs4737021	chr8	promoter	286	ANK1	OSR2_1	0.061964	0.00170933	5.23e-05	0.00427316
rs4737021	chr8	promoter	286	ANK1	RAD21_disc5	0.127157	0.000265456	9.16e-05	0.00667173
rs1137177	chr8	promoter	286	ANK1	ATF1_1	0.00103481	0.0855123	0.000135389	0.00892199
rs4737021	chr8	promoter	286	ANK1	STAT_disc3	4.67e-05	0.00170553	0.000140008	0.0091447
rs475831	chr8	promoter	286	ANK1	ELF1_disc3	0.078891	0.000450462	0.000142427	0.00919422
rs6989203	chr8	promoter	286	ANK1	POU2F3_3	0.0396013	0.00148804	0.000173827	0.0102911
rs6989203	chr8	promoter	286	ANK1	MYEF2_7	0.109619	0.00375138	0.000190028	0.0107392
rs4737021	chr8	promoter	286	ANK1	IRF3_2	8.8e-05	0.00170219	0.000193679	0.0108278
rs475831	chr8	promoter	286	ANK1	ELF4_1	0.769032	0.000562515	0.000195096	0.0108278
rs6989203	chr8	promoter	286	ANK1	SOX2_7	0.00759308	0.244992	0.000199246	0.01092
rs4737021	chr8	promoter	286	ANK1	CACBP_1	0.113456	0.00478308	0.000267439	0.0133127
rs475831	chr8	promoter	286	ANK1	ELF1_disc1	0.0726458	0.00329924	0.000286089	0.0139528
rs6989203	chr8	promoter	286	ANK1	MYEF2_4	0.122042	0.0075723	0.000303765	0.0144956
rs4737021	chr8	promoter	286	ANK1	IRF4_2	0.000422343	0.0111495	0.000329523	0.0149514
rs1137177	chr8	promoter	286	ANK1	TBX5_2	0.223842	0.00712113	0.000337632	0.0151948
rs475831	chr8	promoter	286	ANK1	ZBTB33_disc2	0.260187	0.00551779	0.000355717	0.0156586
rs508419	chr8	promoter	286	ANK1	TBX5_1	0.00417756	0.149737	0.000394247	0.0166592
rs4737021	chr8	promoter	286	ANK1	NFE2L2_1	0.0193308	0.000494123	0.00040581	0.0170036
rs475831	chr8	promoter	286	ANK1	TATA_disc10	0.0766381	0.000606427	0.000407869	0.0170036
rs6989203	chr8	promoter	286	ANK1	PBX1_4	0.0010256	0.0939975	0.000417269	0.0170684
rs508419	chr8	promoter	286	ANK1	HEY1_disc2	0.0242611	0.000464101	0.000428043	0.0171022
rs508419	chr8	promoter	286	ANK1	TBX20_4	0.00256896	0.961529	0.000432592	0.0171496
rs1137177	chr8	promoter	286	ANK1	CREB1_9	0.000166627	0.186823	0.000439806	0.0173159
rs475831	chr8	promoter	286	ANK1	RAD21_disc8	0.0066474	0.000180857	0.000439821	0.0173159
rs475831	chr8	promoter	286	ANK1	NR2C2_disc3	0.0700762	0.0035226	0.000457001	0.0176288
rs1137177	chr8	promoter	286	ANK1	ZBTB33_disc2	0.0101574	0.329853	0.00046294	0.0177366
rs1137177	chr8	promoter	286	ANK1	T_2	0.132786	0.00814159	0.000465404	0.0177366
rs1137177	chr8	promoter	286	ANK1	MEIS1_1	0.290588	0.0113856	0.000513856	0.0186968
rs475831	chr8	promoter	286	ANK1	FEV_2	0.181384	0.00252524	0.000523191	0.0187784
rs6989203	chr8	promoter	286	ANK1	HMGN3_disc2	0.00472168	0.127304	0.000572608	0.0196874
rs6989203	chr8	promoter	286	ANK1	GATA5_2	0.00498603	0.438695	0.000579159	0.0197592
rs4737021	chr8	promoter	286	ANK1	PRDM1_1	0.00118286	0.013306	0.00060632	0.0200675
rs1137177	chr8	promoter	286	ANK1	SOX4_2	0.0717339	0.005873	0.000642508	0.0205553
rs475831	chr8	promoter	286	ANK1	GABPA_2	0.114575	0.00201927	0.000643442	0.0205553
rs4737021	chr8	promoter	286	ANK1	HINFP_3	0.364481	0.0493649	0.000666931	0.0210059
rs6989203	chr8	promoter	286	ANK1	SOX7_3	0.00216217	0.211532	0.000678921	0.0212026
rs6989203	chr8	promoter	286	ANK1	POU5F1B_2	0.0622626	0.00211602	0.000691227	0.0213812
rs6989203	chr8	promoter	286	ANK1	YY1_disc2	0.135618	0.00999552	0.000697621	0.0213997
rs4737021	chr8	promoter	286	ANK1	FOXG1_2	0.00432946	0.548412	0.000710764	0.0216178
rs4737021	chr8	promoter	286	ANK1	RXRA_disc4	0.00226603	0.0528878	0.000722395	0.0217327
rs1137177	chr8	promoter	286	ANK1	CREB1_1	0.00210314	0.0824576	0.000728938	0.0218118
rs6989203	chr8	promoter	286	ANK1	GATA6_1	0.00113756	0.285536	0.000759768	0.0221932
rs475831	chr8	promoter	286	ANK1	ELK1_5	0.288056	0.000767782	0.000761756	0.0221932
rs6989203	chr8	promoter	286	ANK1	PBX1_3	0.00950306	0.962918	0.000841252	0.0234302
rs4737021	chr8	promoter	286	ANK1	ESRRA_disc4	0.251144	0.0135638	0.000862512	0.0236415
rs475831	chr8	promoter	286	ANK1	ETS1_6	0.192964	0.00221226	0.000902547	0.0242643
rs475831	chr8	promoter	286	ANK1	ELK3_2	0.0707865	0.000775668	0.000905407	0.0242643
rs508419	chr8	promoter	286	ANK1	T_2	0.0288061	0.314245	0.000907292	0.0242643
rs4737021	chr8	promoter	286	ANK1	SPI1_4	0.261412	0.00231635	0.000925276	0.0244189
rs1137177	chr8	promoter	286	ANK1	XBP1_3	0.00285641	0.20125	0.000941083	0.0245435
rs475831	chr8	promoter	286	ANK1	HINFP_2	0.690204	0.00477688	0.000972237	0.0250366
rs475831	chr8	promoter	286	ANK1	HEY1_disc2	0.0093624	0.000402173	0.000992843	0.0252394
rs475831	chr8	promoter	286	ANK1	ETS_disc2	0.147255	0.0051169	0.00117445	0.0277236
rs6989203	chr8	promoter	286	ANK1	MYEF2_6	0.261595	0.0549721	0.0011874	0.0279102
rs475831	chr8	promoter	286	ANK1	NFE2L2_1	0.128953	0.0057375	0.00119413	0.0279151
rs475831	chr8	promoter	286	ANK1	NANOG_disc3	0.0146719	0.862151	0.00121286	0.0281501
rs6989203	chr8	promoter	286	ANK1	LMO2_2	0.00607977	0.20748	0.00122952	0.0283432
rs6989203	chr8	promoter	286	ANK1	SOX3_3	0.0195725	0.406342	0.00124598	0.0284681
rs6989203	chr8	promoter	286	ANK1	POU2F1_14	0.0182215	0.0006727	0.00125043	0.0285008
rs4737021	chr8	promoter	286	ANK1	CACD_2	0.383626	0.0215289	0.0012554	0.0285128
rs475831	chr8	promoter	286	ANK1	EGR1_disc2	0.120993	0.00705836	0.00127743	0.02872
rs6989203	chr8	promoter	286	ANK1	POU2F2_4	0.0568736	0.00290532	0.00129042	0.0288301
rs508419	chr8	promoter	286	ANK1	PPARG_1	0.0130178	0.142235	0.00129372	0.0288301
rs475831	chr8	promoter	286	ANK1	PPARG_1	0.032451	0.262622	0.0013078	0.0289433
rs475831	chr8	promoter	286	ANK1	ELK4_2	0.201464	0.00166792	0.00134357	0.0295425
rs1137177	chr8	promoter	286	ANK1	CREB3_1	0.00463218	0.200874	0.00136363	0.029713
rs4737021	chr8	promoter	286	ANK1	SETDB1_disc2	0.656921	0.0124788	0.00137031	0.0297757
rs6989203	chr8	promoter	286	ANK1	GATA_1	0.00932486	0.345272	0.00138679	0.0298389
rs4737021	chr8	promoter	286	ANK1	HNF4_1	0.124898	0.00931939	0.0014514	0.0303321
rs1137177	chr8	promoter	286	ANK1	RXRA_disc5	0.00772579	0.197255	0.00145239	0.0303321
rs475831	chr8	promoter	286	ANK1	SPDEF_2	0.293655	0.00296143	0.00145513	0.0303321
rs1137177	chr8	promoter	286	ANK1	PAX6_2	0.224624	0.0136861	0.00152683	0.0310727
rs1137177	chr8	promoter	286	ANK1	FOXN1_1	0.00108958	0.0630477	0.00154498	0.031315
rs508419	chr8	promoter	286	ANK1	YY1_disc5	0.234792	0.00990552	0.00157266	0.0315581
rs6989203	chr8	promoter	286	ANK1	POU3F3_1	0.0178233	0.000899844	0.00158696	0.0316532
rs4737021	chr8	promoter	286	ANK1	TCF3_1	0.0772576	0.00654999	0.0015914	0.0316532
rs475831	chr8	promoter	286	ANK1	ETS1_4	0.532233	0.00521492	0.00160174	0.0316942
rs4737021	chr8	promoter	286	ANK1	IRF5_1	0.00220197	0.0576551	0.00161119	0.0317124
rs4737021	chr8	promoter	286	ANK1	ZEB1_4	0.0146269	0.41877	0.00162964	0.0318759
rs6989203	chr8	promoter	286	ANK1	BCL_disc3	0.223604	0.0171225	0.0016337	0.031927
rs1137177	chr8	promoter	286	ANK1	CREB_1	0.000472546	0.173372	0.00164673	0.0320263
rs4737021	chr8	promoter	286	ANK1	HOXA4_1	0.00911749	0.223789	0.00171516	0.0326718
rs1137177	chr8	promoter	286	ANK1	SOX11_2	0.157734	0.0237145	0.00172788	0.0326718
rs6989203	chr8	promoter	286	ANK1	SOX11_2	0.00432342	0.0306265	0.00172788	0.0326718
rs4737021	chr8	promoter	286	ANK1	E2F_disc8	0.215692	0.00715717	0.00180347	0.0331177
rs6989203	chr8	promoter	286	ANK1	GATA4_2	0.00645404	0.490686	0.00185271	0.0335103
rs4737021	chr8	promoter	286	ANK1	AP1_disc10	0.202657	0.0102369	0.00187775	0.0335509
rs6989203	chr8	promoter	286	ANK1	SRY_7	0.00164561	0.0539028	0.00190199	0.0335576
rs6989203	chr8	promoter	286	ANK1	MYEF2_2	0.288439	0.0179517	0.00191545	0.033687
rs1137177	chr8	promoter	286	ANK1	YY1_disc4	0.0118258	0.176883	0.00195657	0.0337779
rs6989203	chr8	promoter	286	ANK1	GATA3_1	0.00548244	0.628293	0.00198921	0.0338288
rs6989203	chr8	promoter	286	ANK1	POU2F2_3	0.0294532	0.00115424	0.00203302	0.0340808
rs1137177	chr8	promoter	286	ANK1	FOXO1_4	0.380142	0.0174667	0.00209468	0.0344233
rs1137177	chr8	promoter	286	ANK1	ESR1_2	0.762262	0.015859	0.00209523	0.0344233
rs508419	chr8	promoter	286	ANK1	SETDB1_disc2	0.683254	0.0211782	0.00210772	0.0344233
rs475831	chr8	promoter	286	ANK1	GABPA_1	0.0111936	0.000175819	0.00213333	0.0345547
rs4737021	chr8	promoter	286	ANK1	IRF7_3	0.0115603	0.244698	0.00214659	0.034562
rs4737021	chr8	promoter	286	ANK1	POU2F2_disc2	0.264099	0.0176662	0.00214762	0.034562
rs508419	chr8	promoter	286	ANK1	COMP1_1	0.196463	0.0150781	0.00215233	0.034562
rs475831	chr8	promoter	286	ANK1	E2F1_3	0.349041	0.0256737	0.00215334	0.034562
rs4737021	chr8	promoter	286	ANK1	IRF8_3	0.00599911	0.17919	0.00221921	0.0350937
rs475831	chr8	promoter	286	ANK1	SPDEF_5	0.0822151	0.00150694	0.00222138	0.0350937
rs4737021	chr8	promoter	286	ANK1	EGR_1	0.400134	0.0339425	0.00222938	0.0350937
rs508419	chr8	promoter	286	ANK1	ZBTB33_disc3	0.0852666	0.00533954	0.0022704	0.0353211
rs475831	chr8	promoter	286	ANK1	FLI1_1	0.162507	0.00302479	0.0022744	0.0353211
rs1137177	chr8	promoter	286	ANK1	SP4_2	0.0370433	0.675564	0.0022955	0.0353712
rs4737021	chr8	promoter	286	ANK1	FOXK1_3	0.017567	0.812908	0.00234226	0.0356081
rs475831	chr8	promoter	286	ANK1	ETV2_1	0.261018	0.012455	0.0023647	0.0356081
rs508419	chr8	promoter	286	ANK1	TFAP2C_7	0.244526	0.0343393	0.00236723	0.0356081
rs1137177	chr8	promoter	286	ANK1	TBX21_4	0.801309	0.0273292	0.00240178	0.0357346
rs4737021	chr8	promoter	286	ANK1	CTCF_disc5	0.196817	0.00958843	0.0024039	0.0357346
rs475831	chr8	promoter	286	ANK1	FLI1_3	0.262067	0.00346444	0.00241411	0.0357346
rs6989203	chr8	promoter	286	ANK1	GATA3_3	0.0173349	0.322408	0.00243655	0.0357346
rs1137177	chr8	promoter	286	ANK1	MAF_2	0.92522	0.0111287	0.00243757	0.0357346
rs508419	chr8	promoter	286	ANK1	NFE2_disc4	0.197211	0.0198391	0.00254417	0.0361562
rs4737021	chr8	promoter	286	ANK1	NKX2-1_1	0.525027	0.114703	0.00260272	0.0361562
rs1137177	chr8	promoter	286	ANK1	SIX4_1	0.0551336	0.00157987	0.00265997	0.0363052
rs4737021	chr8	promoter	286	ANK1	NHLH1_5	0.733821	0.0231298	0.00271205	0.0365349
rs475831	chr8	promoter	286	ANK1	GABP_1	0.0232635	0.00133816	0.00272678	0.0365917
rs4737021	chr8	promoter	286	ANK1	PBX1_4	0.563024	0.0426128	0.00275983	0.0366003
rs6989203	chr8	promoter	286	ANK1	LEF1_2	0.311673	0.0179862	0.00276777	0.0366003
rs475831	chr8	promoter	286	ANK1	ETV5_1	0.118651	0.00238082	0.00277341	0.0366003
rs1137177	chr8	promoter	286	ANK1	PROX1_1	0.000363425	0.00745095	0.00278862	0.0366317
rs475831	chr8	promoter	286	ANK1	CENPB_1	0.356428	0.0154981	0.00281628	0.0367461
rs1137177	chr8	promoter	286	ANK1	SIX3_1	0.340637	0.0156438	0.00285176	0.036883
rs6989203	chr8	promoter	286	ANK1	PBX3_disc2	0.00479559	0.167963	0.00286654	0.0370309
rs4737021	chr8	promoter	286	ANK1	TATA_disc8	0.0218546	0.00124546	0.00287066	0.0370409
rs4737021	chr8	promoter	286	ANK1	NFAT_2	0.00738321	0.221414	0.00290924	0.0370938
rs508419	chr8	promoter	286	ANK1	SIN3A_disc5	0.113416	0.00635229	0.00294862	0.0374149
rs508419	chr8	promoter	286	ANK1	BRCA1_disc1	0.337334	0.0208408	0.00298317	0.0376052
rs6989203	chr8	promoter	286	ANK1	SOX18_2	0.0022838	0.0554845	0.00309117	0.0379531
rs4737021	chr8	promoter	286	ANK1	IRF_2	0.000880404	0.0192625	0.0031237	0.0380865
rs1137177	chr8	promoter	286	ANK1	SOX17_4	0.655606	0.0347535	0.00322488	0.0385975
rs6989203	chr8	promoter	286	ANK1	NANOG_1	0.0452825	0.771222	0.00323795	0.038712
rs508419	chr8	promoter	286	ANK1	E2F1_13	0.260651	0.0112256	0.00328333	0.038894
rs508419	chr8	promoter	286	ANK1	ESRRA_1	0.0286113	0.516813	0.00332831	0.0389923
rs508419	chr8	promoter	286	ANK1	YY1_disc4	0.0418515	0.00354805	0.00339453	0.0393517
rs475831	chr8	promoter	286	ANK1	GABPA_3	0.0165022	0.000438488	0.00341889	0.0394205
rs475831	chr8	promoter	286	ANK1	ELF3_2	0.0430102	0.0016995	0.00343726	0.0394205
rs4737021	chr8	promoter	286	ANK1	SP4_2	0.84437	0.0698245	0.00344072	0.0394205
rs475831	chr8	promoter	286	ANK1	SPDEF_6	0.371254	0.0115117	0.00344805	0.0394556
rs475831	chr8	promoter	286	ANK1	ERG_3	0.221691	0.0037221	0.00348776	0.0394872
rs4737021	chr8	promoter	286	ANK1	REST_disc5	0.214649	0.0158298	0.00353043	0.0394934
rs4737021	chr8	promoter	286	ANK1	IRF9_3	0.013439	0.320606	0.00356383	0.0395739
rs508419	chr8	promoter	286	ANK1	RXRA_6	0.00763102	0.0544609	0.0035811	0.0396628
rs475831	chr8	promoter	286	ANK1	FLI1_4	0.511275	0.0440328	0.00358712	0.0396628
rs475831	chr8	promoter	286	ANK1	STAT1_2	0.038652	0.00239524	0.00360376	0.0397185
rs6989203	chr8	promoter	286	ANK1	GATA5_1	0.00937204	0.222565	0.00360965	0.0397574
rs475831	chr8	promoter	286	ANK1	PAX1_1	0.00632204	0.000433991	0.00379607	0.0404705
rs4737021	chr8	promoter	286	ANK1	PRDM1_2	0.00416118	0.0438057	0.00383643	0.0406053
rs4737021	chr8	promoter	286	ANK1	TLX2_1	0.0148224	0.39827	0.0038421	0.0406264
rs1137177	chr8	promoter	286	ANK1	SIX2_1	0.453272	0.0242586	0.00399485	0.0413094
rs475831	chr8	promoter	286	ANK1	ERF_1	0.124168	0.00195119	0.00406334	0.0415901
rs4737021	chr8	promoter	286	ANK1	OSR1_1	0.0450607	0.00211287	0.00423393	0.0422097
rs1137177	chr8	promoter	286	ANK1	SIX6_3	0.505757	0.0379096	0.00430317	0.0425826
rs4737021	chr8	promoter	286	ANK1	NHLH1_2	0.361042	0.0346639	0.00435065	0.0427003
rs6989203	chr8	promoter	286	ANK1	GATA1_6	0.00729538	0.319862	0.00443511	0.0431848
rs4737021	chr8	promoter	286	ANK1	NR2F1_1	0.148734	0.00768419	0.00445809	0.0432693
rs6989203	chr8	promoter	286	ANK1	HOXB7_1	0.377233	0.0231077	0.00448459	0.0432859
rs475831	chr8	promoter	286	ANK1	REST_disc9	6.53e-07	7.32e-06	0.00455172	0.0436195
rs475831	chr8	promoter	286	ANK1	SIN3A_disc6	0.155113	0.0196456	0.00469681	0.044292
rs1137177	chr8	promoter	286	ANK1	ZEB1_4	0.500202	0.0290742	0.00471346	0.0443353
rs508419	chr8	promoter	286	ANK1	ARNTL_1	0.0133112	0.602267	0.00472471	0.0444034
rs4737021	chr8	promoter	286	ANK1	NFY_1	0.0291549	0.39712	0.0047415	0.044421
rs6989203	chr8	promoter	286	ANK1	SOX9_7	0.0107209	0.126113	0.0048122	0.0445128
rs4737021	chr8	promoter	286	ANK1	GABP_1	0.0464159	0.00356827	0.00481252	0.0445128
rs475831	chr8	promoter	286	ANK1	E2F1_5	0.22117	0.0110952	0.00481475	0.0445128
rs6989203	chr8	promoter	286	ANK1	ZNF35_1	0.189658	0.0101972	0.00494846	0.0451879
rs475831	chr8	promoter	286	ANK1	EHF_1	0.234405	0.0121735	0.00499316	0.0454226
rs1137177	chr8	promoter	286	ANK1	XBP1_4	0.00394219	0.101789	0.00500731	0.0454998
rs475831	chr8	promoter	286	ANK1	ELK3_1	0.0355397	0.000605617	0.00501652	0.0455042
rs1137177	chr8	promoter	286	ANK1	MNT_1	0.654648	0.0183894	0.00509685	0.0458242
rs1137177	chr8	promoter	286	ANK1	BDP1_disc1	0.057623	0.430725	0.00511821	0.0458723
rs6989203	chr8	promoter	286	ANK1	POU3F1_3	0.0397063	0.0022679	0.00516425	0.0459182
rs4737021	chr8	promoter	286	ANK1	MYB_2	0.0118788	0.471804	0.00520493	0.0459182
rs4737021	chr8	promoter	286	ANK1	IRF8_2	0.000416825	0.00802406	0.00528323	0.0459182
rs1137177	chr8	promoter	286	ANK1	NR2F6_5	0.352696	0.0198578	0.00534625	0.0461059
rs508419	chr8	promoter	286	ANK1	E2F1_5	0.39332	0.0211991	0.00539423	0.0462246
rs475831	chr8	promoter	286	ANK1	ETV4_2	0.0809837	0.00183682	0.00541118	0.0462474
rs1137177	chr8	promoter	286	ANK1	RAD21_disc7	0.0391927	0.276826	0.00543351	0.046342
rs1137177	chr8	promoter	286	ANK1	TFAP2_3	0.0432889	0.547162	0.00545718	0.046342
rs475831	chr8	promoter	286	ANK1	RFX1_4	0.152265	0.00715454	0.00545841	0.046342
rs4737021	chr8	promoter	286	ANK1	NRF1_disc3	0.11189	0.00551742	0.00548969	0.0464296
rs1137177	chr8	promoter	286	ANK1	ATF3_disc4	0.01334	0.257192	0.00550021	0.0464457
rs4737021	chr8	promoter	286	ANK1	NFAT_1	0.0221912	0.535627	0.00552838	0.0464629
rs6989203	chr8	promoter	286	ANK1	AP1_3	0.0600246	0.557449	0.0055314	0.0464629
rs508419	chr8	promoter	286	ANK1	SP2_disc2	0.0571954	0.00584327	0.00555917	0.0465197
rs1137177	chr8	promoter	286	ANK1	CREB1_8	0.0018072	0.229819	0.00565783	0.0468647
rs508419	chr8	promoter	286	ANK1	ZBTB33_disc2	0.161294	0.0097486	0.00580939	0.0473687
rs6989203	chr8	promoter	286	ANK1	FOXB1_4	0.839107	0.043119	0.00587104	0.047496
rs508419	chr8	promoter	286	ANK1	ESRRA_4	0.0181608	0.181831	0.00595943	0.0477747
rs6989203	chr8	promoter	286	ANK1	AP1_1	0.00863959	0.281597	0.00609027	0.0481094
rs1137177	chr8	promoter	286	ANK1	REST_disc4	0.0521746	0.478154	0.00609509	0.0481136
rs6989203	chr8	promoter	286	ANK1	POU3F2_5	0.0461738	0.00295801	0.00616641	0.0483863
rs1137177	chr8	promoter	286	ANK1	E2F1_17	0.0531447	0.491703	0.00619336	0.0484742
rs508419	chr8	promoter	286	ANK1	E2F_disc5	0.310614	0.0188811	0.00622789	0.0485731
rs508419	chr8	promoter	286	ANK1	E2F1_19	0.473993	0.0371522	0.00624662	0.0485731
rs6989203	chr8	promoter	286	ANK1	SOX18_3	0.00309977	0.0305003	0.00625608	0.0485731
rs508419	chr8	promoter	286	ANK1	PBX3_disc3	0.0844447	0.00597488	0.00626568	0.0485731
rs1137177	chr8	promoter	286	ANK1	ELF1_disc2	0.0296649	0.269403	0.00628745	0.0485922
rs475831	chr8	promoter	286	ANK1	YY1_disc5	0.185858	0.0184423	0.00629912	0.0485941
rs508419	chr8	promoter	286	ANK1	ELF1_disc2	0.436972	0.0591944	0.00635193	0.0487841
rs4737021	chr8	promoter	286	ANK1	ELK1_4	0.00168169	3.85e-05	0.00638096	0.0488545
rs6989203	chr8	promoter	286	ANK1	FOXI1_2	0.525929	0.0921121	0.00648562	0.0492321
rs6989203	chr8	promoter	286	ANK1	MEF2A_3	0.12746	0.0156404	0.00649657	0.0492497
rs508419	chr8	promoter	286	ANK1	ATF1_3	0.01673	0.224033	0.0065481	0.0493504
rs6989203	chr8	promoter	286	ANK1	GATA3_2	0.0144838	0.954464	0.00654825	0.0493504
rs475831	chr8	promoter	286	ANK1	AP1_disc10	0.114885	0.00790505	0.00667036	0.0496788
rs6989203	chr8	promoter	286	ANK1	TBP_6	0.314055	0.0345519	0.00670088	0.0498558
rs4737021	chr8	promoter	286	ANK1	MTF1_1	0.0542171	0.00396859	0.00683416	0.0502397
rs508419	chr8	promoter	286	ANK1	MYC_disc10	0.24058	0.0251058	0.00688291	0.0504159
rs6989203	chr8	promoter	286	ANK1	FOXA_disc2	0.0583787	0.0044219	0.00689823	0.0504428
rs508419	chr8	promoter	286	ANK1	CCNT2_disc2	0.159603	0.00646969	0.0069243	0.0504939
rs1137177	chr8	promoter	286	ANK1	TEAD2_1	0.0461138	0.461624	0.00695694	0.0504939
rs1137177	chr8	promoter	286	ANK1	MYC_disc8	5.23e-05	0.00240874	0.00698881	0.0505801
rs475831	chr8	promoter	286	ANK1	HAND1_2	0.0193006	0.472776	0.0070618	0.0507505
rs475831	chr8	promoter	286	ANK1	ETV1_1	0.0517427	0.00129178	0.00707122	0.0508017
rs6989203	chr8	promoter	286	ANK1	SOX8_9	0.0104363	0.0597516	0.00711327	0.0509909
rs4737021	chr8	promoter	286	ANK1	HDAC2_disc3	0.31068	0.0331566	0.00719739	0.0511804
rs6989203	chr8	promoter	286	ANK1	PBX1_2	0.0284059	0.39247	0.00720285	0.0511844
rs6989203	chr8	promoter	286	ANK1	HOXA5_1	0.11198	0.0176534	0.00723902	0.0512149
rs1137177	chr8	promoter	286	ANK1	ETS_disc7	0.0633702	0.554394	0.00726523	0.0512149
rs6989203	chr8	promoter	286	ANK1	SOX3_2	0.00573509	0.0859392	0.00729389	0.0512169
rs4737021	chr8	promoter	286	ANK1	EGR1_2	0.36253	0.0320146	0.00729482	0.0512169
rs475831	chr8	promoter	286	ANK1	BCL_disc8	0.22725	0.0328321	0.00730303	0.0512169
rs1137177	chr8	promoter	286	ANK1	TBX20_4	0.235015	0.0122504	0.00732953	0.0512787
rs508419	chr8	promoter	286	ANK1	EBF1_disc2	0.209256	0.0247506	0.00734006	0.0512787
rs6989203	chr8	promoter	286	ANK1	HOXA7_3	0.347277	0.0327272	0.00742853	0.0514965
rs6989203	chr8	promoter	286	ANK1	NFE2L1_1	0.0222255	0.323626	0.00744159	0.0514965
rs4737021	chr8	promoter	286	ANK1	RORA_5	0.00398719	0.0338218	0.00745721	0.0515186
rs6989203	chr8	promoter	286	ANK1	RHOXF2_1	0.2498	0.0255793	0.00745952	0.0515186
rs1137177	chr8	promoter	286	ANK1	ZNF524_1	0.429739	0.0423358	0.00747786	0.0515655
rs1137177	chr8	promoter	286	ANK1	E2F1_6	0.022075	0.334223	0.00758179	0.0518979
rs4737021	chr8	promoter	286	ANK1	TEF_2	0.810793	0.0601834	0.00761482	0.0520232
rs1137177	chr8	promoter	286	ANK1	ZNF143_disc4	0.0591548	0.389827	0.00766789	0.0521706
rs1137177	chr8	promoter	286	ANK1	FOXO3_4	0.218338	0.0280539	0.00769769	0.0522174
rs6989203	chr8	promoter	286	ANK1	SOX21_3	0.262806	0.0147083	0.0077806	0.0524314
rs475831	chr8	promoter	286	ANK1	YY1_disc3	0.24656	0.0173039	0.00779946	0.0524433
rs1137177	chr8	promoter	286	ANK1	ZNF589_1	0.0263839	0.00140357	0.00790708	0.0526404
rs6989203	chr8	promoter	286	ANK1	MYEF2_3	0.288327	0.0208145	0.00797397	0.0528306
rs6989203	chr8	promoter	286	ANK1	MEF2A_1	0.14727	0.0189326	0.00802445	0.0529543
rs4737021	chr8	promoter	286	ANK1	ITGB2_1	0.00733601	0.109923	0.00805032	0.0530033
rs6989203	chr8	promoter	286	ANK1	NOBOX_1	0.646841	0.0383676	0.00806699	0.0530347
rs4737021	chr8	promoter	286	ANK1	EGR_2	0.69247	0.0777626	0.00809087	0.053078
rs1137177	chr8	promoter	286	ANK1	REST_disc9	0.0264336	0.192069	0.00816306	0.0534092
rs475831	chr8	promoter	286	ANK1	ELK4_1	0.0239036	0.00142548	0.00819751	0.0534097
rs6989203	chr8	promoter	286	ANK1	ESRRG_3	0.0579306	0.982211	0.00821094	0.0534097
rs6989203	chr8	promoter	286	ANK1	ZNF75A_1	0.0670114	0.774885	0.00828407	0.0535053
rs508419	chr8	promoter	286	ANK1	RAD21_disc3	0.0913928	0.0109664	0.00831362	0.0535053
rs6989203	chr8	promoter	286	ANK1	EN2_1	0.273273	0.0250593	0.00844908	0.0537948
rs4737021	chr8	promoter	286	ANK1	NANOG_1	0.00425346	0.0390707	0.00845641	0.0537948
rs6989203	chr8	promoter	286	ANK1	MEOX2_3	0.00107975	0.00844295	0.00850295	0.0538107
rs475831	chr8	promoter	286	ANK1	E2F1_6	0.145493	0.0100493	0.00855666	0.0538856
rs475831	chr8	promoter	286	ANK1	TATA_disc1	0.0299461	0.388115	0.00866231	0.054143
rs4737021	chr8	promoter	286	ANK1	BCL_disc8	0.294962	0.0471898	0.00866234	0.054143
rs475831	chr8	promoter	286	ANK1	PBX1_4	0.0490648	0.569735	0.0086714	0.0541687
rs475831	chr8	promoter	286	ANK1	SPDEF_1	0.170645	0.0152099	0.00874336	0.0543563
rs4737021	chr8	promoter	286	ANK1	IRF7_2	0.00150806	0.0166435	0.00877437	0.0544862
rs508419	chr8	promoter	286	ANK1	TFAP2C_8	0.483538	0.0347716	0.00891662	0.0548335
rs508419	chr8	promoter	286	ANK1	FIGLA_1	0.0423142	0.869708	0.00898253	0.0550183
rs508419	chr8	promoter	286	ANK1	EP300_disc8	0.25665	0.0206114	0.0091085	0.0553206
rs6989203	chr8	promoter	286	ANK1	GATA3_5	0.0077995	0.206324	0.00913857	0.0553268
rs475831	chr8	promoter	286	ANK1	E2F1_13	0.108323	0.00868762	0.0091422	0.0553268
rs6989203	chr8	promoter	286	ANK1	SOX1_2	0.0193219	0.259446	0.00914274	0.0553268
rs4737021	chr8	promoter	286	ANK1	SPI1_3	0.0371132	0.00431269	0.00919915	0.0553268
rs6989203	chr8	promoter	286	ANK1	FOXC1_6	0.432037	0.0454592	0.00921523	0.0553268
rs4737021	chr8	promoter	286	ANK1	SRF_disc2	0.38355	0.058797	0.0092178	0.0553268
rs475831	chr8	promoter	286	ANK1	ZKSCAN3_1	0.0437482	0.767071	0.00924675	0.0554404
rs508419	chr8	promoter	286	ANK1	TFAP2_3	0.0933304	0.0121225	0.00926771	0.0554985
rs475831	chr8	promoter	286	ANK1	TATA_disc8	0.0801132	0.00676842	0.00929092	0.0555099
rs1137177	chr8	promoter	286	ANK1	SIX1_1	0.328	0.0132836	0.00932056	0.055597
rs6989203	chr8	promoter	286	ANK1	SOX9_8	0.0470463	0.25342	0.00934953	0.055654
rs6989203	chr8	promoter	286	ANK1	FOXD2_1	0.115748	0.0114733	0.00937467	0.055654
rs508419	chr8	promoter	286	ANK1	RXRB_2	0.00589627	0.107771	0.00938039	0.055654
rs1137177	chr8	promoter	286	ANK1	TBX5_3	0.252163	0.0230027	0.00944304	0.055799
rs4737021	chr8	promoter	286	ANK1	EGR1_6	0.225147	0.00744285	0.00948051	0.0559333
rs1137177	chr8	promoter	286	ANK1	E2F1_8	0.0209044	0.346801	0.0095094	0.0559464
rs508419	chr8	promoter	286	ANK1	ZEB1_disc1	0.0228279	0.356063	0.00951032	0.0559464
rs508419	chr8	promoter	286	ANK1	TBX5_3	0.00180938	0.0180014	0.00952386	0.0559464
rs4737021	chr8	promoter	286	ANK1	GLIS3_1	0.695881	0.130778	0.00954869	0.0559464
rs4737021	chr8	promoter	286	ANK1	NFE2_disc4	0.300445	0.0422108	0.00955649	0.0559464
rs1137177	chr8	promoter	286	ANK1	POU5F1_disc1	0.975809	0.0855714	0.00957731	0.0559778
rs4737021	chr8	promoter	286	ANK1	TATA_disc4	0.486072	0.0729367	0.00959042	0.0559998
rs1137177	chr8	promoter	286	ANK1	SIX6_2	0.425882	0.0359056	0.009668	0.0561566
rs6989203	chr8	promoter	286	ANK1	GATA3_4	0.00790317	0.334969	0.00973241	0.056221
rs475831	chr8	promoter	286	ANK1	SIN3A_disc7	0.0119856	0.00105999	0.00977781	0.0562777
rs508419	chr8	promoter	286	ANK1	TCF4_1	0.0446303	0.799919	0.0097981	0.0563061
rs508419	chr8	promoter	286	ANK1	TATA_disc10	0.0483838	0.00320734	0.00982171	0.0563061
rs4737021	chr8	promoter	286	ANK1	IRF8_1	0.000509559	0.0079832	0.00982583	0.0563061
rs6989203	chr8	promoter	286	ANK1	POU2F1_11	0.0477988	0.00675629	0.00983481	0.0563222
rs6989203	chr8	promoter	286	ANK1	CREB1_7	0.0506014	0.889976	0.00986185	0.0563894
rs475831	chr8	promoter	286	ANK1	SPIC_2	0.512129	0.0343323	0.00987875	0.0563894
rs475831	chr8	promoter	286	ANK1	EHF_2	0.0204332	0.00126516	0.00994111	0.0564572
rs6989203	chr8	promoter	286	ANK1	AFP_1	0.320127	0.0455622	0.00994963	0.0564751
rs1137177	chr8	promoter	286	ANK1	HIC1_3	0.563778	0.0530667	0.0100859	0.0567687
rs6989203	chr8	promoter	286	ANK1	GATA6_2	0.0298992	0.453137	0.0101217	0.0567808
rs6989203	chr8	promoter	286	ANK1	SOX21_1	0.0370583	0.00479363	0.0101916	0.0569719
rs6989203	chr8	promoter	286	ANK1	FOXL1_4	0.929839	0.0243557	0.0102828	0.0570111
rs6989203	chr8	promoter	286	ANK1	POU3F2_3	0.0427618	0.301548	0.0102855	0.0570111
rs475831	chr8	promoter	286	ANK1	E2F1_14	0.115257	0.00958375	0.0102858	0.0570111
rs6989203	chr8	promoter	286	ANK1	POU3F2_1	0.146567	0.0131282	0.0102966	0.0570111
rs4737021	chr8	promoter	286	ANK1	BCL_disc10	0.494693	0.0810358	0.0103425	0.0570534
rs475831	chr8	promoter	286	ANK1	SPDEF_3	0.176333	0.00506586	0.0104029	0.0571992
rs6989203	chr8	promoter	286	ANK1	POU2F1_2	0.0372424	0.00262559	0.0105686	0.057577
rs4737021	chr8	promoter	286	ANK1	IRF2_1	0.0252736	0.15124	0.0105832	0.057577
rs6989203	chr8	promoter	286	ANK1	FOXO3_2	0.392658	0.0698906	0.0105928	0.0575857
rs508419	chr8	promoter	286	ANK1	TFAP2A_8	0.393345	0.0853072	0.0106889	0.0576996
rs475831	chr8	promoter	286	ANK1	ZFX_1	0.00495093	0.0578167	0.0108345	0.0576996
rs4737021	chr8	promoter	286	ANK1	ZKSCAN3_1	0.437993	0.0490967	0.0108477	0.0576996
rs4737021	chr8	promoter	286	ANK1	PRDM1_disc1	0.0311416	0.289199	0.0108812	0.0576996
rs6989203	chr8	promoter	286	ANK1	SOX10_9	0.0640001	0.339912	0.0108949	0.0576996
rs475831	chr8	promoter	286	ANK1	SP1_disc3	0.0427811	0.445528	0.0109032	0.0576996
rs6989203	chr8	promoter	286	ANK1	SOX7_2	0.396173	0.0698101	0.0110109	0.0579151
rs4737021	chr8	promoter	286	ANK1	PAX5_disc2	0.465161	0.0303371	0.0110768	0.0580057
rs508419	chr8	promoter	286	ANK1	BCL_disc10	0.261022	0.0434747	0.0110896	0.0580473
rs508419	chr8	promoter	286	ANK1	ELK1_1	0.286914	0.0359535	0.0111099	0.0580473
rs6989203	chr8	promoter	286	ANK1	CPEB1_1	0.0851691	0.00644918	0.0111255	0.0580567
rs6989203	chr8	promoter	286	ANK1	NKX3-1_1	0.41281	0.0444913	0.0111606	0.0581135
rs6989203	chr8	promoter	286	ANK1	YY1_6	0.0453853	0.673814	0.0111657	0.0581135
rs1137177	chr8	promoter	286	ANK1	SIX6_1	0.619801	0.0512866	0.0111838	0.0581441
rs6989203	chr8	promoter	286	ANK1	POU3F3_3	0.0565914	0.00488598	0.0112676	0.0583362
rs475831	chr8	promoter	286	ANK1	E2F1_8	0.13688	0.00974089	0.0112928	0.0584382
rs4737021	chr8	promoter	286	ANK1	EGR1_1	0.559876	0.0960504	0.0113983	0.0587481
rs6989203	chr8	promoter	286	ANK1	FOXC2_2	0.458712	0.0446025	0.0114274	0.0588362
rs1137177	chr8	promoter	286	ANK1	SOX21_4	0.868534	0.0830652	0.0114354	0.058843
rs6989203	chr8	promoter	286	ANK1	POU3F4_3	0.0967752	0.00876077	0.0116077	0.0590347
rs475831	chr8	promoter	286	ANK1	SPI1_2	0.492375	0.0280952	0.0117032	0.0591934
rs475831	chr8	promoter	286	ANK1	ERG_1	0.100421	0.00426773	0.0117077	0.0591934
rs4737021	chr8	promoter	286	ANK1	TCF4_1	0.78452	0.0506442	0.0117783	0.0592452
rs508419	chr8	promoter	286	ANK1	OVOL2_1	0.0315978	0.640913	0.0117818	0.0592452
rs4737021	chr8	promoter	286	ANK1	SOX9_8	0.0988081	0.441808	0.0118321	0.059367
rs508419	chr8	promoter	286	ANK1	RAD21_disc4	0.0193872	0.360633	0.0118377	0.0593809
rs4737021	chr8	promoter	286	ANK1	TCF12_disc5	0.285889	0.0266459	0.0119458	0.0596401
rs6989203	chr8	promoter	286	ANK1	SOX5_3	0.191788	0.0192888	0.0121765	0.0601564
rs1137177	chr8	promoter	286	ANK1	NR1H4_1	0.360488	0.0772165	0.0121792	0.0601564
rs4737021	chr8	promoter	286	ANK1	AHR_1	0.174333	0.0249547	0.0122314	0.0602329
rs508419	chr8	promoter	286	ANK1	TCF3_5	0.0374361	0.374861	0.0122334	0.0602329
rs1137177	chr8	promoter	286	ANK1	SPZ1_1	0.0847887	0.502766	0.0123346	0.0604048
rs6989203	chr8	promoter	286	ANK1	DLX5_2	0.265571	0.0179198	0.0123405	0.0604048
rs4737021	chr8	promoter	286	ANK1	RAD21_disc8	0.481477	0.124519	0.0123466	0.0604152
rs475831	chr8	promoter	286	ANK1	E2F1_15	0.27005	0.0154528	0.012414	0.0604948
rs508419	chr8	promoter	286	ANK1	CTCF_disc2	0.302881	0.0525922	0.0126109	0.0606388
rs475831	chr8	promoter	286	ANK1	PAX5_disc4	0.484185	0.0451048	0.0126226	0.0606388
rs4737021	chr8	promoter	286	ANK1	EGR1_disc3	0.297423	0.035115	0.0126324	0.0606388
rs4737021	chr8	promoter	286	ANK1	FOXD1_1	0.112051	0.0102267	0.0126699	0.0606436
rs508419	chr8	promoter	286	ANK1	ERG_2	0.163936	0.0167592	0.0127129	0.0606997
rs508419	chr8	promoter	286	ANK1	TCF12_disc4	0.265668	0.0259314	0.0127723	0.0606997
rs475831	chr8	promoter	286	ANK1	SOX14_4	0.0594112	0.586467	0.0128066	0.0606997
rs475831	chr8	promoter	286	ANK1	CACD_1	0.0222369	0.142938	0.0128566	0.0607542
rs475831	chr8	promoter	286	ANK1	ELF5_4	0.0600084	0.00464745	0.0128946	0.0608108
rs4737021	chr8	promoter	286	ANK1	FOXG1_3	0.0838127	0.406733	0.0129502	0.060844
rs1137177	chr8	promoter	286	ANK1	AP1_4	0.000232405	0.00375902	0.0130104	0.0609864
rs508419	chr8	promoter	286	ANK1	MSC_1	0.0256829	0.337326	0.0130142	0.0609864
rs508419	chr8	promoter	286	ANK1	RREB1_2	0.0902303	0.44181	0.0130495	0.0610567
rs1137177	chr8	promoter	286	ANK1	RREB1_1	0.473511	0.125133	0.0130533	0.0610567
rs508419	chr8	promoter	286	ANK1	ESR1_2	0.0344651	0.732877	0.013061	0.0610567
rs1137177	chr8	promoter	286	ANK1	RAD21_disc8	0.117751	0.445612	0.0132436	0.061339
rs508419	chr8	promoter	286	ANK1	EGR1_2	0.0129951	0.103592	0.0132632	0.061339
rs1137177	chr8	promoter	286	ANK1	PAX4_3	0.896083	0.0589943	0.0132738	0.0613589
rs508419	chr8	promoter	286	ANK1	ZFX_1	0.393295	0.0454	0.0132825	0.0613627
rs4737021	chr8	promoter	286	ANK1	SP1_2	0.50924	0.0569472	0.013321	0.0613849
rs4737021	chr8	promoter	286	ANK1	BHLHE23_1	0.874995	0.0592641	0.0133367	0.0614048
rs475831	chr8	promoter	286	ANK1	ELF5_3	0.0884624	0.00663705	0.0134894	0.0616474
rs475831	chr8	promoter	286	ANK1	AIRE_2	0.00988149	0.0586153	0.0135588	0.061733
rs1137177	chr8	promoter	286	ANK1	GMEB2_4	0.0125122	0.692397	0.0135718	0.0617346
rs1137177	chr8	promoter	286	ANK1	GMEB2_2	0.498924	0.0266917	0.0136403	0.0618203
rs508419	chr8	promoter	286	ANK1	MYC_1	0.00844062	0.255105	0.0136408	0.0618203
rs508419	chr8	promoter	286	ANK1	TFAP2A_11	0.442873	0.0904521	0.0136473	0.0618203
rs508419	chr8	promoter	286	ANK1	HERPUD1_1	0.0554482	0.00724932	0.0136825	0.0619026
rs4737021	chr8	promoter	286	ANK1	TCF12_disc4	0.00311782	0.028595	0.0137102	0.0619026
rs6989203	chr8	promoter	286	ANK1	FOXP1_1	0.254694	0.0599934	0.0137418	0.0619367
rs4737021	chr8	promoter	286	ANK1	MSX1_1	0.0575486	0.819899	0.0137425	0.0619367
rs4737021	chr8	promoter	286	ANK1	ARHGEF12_1	0.01981	0.314019	0.0137528	0.0619367
rs475831	chr8	promoter	286	ANK1	TFCP2_1	0.324597	0.0580909	0.0138078	0.0619856
rs508419	chr8	promoter	286	ANK1	MEIS3_3	0.00957771	0.0675993	0.0138938	0.0621126
rs6989203	chr8	promoter	286	ANK1	PRDM1_disc1	0.139149	0.686606	0.0139278	0.0621238
rs508419	chr8	promoter	286	ANK1	TFAP2B_4	0.357728	0.0759659	0.0139958	0.0621238
rs1137177	chr8	promoter	286	ANK1	MYC_disc10	0.109883	0.561113	0.0140309	0.0621238
rs4737021	chr8	promoter	286	ANK1	ASCL2_1	0.393676	0.0537946	0.0141135	0.0621441
rs4737021	chr8	promoter	286	ANK1	MAF_1	0.115937	0.0151674	0.0141237	0.062145
rs1137177	chr8	promoter	286	ANK1	SP2_disc3	0.148292	0.551718	0.0141348	0.062147
rs4737021	chr8	promoter	286	ANK1	SP2_disc3	0.551718	0.146206	0.0141348	0.062147
rs508419	chr8	promoter	286	ANK1	E2F1_8	0.326582	0.0328707	0.0142852	0.0624206
rs6989203	chr8	promoter	286	ANK1	SRY_5	0.0100039	0.0550003	0.0143393	0.0625123
rs508419	chr8	promoter	286	ANK1	NR2C2_1	0.00469919	0.0407586	0.0144732	0.062591
rs508419	chr8	promoter	286	ANK1	NR2F1_4	0.0424383	0.880374	0.0145838	0.062752
rs4737021	chr8	promoter	286	ANK1	NEUROG2_2	0.435948	0.0353436	0.0146199	0.0627665
rs4737021	chr8	promoter	286	ANK1	MYF6_2	0.501177	0.0520461	0.0147604	0.0628578
rs508419	chr8	promoter	286	ANK1	PAX5_disc5	0.20325	0.0130655	0.0147804	0.0628578
rs6989203	chr8	promoter	286	ANK1	GATA_disc1	0.0256053	0.376371	0.0148574	0.0629108
rs508419	chr8	promoter	286	ANK1	CREB3_1	0.752621	0.0816804	0.0148936	0.0629812
rs475831	chr8	promoter	286	ANK1	IRF_disc6	0.0237062	0.214033	0.014922	0.0629812
rs1137177	chr8	promoter	286	ANK1	ESR1_3	0.257707	0.0439806	0.0149626	0.0630659
rs4737021	chr8	promoter	286	ANK1	TFAP4_2	0.219564	0.0230282	0.0149974	0.0630659
rs475831	chr8	promoter	286	ANK1	RUNX3_4	0.323014	0.0309829	0.0150015	0.0630659
rs508419	chr8	promoter	286	ANK1	PATZ1_1	0.00571895	0.0372876	0.0150464	0.0631819
rs1137177	chr8	promoter	286	ANK1	SRF_2	0.0408832	0.354589	0.0150522	0.0631859
rs508419	chr8	promoter	286	ANK1	SNAI2_1	0.0265889	0.405628	0.0150677	0.0631859
rs4737021	chr8	promoter	286	ANK1	DBP_1	0.600745	0.0356338	0.0151108	0.0632402
rs1137177	chr8	promoter	286	ANK1	SMC3_disc2	0.0247309	0.167822	0.0151565	0.0632978
rs508419	chr8	promoter	286	ANK1	RXRA_10	0.00803046	0.0702696	0.0151968	0.0633296
rs4737021	chr8	promoter	286	ANK1	MYOG_1	0.167521	0.018337	0.0152111	0.0633296
rs1137177	chr8	promoter	286	ANK1	CTCF_disc8	0.115401	0.480445	0.0152126	0.0633296
rs475831	chr8	promoter	286	ANK1	NFE2_disc3	0.132757	0.0161905	0.0152719	0.0634132
rs6989203	chr8	promoter	286	ANK1	POU2F1_7	0.0324529	0.274648	0.0153135	0.0634447
rs508419	chr8	promoter	286	ANK1	TCF4_2	0.0441876	0.560099	0.0153422	0.063473
rs6989203	chr8	promoter	286	ANK1	SOX8_4	0.00872649	0.0649319	0.0154751	0.0635607
rs475831	chr8	promoter	286	ANK1	CHD2_disc3	0.0558633	0.0127181	0.0155092	0.0635654
rs4737021	chr8	promoter	286	ANK1	TCF3_7	0.634838	0.0670345	0.0155327	0.0635654
rs475831	chr8	promoter	286	ANK1	E2F1_16	0.300473	0.0386155	0.0156048	0.0636608
rs4737021	chr8	promoter	286	ANK1	SOX17_2	0.0676782	0.671322	0.0157319	0.0638212
rs6989203	chr8	promoter	286	ANK1	CCDC6_1	0.625187	0.105514	0.0157923	0.0638658
rs508419	chr8	promoter	286	ANK1	BCL_disc7	0.0522342	0.401083	0.0158324	0.0639011
rs508419	chr8	promoter	286	ANK1	E2F1_3	0.60559	0.0946627	0.0158558	0.0639695
rs4737021	chr8	promoter	286	ANK1	REST_disc7	0.0610278	0.00567587	0.0158988	0.0639784
rs475831	chr8	promoter	286	ANK1	ELK1_2	0.0421765	0.00381939	0.0159026	0.0639784
rs6989203	chr8	promoter	286	ANK1	FOXC1_4	0.0987446	0.0130707	0.0159116	0.0639784
rs4737021	chr8	promoter	286	ANK1	RORA_2	0.00470206	0.0367407	0.0160073	0.0641374
rs6989203	chr8	promoter	286	ANK1	THRB_2	0.0711034	0.416162	0.0160363	0.0641374
rs4737021	chr8	promoter	286	ANK1	SP1_disc2	0.195606	0.695422	0.0160445	0.0641374
rs508419	chr8	promoter	286	ANK1	USF_5	0.0161176	0.141929	0.0163609	0.0644904
rs4737021	chr8	promoter	286	ANK1	ZNF784_1	0.049628	0.00481871	0.016382	0.0644904
rs475831	chr8	promoter	286	ANK1	SRF_3	0.0608642	0.360831	0.0163847	0.0644904
rs6989203	chr8	promoter	286	ANK1	SOX13_1	0.271887	0.0274935	0.0164046	0.0644904
rs6989203	chr8	promoter	286	ANK1	MEF2B_1	0.0220483	0.00226221	0.0165503	0.0647678
rs508419	chr8	promoter	286	ANK1	ZNF143_1	0.00941323	0.0945178	0.0166666	0.0649635
rs4737021	chr8	promoter	286	ANK1	TCF12_disc1	0.530041	0.0239863	0.0167016	0.0649923
rs1137177	chr8	promoter	286	ANK1	SOX10_2	0.523361	0.0290203	0.0167838	0.0651454
rs1137177	chr8	promoter	286	ANK1	MEIS2_2	0.109906	0.00846297	0.0167948	0.0651454
rs6989203	chr8	promoter	286	ANK1	DBP_1	0.0382765	0.605524	0.0167955	0.0651454
rs4737021	chr8	promoter	286	ANK1	BHLHE40_disc2	0.21996	0.0462634	0.0168511	0.0652128
rs475831	chr8	promoter	286	ANK1	ZBTB12_1	0.0221712	0.169421	0.0168553	0.0652128
rs1137177	chr8	promoter	286	ANK1	FOXJ3_5	0.459905	0.0456487	0.0168629	0.0652128
rs508419	chr8	promoter	286	ANK1	POU2F2_disc2	0.338714	0.0705059	0.0171133	0.0654784
rs508419	chr8	promoter	286	ANK1	ESRRG_2	0.00601988	0.0516429	0.0172383	0.0655293
rs1137177	chr8	promoter	286	ANK1	CTCF_disc4	0.87858	0.136072	0.0174181	0.0657134
rs6989203	chr8	promoter	286	ANK1	FOXA_1	0.796439	0.104003	0.0175747	0.0657613
rs4737021	chr8	promoter	286	ANK1	RFX1_1	0.0610596	0.621127	0.0176073	0.0657613
rs475831	chr8	promoter	286	ANK1	CREB1_3	0.469207	0.0430318	0.0177031	0.0657613
rs4737021	chr8	promoter	286	ANK1	IRF9_2	0.00467367	0.043808	0.0177117	0.0657613
rs475831	chr8	promoter	286	ANK1	NHLH1_3	0.0422108	0.403595	0.0177303	0.0657613
rs1137177	chr8	promoter	286	ANK1	GMEB1_1	0.0309053	0.690001	0.0177372	0.0657613
rs4737021	chr8	promoter	286	ANK1	FOXQ1_1	0.115266	0.660696	0.0177443	0.0657613
rs6989203	chr8	promoter	286	ANK1	FOXC1_3	0.503154	0.0876715	0.0177551	0.0657613
rs6989203	chr8	promoter	286	ANK1	AIRE_2	0.481101	0.123408	0.017784	0.0657658
rs4737021	chr8	promoter	286	ANK1	HMBOX1_2	0.0769596	0.883342	0.0178117	0.0657658
rs4737021	chr8	promoter	286	ANK1	HAND1_1	0.0795065	0.632322	0.017836	0.0657672
rs508419	chr8	promoter	286	ANK1	RXRG_1	0.0101104	0.0686325	0.0178453	0.0657784
rs1137177	chr8	promoter	286	ANK1	RXRG_3	0.329174	0.0354593	0.0178727	0.065788
rs4737021	chr8	promoter	286	ANK1	SP100_1	0.00447747	0.0533153	0.0178771	0.065788
rs1137177	chr8	promoter	286	ANK1	TFCP2_2	0.079342	0.457326	0.0179335	0.065788
rs1137177	chr8	promoter	286	ANK1	SOX3_1	0.424631	0.0693844	0.017941	0.065788
rs1137177	chr8	promoter	286	ANK1	HOMEZ_1	0.627725	0.0681099	0.0179684	0.0658157
rs6989203	chr8	promoter	286	ANK1	POU_1	0.0206521	0.196158	0.0180525	0.0659057
rs475831	chr8	promoter	286	ANK1	HIC1_5	0.0756826	0.711163	0.0181308	0.0659905
rs4737021	chr8	promoter	286	ANK1	NR2E3_1	0.202321	0.025951	0.018241	0.0661141
rs6989203	chr8	promoter	286	ANK1	POU4F3_2	0.16634	0.0343601	0.0182939	0.0661723
rs1137177	chr8	promoter	286	ANK1	HINFP_4	0.0318514	0.207465	0.0183475	0.0661994
rs475831	chr8	promoter	286	ANK1	TP63_1	0.0360934	0.247984	0.0183639	0.0661994
rs4737021	chr8	promoter	286	ANK1	BHLHE22_1	0.885408	0.086711	0.0184003	0.066226
rs4737021	chr8	promoter	286	ANK1	RFX1_4	0.0518784	0.665922	0.0184284	0.0662513
rs4737021	chr8	promoter	286	ANK1	YY1_disc3	0.378035	0.0415859	0.0184671	0.0663266
rs4737021	chr8	promoter	286	ANK1	TFCP2_3	0.225322	0.0219332	0.0185015	0.0663436
rs6989203	chr8	promoter	286	ANK1	ISX_4	0.638445	0.0555583	0.0186609	0.0665814
rs4737021	chr8	promoter	286	ANK1	TAL1_4	0.23912	0.0292532	0.0188293	0.0667744
rs1137177	chr8	promoter	286	ANK1	HIC1_5	0.896859	0.0966656	0.0189158	0.0669142
rs475831	chr8	promoter	286	ANK1	E2F1_18	0.141361	0.015184	0.0189186	0.0669142
rs6989203	chr8	promoter	286	ANK1	PAX6_4	0.238015	0.0391201	0.0189331	0.0669142
rs508419	chr8	promoter	286	ANK1	SMAD3_3	0.275644	0.0337134	0.0189632	0.0669153
rs508419	chr8	promoter	286	ANK1	NR2F6_3	0.00760728	0.0507153	0.019013	0.0669827
rs508419	chr8	promoter	286	ANK1	TATA_disc7	0.355045	0.0637066	0.0190802	0.0670514
rs475831	chr8	promoter	286	ANK1	HIC2_1	0.0679002	0.893758	0.0191171	0.0670526
rs475831	chr8	promoter	286	ANK1	FEV_1	0.216134	0.0144562	0.0191207	0.0670526
rs6989203	chr8	promoter	286	ANK1	NFE2_2	0.292532	0.0356283	0.0191929	0.0671951
rs6989203	chr8	promoter	286	ANK1	POU1F1_4	0.0168062	0.00240957	0.0193852	0.0673615
rs508419	chr8	promoter	286	ANK1	TFAP4_5	0.0906516	0.847945	0.0193897	0.0673665
rs6989203	chr8	promoter	286	ANK1	SOX18_1	0.16121	0.0239424	0.019611	0.06749
rs6989203	chr8	promoter	286	ANK1	JDP2_6	0.0274429	0.00345035	0.0196238	0.06749
rs508419	chr8	promoter	286	ANK1	NFIB_1	0.1907	0.0349638	0.0196622	0.06749
rs6989203	chr8	promoter	286	ANK1	MNX1_1	0.28806	0.0413248	0.0197339	0.067491
rs4737021	chr8	promoter	286	ANK1	BCL_disc7	0.0384144	0.00613513	0.0197836	0.0675514
rs508419	chr8	promoter	286	ANK1	HNF4_3	0.0623734	0.448965	0.0200621	0.0677419
rs508419	chr8	promoter	286	ANK1	TFAP2C_5	0.362975	0.0781775	0.0201881	0.0678752
rs508419	chr8	promoter	286	ANK1	AHR::ARNT_2	0.0541832	0.431121	0.0201891	0.0678752
rs475831	chr8	promoter	286	ANK1	TATA_disc3	0.427245	0.0193215	0.020244	0.0679567
rs508419	chr8	promoter	286	ANK1	HES5_1	0.511225	0.08101	0.0205636	0.0681074
rs4737021	chr8	promoter	286	ANK1	HINFP_1	0.49128	0.072905	0.0205996	0.0681074
rs1137177	chr8	promoter	286	ANK1	TFAP2C_8	0.0942829	0.752042	0.0206086	0.0681134
rs4737021	chr8	promoter	286	ANK1	FOXJ3_8	0.0193938	0.113636	0.0206403	0.0681912
rs508419	chr8	promoter	286	ANK1	EOMES_1	0.0166853	0.104609	0.020718	0.0682505
rs475831	chr8	promoter	286	ANK1	E2F1_9	0.160114	0.0184383	0.0207807	0.0683168
rs4737021	chr8	promoter	286	ANK1	SIN3A_disc5	0.231672	0.0451197	0.0208584	0.068438
rs1137177	chr8	promoter	286	ANK1	SIN3A_disc5	0.0744897	0.376479	0.0208595	0.068438
rs475831	chr8	promoter	286	ANK1	SPI1_3	0.129385	0.0225096	0.0208796	0.0684499
rs6989203	chr8	promoter	286	ANK1	FOXB1_1	0.0130927	0.110272	0.0209251	0.0684682
rs508419	chr8	promoter	286	ANK1	CREB1_4	0.318266	0.0710248	0.0209878	0.0684895
rs6989203	chr8	promoter	286	ANK1	NKX2-1_1	0.46379	0.149267	0.0211147	0.0685215
rs475831	chr8	promoter	286	ANK1	HINFP_3	0.0234528	0.0844059	0.0212524	0.068624
rs4737021	chr8	promoter	286	ANK1	EWSR1::FLI1_1	0.1266	0.018789	0.021276	0.0686423
rs508419	chr8	promoter	286	ANK1	E2F1_14	0.540723	0.0733284	0.0212822	0.0686514
rs508419	chr8	promoter	286	ANK1	RARA_2	0.0170513	0.0893046	0.0213769	0.0687598
rs508419	chr8	promoter	286	ANK1	MZF1_2	0.287032	0.0396431	0.0213776	0.0687598
rs4737021	chr8	promoter	286	ANK1	ZBTB7A_disc2	0.304301	0.0301273	0.0214167	0.0688057
rs1137177	chr8	promoter	286	ANK1	TGIF1_1	0.388412	0.0524185	0.0214322	0.0688154
rs508419	chr8	promoter	286	ANK1	TBX5_4	0.00208393	0.0223259	0.0215163	0.0688758
rs1137177	chr8	promoter	286	ANK1	HNF4A_10	0.537993	0.0731539	0.0215771	0.0689056
rs6989203	chr8	promoter	286	ANK1	SOX4_2	0.0772835	0.416137	0.0217533	0.0691493
rs508419	chr8	promoter	286	ANK1	FLI1_2	0.115455	0.015581	0.0219969	0.069351
rs1137177	chr8	promoter	286	ANK1	FOXB1_1	0.01416	0.00181805	0.0221678	0.069425
rs4737021	chr8	promoter	286	ANK1	RAD21_disc10	0.481867	0.0805447	0.022191	0.069425
rs6989203	chr8	promoter	286	ANK1	FOXG1_1	0.184619	0.0268823	0.0223007	0.0695485
rs508419	chr8	promoter	286	ANK1	TCF3_7	0.0462554	0.39299	0.0223224	0.0695653
rs508419	chr8	promoter	286	ANK1	ATF3_disc2	0.124325	0.0229757	0.0224732	0.0697553
rs1137177	chr8	promoter	286	ANK1	ESR1_4	0.266598	0.0434695	0.0225065	0.069815
rs6989203	chr8	promoter	286	ANK1	GBX1_1	0.292075	0.0457503	0.0225254	0.0698441
rs475831	chr8	promoter	286	ANK1	TCF7L1_2	0.0917138	0.770058	0.0225529	0.0698833
rs508419	chr8	promoter	286	ANK1	EBOX_1	0.0448271	0.457183	0.0225639	0.0698833
rs508419	chr8	promoter	286	ANK1	E2F1_22	0.150696	0.0196209	0.0226292	0.069933
rs475831	chr8	promoter	286	ANK1	VDR_3	0.141441	0.632202	0.0226508	0.0699334
rs4737021	chr8	promoter	286	ANK1	ATF4_1	0.157564	0.0274729	0.0227302	0.0700151
rs6989203	chr8	promoter	286	ANK1	FOXL1_5	0.38797	0.0614292	0.0227326	0.0700151
rs6989203	chr8	promoter	286	ANK1	SOX4_1	0.145926	0.0260323	0.0227683	0.0700151
rs475831	chr8	promoter	286	ANK1	ETV3_1	0.00999049	0.000862756	0.0228229	0.0700796
rs1137177	chr8	promoter	286	ANK1	AHR_1	0.333243	0.0749872	0.0228445	0.0700869
rs6989203	chr8	promoter	286	ANK1	SOX15_4	0.0338261	0.180714	0.022881	0.0700869
rs508419	chr8	promoter	286	ANK1	MYOG_1	0.0335821	0.254177	0.0229965	0.0701112
rs4737021	chr8	promoter	286	ANK1	EGR3_2	0.748493	0.0983385	0.0230816	0.0701778
rs4737021	chr8	promoter	286	ANK1	HINFP_2	0.0225743	0.00207347	0.0231306	0.0702259
rs1137177	chr8	promoter	286	ANK1	NR4A2_1	0.529603	0.0287328	0.0231799	0.0702913
rs6989203	chr8	promoter	286	ANK1	FOXB1_2	0.333175	0.0609	0.0233318	0.0703831
rs475831	chr8	promoter	286	ANK1	ELF5_2	0.0577449	0.00604703	0.0235867	0.0706159
rs1137177	chr8	promoter	286	ANK1	SP3_1	0.0663571	0.284076	0.0236814	0.0707131
rs1137177	chr8	promoter	286	ANK1	REST_3	0.0214976	0.137911	0.0238019	0.0708211
rs6989203	chr8	promoter	286	ANK1	POU6F1_1	0.273299	0.0514443	0.0238574	0.0708699
rs4737021	chr8	promoter	286	ANK1	SP1_4	0.608984	0.10377	0.0238626	0.0708699
rs508419	chr8	promoter	286	ANK1	TBX15_2	0.00153755	0.0130969	0.0239723	0.0710284
rs4737021	chr8	promoter	286	ANK1	IRF5_2	0.0142781	0.123121	0.0240749	0.0711229
rs6989203	chr8	promoter	286	ANK1	POU4F1_1	0.155024	0.0279721	0.024099	0.0711701
rs4737021	chr8	promoter	286	ANK1	PAX2_2	0.0425715	0.391591	0.0241037	0.0711701
rs6989203	chr8	promoter	286	ANK1	REST_4	0.45311	0.0851192	0.0243516	0.0713605
rs6989203	chr8	promoter	286	ANK1	MEIS1_4	0.0692631	0.91613	0.0243637	0.0713605
rs508419	chr8	promoter	286	ANK1	ETS_disc7	0.149507	0.0326801	0.0243745	0.0713605
rs4737021	chr8	promoter	286	ANK1	TFAP4_3	0.221362	0.0301053	0.0245307	0.0715573
rs6989203	chr8	promoter	286	ANK1	TFAP2_disc1	0.0616343	0.00945381	0.0245912	0.0716041
rs508419	chr8	promoter	286	ANK1	ZNF524_1	0.0654751	0.472672	0.0246822	0.0716569
rs508419	chr8	promoter	286	ANK1	TCF3_1	0.102065	0.51278	0.0248053	0.0716786
rs4737021	chr8	promoter	286	ANK1	EP300_disc5	0.00793958	0.0477511	0.0248522	0.0717098
rs6989203	chr8	promoter	286	ANK1	IRF_disc2	0.0325633	0.00391188	0.0248675	0.0717098
rs508419	chr8	promoter	286	ANK1	E2F_disc3	0.20778	0.0233634	0.0248771	0.0717098
rs4737021	chr8	promoter	286	ANK1	FOXA2_1	0.0659655	0.535303	0.0249821	0.0718963
rs4737021	chr8	promoter	286	ANK1	RORA_1	0.0214349	0.231631	0.0249842	0.0718963
rs508419	chr8	promoter	286	ANK1	MEIS3_5	0.0250723	0.137982	0.0250891	0.0720143
rs475831	chr8	promoter	286	ANK1	ELF3_1	0.218295	0.0256173	0.0250963	0.0720143
rs1137177	chr8	promoter	286	ANK1	JDP2_2	0.939863	0.111615	0.0252682	0.0720785
rs475831	chr8	promoter	286	ANK1	TCF7L2_1	0.0842228	0.510854	0.0253344	0.0721339
rs508419	chr8	promoter	286	ANK1	TBR1_2	0.0160366	0.113662	0.0254381	0.0722118
rs6989203	chr8	promoter	286	ANK1	SOX8_7	0.00400559	0.030695	0.0254733	0.0722118
rs508419	chr8	promoter	286	ANK1	E2F1_16	0.420814	0.0649934	0.0254869	0.0722118
rs508419	chr8	promoter	286	ANK1	NFE2L1_1	0.0869532	0.743521	0.0255549	0.0722375
rs475831	chr8	promoter	286	ANK1	ETS_disc7	0.0968808	0.0214529	0.0256193	0.0722998
rs4737021	chr8	promoter	286	ANK1	OLIG2_2	0.912746	0.111328	0.0256378	0.0723056
rs4737021	chr8	promoter	286	ANK1	MAFK_3	0.55987	0.12262	0.0257295	0.072379
rs4737021	chr8	promoter	286	ANK1	E2F2_4	0.11491	0.498753	0.0257961	0.0724427
rs508419	chr8	promoter	286	ANK1	TFAP2A_10	0.137641	0.0387484	0.0258333	0.0724427
rs4737021	chr8	promoter	286	ANK1	NRF1_disc1	0.641451	0.0986185	0.025951	0.0725511
rs6989203	chr8	promoter	286	ANK1	FOXD3_1	0.690498	0.14341	0.0260358	0.0726052
rs1137177	chr8	promoter	286	ANK1	NR2F1_5	0.0104221	0.115269	0.026043	0.0726162
rs4737021	chr8	promoter	286	ANK1	OLIG1_1	0.368644	0.0432287	0.0261357	0.0727011
rs508419	chr8	promoter	286	ANK1	NR2F1_5	0.0521172	0.534042	0.0261676	0.0727312
rs1137177	chr8	promoter	286	ANK1	AR_2	0.140514	0.0247969	0.0261731	0.0727315
rs508419	chr8	promoter	286	ANK1	TFAP2A_2	0.456748	0.097329	0.0263137	0.0727416
rs6989203	chr8	promoter	286	ANK1	GCM_1	0.444116	0.0785267	0.0263328	0.0727416
rs6989203	chr8	promoter	286	ANK1	PAX2_3	0.0191824	0.200299	0.0263753	0.0727909
rs1137177	chr8	promoter	286	ANK1	ETS_disc9	0.0319591	0.203277	0.0264557	0.0728304
rs1137177	chr8	promoter	286	ANK1	HEY1_disc2	0.0238741	0.0818388	0.0264661	0.0728326
rs4737021	chr8	promoter	286	ANK1	MAFG_1	0.619867	0.132283	0.026679	0.0731143
rs475831	chr8	promoter	286	ANK1	EP300_disc4	0.0384754	0.00344929	0.0266977	0.0731157
rs1137177	chr8	promoter	286	ANK1	NFE2_2	0.0720167	0.488967	0.0267993	0.073231
rs4737021	chr8	promoter	286	ANK1	BARHL2_4	0.120479	0.694376	0.0269072	0.0733684
rs1137177	chr8	promoter	286	ANK1	CEBPG_1	0.488186	0.109272	0.02693	0.0733684
rs475831	chr8	promoter	286	ANK1	GATA_disc3	0.0916503	0.737983	0.0269794	0.0734201
rs508419	chr8	promoter	286	ANK1	PKNOX2_3	0.0221186	0.113911	0.0270198	0.0734326
rs4737021	chr8	promoter	286	ANK1	NR3C1_2	0.0723249	0.418122	0.0272211	0.0736797
rs6989203	chr8	promoter	286	ANK1	HBP1_1	0.00903026	0.051708	0.0273592	0.0737993
rs4737021	chr8	promoter	286	ANK1	IRF_disc3	0.00108609	0.00748484	0.0273618	0.0737993
rs508419	chr8	promoter	286	ANK1	IRF_disc3	0.507258	0.0790385	0.0273626	0.0737993
rs4737021	chr8	promoter	286	ANK1	KLF4_1	0.510175	0.078096	0.0273706	0.0737993
rs6989203	chr8	promoter	286	ANK1	SOX14_1	0.0452689	0.00802521	0.0276285	0.0739753
rs6989203	chr8	promoter	286	ANK1	IRF1_1	0.224188	0.0254288	0.0278718	0.0743015
rs508419	chr8	promoter	286	ANK1	TBX1_3	0.00137183	0.0134624	0.0279094	0.0743268
rs6989203	chr8	promoter	286	ANK1	GATA1_1	0.0936926	0.905373	0.0279892	0.0743268
rs508419	chr8	promoter	286	ANK1	ATF3_disc1	0.0410427	0.321238	0.0280399	0.0743502
rs508419	chr8	promoter	286	ANK1	RARA_8	0.0632886	0.479875	0.0280818	0.074403
rs4737021	chr8	promoter	286	ANK1	ELF5_3	0.00326695	0.000359133	0.0282626	0.0745265
rs1137177	chr8	promoter	286	ANK1	OSR2_1	0.678759	0.0811094	0.0283513	0.0745501
rs4737021	chr8	promoter	286	ANK1	SMC3_disc3	0.517244	0.113834	0.028459	0.0745865
rs1137177	chr8	promoter	286	ANK1	TBX15_2	0.0831242	0.0105625	0.0285581	0.0746027
rs6989203	chr8	promoter	286	ANK1	AP1_6	0.0634287	0.0083464	0.0286439	0.0746208
rs508419	chr8	promoter	286	ANK1	RHOXF1_5	0.203028	0.0242612	0.0286894	0.0746208
rs6989203	chr8	promoter	286	ANK1	MEF2D_1	0.0666583	0.0106916	0.0287734	0.0746456
rs1137177	chr8	promoter	286	ANK1	ESRRA_1	0.5002	0.0810737	0.0288311	0.0746876
rs1137177	chr8	promoter	286	ANK1	TCF12_disc5	0.133217	0.0213457	0.0288541	0.0746895
rs6989203	chr8	promoter	286	ANK1	PRRX2_2	0.238868	0.0376398	0.0289328	0.0747701
rs475831	chr8	promoter	286	ANK1	STAT3_1	0.308623	0.058096	0.0289789	0.0747793
rs6989203	chr8	promoter	286	ANK1	FOXK1_1	0.694725	0.144784	0.0290826	0.0748514
rs508419	chr8	promoter	286	ANK1	RORA_3	0.0366917	0.403915	0.0291868	0.0749056
rs508419	chr8	promoter	286	ANK1	BHLHE40_1	0.0769283	0.489236	0.0292488	0.0749646
rs6989203	chr8	promoter	286	ANK1	HOXA7_2	0.304734	0.0543208	0.029263	0.0749646
rs508419	chr8	promoter	286	ANK1	TFAP4_1	0.499157	0.118915	0.0292983	0.0749646
rs475831	chr8	promoter	286	ANK1	GCM1_1	0.469306	0.0714016	0.0294255	0.0750536
rs508419	chr8	promoter	286	ANK1	MEIS2_1	0.0853324	0.45419	0.0295081	0.0751775
rs508419	chr8	promoter	286	ANK1	GRHL1_1	0.407154	0.0765086	0.029678	0.0753086
rs6989203	chr8	promoter	286	ANK1	TEAD1_1	0.047389	0.496129	0.0297166	0.0753297
rs6989203	chr8	promoter	286	ANK1	MYC_disc3	0.0556912	0.00857292	0.0297297	0.0753299
rs508419	chr8	promoter	286	ANK1	MZF1_4	0.311463	0.0266562	0.0297821	0.0753962
rs4737021	chr8	promoter	286	ANK1	ZFX_1	0.702067	0.13651	0.0297852	0.0753962
rs6989203	chr8	promoter	286	ANK1	DMRTC2_1	0.324445	0.0359648	0.0302014	0.0757739
rs6989203	chr8	promoter	286	ANK1	SOX7_1	0.0928006	0.0229999	0.0302745	0.0757795
rs508419	chr8	promoter	286	ANK1	RXRA_8	0.0114737	0.0827834	0.0303609	0.0758917
rs508419	chr8	promoter	286	ANK1	NFIA_1	0.152134	0.0248265	0.0304245	0.0759566
rs6989203	chr8	promoter	286	ANK1	FOXO3_5	0.567713	0.0684203	0.030485	0.0759781
rs508419	chr8	promoter	286	ANK1	TBX20_3	0.00815079	0.0540187	0.0305095	0.0759906
rs6989203	chr8	promoter	286	ANK1	ATF1_3	0.417456	0.0509127	0.0305758	0.0760732
rs1137177	chr8	promoter	286	ANK1	GMEB2_1	0.00996834	0.257597	0.0305835	0.0760791
rs508419	chr8	promoter	286	ANK1	PPARA_2	0.0222574	0.209038	0.0307025	0.0762392
rs6989203	chr8	promoter	286	ANK1	MAFK_5	0.434858	0.0795839	0.0307098	0.0762392
rs4737021	chr8	promoter	286	ANK1	NHLH1_3	0.0404423	0.00619348	0.0307676	0.0762886
rs4737021	chr8	promoter	286	ANK1	TEAD2_1	0.629634	0.130972	0.0308175	0.0763361
rs508419	chr8	promoter	286	ANK1	ATF3_disc4	0.252954	0.032893	0.030823	0.0763403
rs4737021	chr8	promoter	286	ANK1	HNF1_1	0.195461	0.784417	0.0309272	0.0764195
rs475831	chr8	promoter	286	ANK1	E2F1_4	0.341843	0.0453362	0.0309628	0.0764385
rs508419	chr8	promoter	286	ANK1	ZNF784_1	0.0192668	0.132395	0.030975	0.0764516
rs475831	chr8	promoter	286	ANK1	ETV6_1	0.00166803	0.000291373	0.0312768	0.0766414
rs6989203	chr8	promoter	286	ANK1	SOX8_8	0.00878618	0.0543955	0.0314431	0.0768023
rs475831	chr8	promoter	286	ANK1	FOXO3_6	0.48417	0.0833654	0.0315053	0.0768319
rs6989203	chr8	promoter	286	ANK1	SRY_4	0.017129	0.00337675	0.03152	0.0768319
rs508419	chr8	promoter	286	ANK1	MYC::MAX_4	0.154926	0.730914	0.0315969	0.0769487
rs1137177	chr8	promoter	286	ANK1	RHOXF1_2	0.560113	0.0911789	0.0316623	0.0769768
rs6989203	chr8	promoter	286	ANK1	NKX6-1_2	0.116213	0.0253839	0.0316719	0.0769768
rs1137177	chr8	promoter	286	ANK1	CREB3L2_1	0.0294091	0.185226	0.0316745	0.0769768
rs508419	chr8	promoter	286	ANK1	MYC::MAX_3	0.434653	0.0564395	0.0319343	0.0771442
rs475831	chr8	promoter	286	ANK1	TATA_disc7	0.107412	0.0243126	0.0319674	0.0771558
rs1137177	chr8	promoter	286	ANK1	BCL_disc10	0.059711	0.305553	0.0319676	0.0771558
rs1137177	chr8	promoter	286	ANK1	HNF4A_15	0.793494	0.150077	0.0320706	0.0772779
rs4737021	chr8	promoter	286	ANK1	FIGLA_1	0.489301	0.0573696	0.0321391	0.0773347
rs1137177	chr8	promoter	286	ANK1	SOX9_8	0.50359	0.133248	0.0321553	0.0773413
rs508419	chr8	promoter	286	ANK1	TBX20_1	0.00282104	0.0164933	0.0322275	0.077419
rs475831	chr8	promoter	286	ANK1	EGR1_disc5	0.30862	0.0644094	0.032234	0.077419
rs4737021	chr8	promoter	286	ANK1	REST_disc8	0.313003	0.0923922	0.0322573	0.077419
rs4737021	chr8	promoter	286	ANK1	SPIB_1	0.0705082	0.81383	0.032258	0.077419
rs475831	chr8	promoter	286	ANK1	SOX8_6	0.0441286	0.318901	0.032269	0.077419
rs4737021	chr8	promoter	286	ANK1	TCF12_1	0.164944	0.0292444	0.0323674	0.0774671
rs4737021	chr8	promoter	286	ANK1	HOXD9_3	0.101627	0.920512	0.0323821	0.0774671
rs1137177	chr8	promoter	286	ANK1	SOX21_2	0.366618	0.0717777	0.0324339	0.0774704
rs1137177	chr8	promoter	286	ANK1	TBX20_3	0.083128	0.013316	0.0325625	0.0775732
rs508419	chr8	promoter	286	ANK1	ID4_1	0.0159182	0.119984	0.0325872	0.0775856
rs508419	chr8	promoter	286	ANK1	NKX3-2_2	0.13213	0.698322	0.0328101	0.0776339
rs6989203	chr8	promoter	286	ANK1	POU6F2_2	0.81244	0.164296	0.0328298	0.0776339
rs6989203	chr8	promoter	286	ANK1	BCL_disc5	0.0597663	0.384382	0.0328765	0.0776339
rs508419	chr8	promoter	286	ANK1	TFAP2A_7	0.215236	0.0516996	0.0328948	0.0776339
rs1137177	chr8	promoter	286	ANK1	KLF14_1	0.0721125	0.355135	0.0329308	0.0776339
rs4737021	chr8	promoter	286	ANK1	EP300_disc8	0.0865619	0.0143371	0.0329381	0.0776339
rs508419	chr8	promoter	286	ANK1	MYF6_1	0.0532628	0.32029	0.0330037	0.0776504
rs1137177	chr8	promoter	286	ANK1	CHD2_disc1	0.0976063	0.00974554	0.0331169	0.0777516
rs4737021	chr8	promoter	286	ANK1	STAT1_3	0.00927984	0.0924333	0.0331768	0.0778012
rs1137177	chr8	promoter	286	ANK1	ATF4_2	0.0397789	0.298385	0.0332404	0.0778326
rs4737021	chr8	promoter	286	ANK1	ZEB1_5	0.612243	0.0594269	0.0333035	0.0778711
rs6989203	chr8	promoter	286	ANK1	SOX8_3	0.00682766	0.035214	0.033393	0.0779749
rs475831	chr8	promoter	286	ANK1	TBX20_5	0.590412	0.154233	0.033408	0.0779749
rs508419	chr8	promoter	286	ANK1	TFAP2A_9	0.199674	0.0371382	0.0334684	0.0779806
rs6989203	chr8	promoter	286	ANK1	HOXD11_2	0.172547	0.0399734	0.0335028	0.0779806
rs4737021	chr8	promoter	286	ANK1	BARHL1_4	0.111614	0.593648	0.0335285	0.0779806
rs6989203	chr8	promoter	286	ANK1	FOXJ3_1	0.778391	0.159221	0.0337822	0.0781169
rs508419	chr8	promoter	286	ANK1	ETS_disc3	0.306335	0.0395808	0.0338849	0.0781631
rs4737021	chr8	promoter	286	ANK1	ZNF143_2	0.0813775	0.0142454	0.0339212	0.0781631
rs6989203	chr8	promoter	286	ANK1	SOX14_4	0.18627	0.849676	0.0339779	0.0781631
rs6989203	chr8	promoter	286	ANK1	ARID5A_1	0.110998	0.0231764	0.0340181	0.0781631
rs4737021	chr8	promoter	286	ANK1	E2F_disc3	0.96034	0.12756	0.0340424	0.0781631
rs508419	chr8	promoter	286	ANK1	EOMES_2	0.0126626	0.079735	0.0341158	0.0782082
rs475831	chr8	promoter	286	ANK1	E2F1_11	0.0672169	0.00806168	0.0343824	0.0784393
rs6989203	chr8	promoter	286	ANK1	NKX6-1_3	0.212508	0.0455104	0.0345312	0.0785034
rs475831	chr8	promoter	286	ANK1	ZBTB7A_disc2	0.332389	0.057342	0.0345327	0.0785034
rs6989203	chr8	promoter	286	ANK1	GATA4_1	0.350536	0.0650494	0.0346461	0.0785837
rs1137177	chr8	promoter	286	ANK1	MYC_disc9	0.0877451	0.321637	0.0346579	0.0785878
rs475831	chr8	promoter	286	ANK1	MYC_disc8	0.523039	0.0461702	0.0347203	0.078623
rs4737021	chr8	promoter	286	ANK1	STAT6_1	0.0297869	0.273668	0.0350431	0.078806
rs508419	chr8	promoter	286	ANK1	ZBTB14_2	0.142126	0.0157319	0.0350557	0.0788103
rs475831	chr8	promoter	286	ANK1	ARNT_3	0.0771097	0.4742	0.0350948	0.0788503
rs508419	chr8	promoter	286	ANK1	MNT_1	0.12058	0.896268	0.0351076	0.0788506
rs6989203	chr8	promoter	286	ANK1	SOX12_1	0.119551	0.0184664	0.0351349	0.0788526
rs6989203	chr8	promoter	286	ANK1	GATA_2	0.0151322	0.135598	0.0351352	0.0788526
rs4737021	chr8	promoter	286	ANK1	FOXG1_1	0.102394	0.4784	0.0352666	0.0790037
rs475831	chr8	promoter	286	ANK1	ETV7_1	0.0159997	0.00266313	0.0352865	0.0790143
rs6989203	chr8	promoter	286	ANK1	POU4F2_1	0.140584	0.0304942	0.0353087	0.0790166
rs4737021	chr8	promoter	286	ANK1	TCF3_6	0.469941	0.0719421	0.0353558	0.0790284
rs508419	chr8	promoter	286	ANK1	MEIS2_4	0.0116124	0.0633081	0.0353893	0.0790326
rs6989203	chr8	promoter	286	ANK1	POU3F2_2	0.358844	0.106099	0.0353951	0.0790326
rs1137177	chr8	promoter	286	ANK1	SOX2_2	0.626308	0.0690812	0.0354853	0.0790626
rs508419	chr8	promoter	286	ANK1	CHD2_disc2	0.432205	0.0468645	0.0354857	0.0790626
rs1137177	chr8	promoter	286	ANK1	CREB1_7	0.000312197	0.00302461	0.0355151	0.0790884
rs6989203	chr8	promoter	286	ANK1	GATA2_2	0.0277157	0.390479	0.0355377	0.0791132
rs508419	chr8	promoter	286	ANK1	NKX3-1_3	0.0752809	0.460804	0.0355964	0.0791872
rs6989203	chr8	promoter	286	ANK1	FOXC2_1	0.0604198	0.0114649	0.0356237	0.0791952
rs508419	chr8	promoter	286	ANK1	TCF7L2_disc2	0.101895	0.567512	0.0357097	0.0791976
rs4737021	chr8	promoter	286	ANK1	FOXG1_4	0.00232065	0.0218697	0.0357834	0.0792186
rs508419	chr8	promoter	286	ANK1	AR_7	0.163643	0.810268	0.0361619	0.0794264
rs4737021	chr8	promoter	286	ANK1	GFI1_2	0.362554	0.053525	0.0362068	0.0794894
rs508419	chr8	promoter	286	ANK1	ARNT_2	0.0537182	0.390967	0.0362549	0.0794894
rs4737021	chr8	promoter	286	ANK1	ASCL2_2	0.17591	0.0261728	0.0363	0.0794894
rs508419	chr8	promoter	286	ANK1	TFAP2C_1	0.098008	0.0186449	0.0366634	0.0796431
rs475831	chr8	promoter	286	ANK1	YY1_disc4	0.0953117	0.0295276	0.0367339	0.0796431
rs4737021	chr8	promoter	286	ANK1	BCL_disc1	0.0068939	0.000599897	0.0369503	0.079812
rs508419	chr8	promoter	286	ANK1	SREBF1_1	0.0822916	0.525483	0.036984	0.0798267
rs475831	chr8	promoter	286	ANK1	TCF7L2_disc2	0.134753	0.646055	0.0370088	0.0798451
rs4737021	chr8	promoter	286	ANK1	RELA_2	0.0882951	0.401348	0.0370488	0.079881
rs6989203	chr8	promoter	286	ANK1	CDC5L_1	0.31553	0.0344972	0.0370534	0.079881
rs6989203	chr8	promoter	286	ANK1	GATA1_4	0.00556096	0.192075	0.0371316	0.0799464
rs6989203	chr8	promoter	286	ANK1	VAX2_1	0.332637	0.083993	0.0371516	0.0799612
rs1137177	chr8	promoter	286	ANK1	FOXJ3_3	0.652351	0.12598	0.0372206	0.0799884
rs6989203	chr8	promoter	286	ANK1	PAX4_2	0.111249	0.0189277	0.0375517	0.0801381
rs1137177	chr8	promoter	286	ANK1	NR2C2_disc2	0.794952	0.0998446	0.037668	0.0802105
rs4737021	chr8	promoter	286	ANK1	RAD21_disc6	0.66183	0.21694	0.037689	0.0802105
rs508419	chr8	promoter	286	ANK1	MAFG_1	0.705632	0.17765	0.0378812	0.0802425
rs475831	chr8	promoter	286	ANK1	PPARG_2	0.078909	0.346544	0.0378864	0.0802425
rs508419	chr8	promoter	286	ANK1	RARG_3	0.022452	0.104977	0.0379483	0.0802442
rs508419	chr8	promoter	286	ANK1	CREB1_1	0.0662828	0.493326	0.0380833	0.0802775
rs6989203	chr8	promoter	286	ANK1	FOXD3_3	0.0587162	0.0116644	0.0380954	0.0802882
rs475831	chr8	promoter	286	ANK1	ZIC1_1	0.0782708	0.0121278	0.0382172	0.0803085
rs6989203	chr8	promoter	286	ANK1	HMGN3_disc1	0.0523112	0.00758646	0.0382336	0.0803085
rs475831	chr8	promoter	286	ANK1	NR6A1_1	0.0441661	0.399126	0.0383113	0.0803231
rs1137177	chr8	promoter	286	ANK1	PPARG_4	0.675146	0.138223	0.0385221	0.0804397
rs1137177	chr8	promoter	286	ANK1	CTCF_disc1	0.985891	0.21195	0.0385279	0.0804397
rs4737021	chr8	promoter	286	ANK1	MAFB_4	0.344917	0.0626242	0.0385339	0.0804397
rs508419	chr8	promoter	286	ANK1	PAX5_disc3	0.037976	0.180099	0.0385567	0.0804397
rs4737021	chr8	promoter	286	ANK1	EGR4_1	0.570707	0.131266	0.0387905	0.0804698
rs1137177	chr8	promoter	286	ANK1	FOXG1_2	0.181514	0.0283798	0.0388617	0.0805395
rs6989203	chr8	promoter	286	ANK1	FOXL1_2	0.147752	0.0170224	0.0389045	0.0805508
rs6989203	chr8	promoter	286	ANK1	ZNF143_disc2	0.0396957	0.34918	0.0390626	0.0806788
rs1137177	chr8	promoter	286	ANK1	E2F1_13	0.030921	0.139249	0.0391802	0.0806881
rs508419	chr8	promoter	286	ANK1	RXRA_1	0.094705	0.591956	0.0391947	0.0806881
rs475831	chr8	promoter	286	ANK1	KLF4_1	0.0590565	0.0107948	0.0393124	0.0807145
rs6989203	chr8	promoter	286	ANK1	SRY_1	0.0764044	0.842036	0.0393711	0.0807629
rs508419	chr8	promoter	286	ANK1	RARG_8	0.12421	0.71431	0.0394352	0.0808308
rs475831	chr8	promoter	286	ANK1	IKZF2_2	0.68703	0.11359	0.0394671	0.0808308
rs1137177	chr8	promoter	286	ANK1	SOX14_2	0.320171	0.0510943	0.039496	0.0808308
rs1137177	chr8	promoter	286	ANK1	CREB1_6	0.000669897	0.00445815	0.0395129	0.0808308
rs4737021	chr8	promoter	286	ANK1	ZNF263_disc1	0.314719	0.0836997	0.0397271	0.0809863
rs508419	chr8	promoter	286	ANK1	CUX1_3	0.140074	0.962474	0.0397771	0.0809863
rs475831	chr8	promoter	286	ANK1	STAT1_1	0.287875	0.0348029	0.0397816	0.0809863
rs4737021	chr8	promoter	286	ANK1	ZBTB33_1	0.624794	0.141591	0.039811	0.0809921
rs4737021	chr8	promoter	286	ANK1	KLF14_1	0.548224	0.116376	0.0398234	0.0809921
rs6989203	chr8	promoter	286	ANK1	AP1_disc9	0.326863	0.0388157	0.0398303	0.0809921
rs1137177	chr8	promoter	286	ANK1	XBP1_2	0.0213257	0.118326	0.0398476	0.0809944
rs508419	chr8	promoter	286	ANK1	E2F1_15	0.356313	0.0652588	0.0400351	0.0810446
rs475831	chr8	promoter	286	ANK1	HNF4_disc5	0.0701464	0.465152	0.0400476	0.0810446
rs508419	chr8	promoter	286	ANK1	HSF4_1	0.852254	0.13828	0.0400478	0.0810446
rs508419	chr8	promoter	286	ANK1	TFAP2C_3	0.23686	0.0540625	0.0403002	0.0810984
rs6989203	chr8	promoter	286	ANK1	MYC_disc4	0.741027	0.130778	0.040421	0.0812599
rs4737021	chr8	promoter	286	ANK1	TFAP4_5	0.43967	0.0715784	0.0404402	0.0812684
rs4737021	chr8	promoter	286	ANK1	IRF4_1	0.0188873	0.0977615	0.0404589	0.0812776
rs508419	chr8	promoter	286	ANK1	E2F4_1	0.672213	0.135866	0.0405327	0.0813003
rs1137177	chr8	promoter	286	ANK1	ATF2_2	0.083708	0.489812	0.0405796	0.0813011
rs6989203	chr8	promoter	286	ANK1	HDAC2_disc3	0.432809	0.108604	0.0406019	0.0813028
rs508419	chr8	promoter	286	ANK1	PKNOX1_2	0.0304693	0.144644	0.04062	0.0813028
rs4737021	chr8	promoter	286	ANK1	SIN3A_disc6	0.561313	0.189525	0.040622	0.0813028
rs4737021	chr8	promoter	286	ANK1	BHLHA15_1	0.741399	0.110085	0.0406467	0.0813089
rs508419	chr8	promoter	286	ANK1	RARA_6	0.0239509	0.0990894	0.0406608	0.0813089
rs475831	chr8	promoter	286	ANK1	SOX10_9	0.628742	0.190956	0.040707	0.0813291
rs6989203	chr8	promoter	286	ANK1	FOXL1_3	0.58413	0.116778	0.0407637	0.0813291
rs4737021	chr8	promoter	286	ANK1	BARHL2_7	0.167721	0.793872	0.040812	0.0813291
rs4737021	chr8	promoter	286	ANK1	ZSCAN16_1	0.288055	0.0522552	0.0408708	0.0813291
rs1137177	chr8	promoter	286	ANK1	TBX5_1	0.641978	0.0941558	0.0410601	0.0813291
rs475831	chr8	promoter	286	ANK1	GLIS1_1	0.872609	0.237054	0.041357	0.0814162
rs4737021	chr8	promoter	286	ANK1	YY1_disc5	0.652424	0.216729	0.0413605	0.0814162
rs1137177	chr8	promoter	286	ANK1	YY1_4	0.00918105	0.0546517	0.041449	0.0814209
rs6989203	chr8	promoter	286	ANK1	MYBL2_1	0.0472382	0.266485	0.0414658	0.0814209
rs508419	chr8	promoter	286	ANK1	TCF3_3	0.0499774	0.248992	0.0415069	0.0814388
rs4737021	chr8	promoter	286	ANK1	MAFK_5	0.373502	0.0795839	0.0415346	0.0814531
rs475831	chr8	promoter	286	ANK1	ETV4_1	0.305211	0.0544172	0.0415551	0.0814571
rs4737021	chr8	promoter	286	ANK1	GRHL1_3	0.0450353	0.234689	0.0417035	0.0815975
rs1137177	chr8	promoter	286	ANK1	POU5F1_2	0.978036	0.211465	0.0417489	0.0815975
rs475831	chr8	promoter	286	ANK1	MYC_disc9	0.0231956	0.00709163	0.0420169	0.0817802
rs475831	chr8	promoter	286	ANK1	RUNX_2	0.883774	0.218225	0.0420711	0.081784
rs508419	chr8	promoter	286	ANK1	PKNOX2_1	0.0563996	0.280228	0.0420861	0.081784
rs508419	chr8	promoter	286	ANK1	RXRB_1	0.00881328	0.0485758	0.0422043	0.0818085
rs508419	chr8	promoter	286	ANK1	SMC3_disc3	0.333324	0.0979157	0.042232	0.0818085
rs6989203	chr8	promoter	286	ANK1	LMX1B_2	0.17984	0.0286867	0.0422691	0.0818544
rs1137177	chr8	promoter	286	ANK1	TBX5_4	0.053585	0.0085129	0.0424492	0.0819308
rs508419	chr8	promoter	286	ANK1	NFIX_1	0.081986	0.0201602	0.0425348	0.0819444
rs6989203	chr8	promoter	286	ANK1	EN1_3	0.281935	0.0619276	0.0427195	0.0820163
rs4737021	chr8	promoter	286	ANK1	TFAP4_4	0.498626	0.0626562	0.0428467	0.0821538
rs6989203	chr8	promoter	286	ANK1	POU2F2_5	0.087384	0.0143741	0.0429504	0.0821882
rs475831	chr8	promoter	286	ANK1	ZNF281_1	0.415331	0.12268	0.042981	0.0821989
rs508419	chr8	promoter	286	ANK1	TCF3_4	0.130243	0.740211	0.0430398	0.0821989
rs475831	chr8	promoter	286	ANK1	SP8_1	0.137015	0.0272613	0.0431048	0.0822074
rs508419	chr8	promoter	286	ANK1	HNF4A_12	0.0274609	0.116737	0.0434462	0.0825236
rs4737021	chr8	promoter	286	ANK1	NEUROD2_1	0.697862	0.0865028	0.0435051	0.0825237
rs6989203	chr8	promoter	286	ANK1	IRF_1	0.188316	0.83488	0.0436761	0.0826723
rs4737021	chr8	promoter	286	ANK1	EP300_1	0.114004	0.672885	0.0438398	0.0826945
rs1137177	chr8	promoter	286	ANK1	ATF7_1	0.0118141	0.0757269	0.0438481	0.0826945
rs4737021	chr8	promoter	286	ANK1	RELA_1	0.0770473	0.304236	0.0441199	0.0827895
rs1137177	chr8	promoter	286	ANK1	OSR1_1	0.756505	0.131096	0.0441235	0.0827895
rs4737021	chr8	promoter	286	ANK1	TCF3_2	0.74281	0.180369	0.0443097	0.0828616
rs4737021	chr8	promoter	286	ANK1	HSFY2_1	0.964334	0.173675	0.044369	0.0828896
rs6989203	chr8	promoter	286	ANK1	MEF2A_5	0.137827	0.0312772	0.0445166	0.0829163
rs1137177	chr8	promoter	286	ANK1	SOX7_3	0.531451	0.132138	0.0445198	0.0829163
rs1137177	chr8	promoter	286	ANK1	E2F1_5	0.0878279	0.530663	0.0445251	0.0829163
rs508419	chr8	promoter	286	ANK1	NR1H4_3	0.0504561	0.337703	0.0446465	0.0829588
rs508419	chr8	promoter	286	ANK1	MAFK_3	0.779273	0.199387	0.044747	0.0829788
rs1137177	chr8	promoter	286	ANK1	E2F1_9	0.10676	0.421034	0.0447652	0.0829788
rs508419	chr8	promoter	286	ANK1	NR3C1_disc3	0.202286	0.00888503	0.0448548	0.083076
rs508419	chr8	promoter	286	ANK1	TGIF2LX_1	0.0353872	0.182026	0.0449278	0.0831076
rs508419	chr8	promoter	286	ANK1	BCL_disc5	0.115353	0.674193	0.0449281	0.0831076
rs1137177	chr8	promoter	286	ANK1	TGIF1_2	0.252673	0.0512961	0.0451498	0.0832465
rs475831	chr8	promoter	286	ANK1	SP1_3	0.0140009	0.00262445	0.0453473	0.0833101
rs475831	chr8	promoter	286	ANK1	ELK1_6	0.215946	0.0474059	0.0454362	0.0833445
rs508419	chr8	promoter	286	ANK1	MYOD1_2	0.0808278	0.499469	0.0454492	0.0833445
rs475831	chr8	promoter	286	ANK1	ZNF143_1	0.103481	0.538025	0.0455098	0.0833445
rs508419	chr8	promoter	286	ANK1	RXRA_disc3	0.147777	0.8199	0.0455407	0.0833445
rs508419	chr8	promoter	286	ANK1	E2F_disc7	0.118459	0.0249516	0.0455819	0.083356
rs6989203	chr8	promoter	286	ANK1	SOX8_1	0.0808865	0.0194772	0.0456061	0.0833684
rs508419	chr8	promoter	286	ANK1	HMX3_1	0.116425	0.535032	0.0457195	0.0834478
rs4737021	chr8	promoter	286	ANK1	STAT5A_3	0.0466203	0.274633	0.0460501	0.0836662
rs508419	chr8	promoter	286	ANK1	RXRA_3	0.0144041	0.108355	0.0461626	0.0836662
rs508419	chr8	promoter	286	ANK1	HSF1_4	0.775013	0.152915	0.0461851	0.0836662
rs4737021	chr8	promoter	286	ANK1	HNF4_disc5	0.0743598	0.456849	0.0463623	0.0837456
rs475831	chr8	promoter	286	ANK1	IRF5_1	0.266813	0.0515737	0.0464811	0.0838166
rs475831	chr8	promoter	286	ANK1	NHLH1_1	0.723287	0.226358	0.046526	0.0838407
rs4737021	chr8	promoter	286	ANK1	SRY_8	0.174502	0.638475	0.0466248	0.0839459
rs475831	chr8	promoter	286	ANK1	KLF7_1	0.145648	0.034263	0.0466749	0.0839932
rs1137177	chr8	promoter	286	ANK1	ATF1_4	0.0104582	0.0537318	0.0467289	0.0840171
rs475831	chr8	promoter	286	ANK1	TEAD1_1	0.719449	0.0992407	0.0467834	0.0840653
rs1137177	chr8	promoter	286	ANK1	HEY2_1	0.130673	0.572279	0.0468396	0.0840936
rs1137177	chr8	promoter	286	ANK1	ARNT_1	0.268766	0.0518286	0.0469704	0.0841112
rs508419	chr8	promoter	286	ANK1	E2F1_18	0.314455	0.073854	0.046998	0.0841388
rs4737021	chr8	promoter	286	ANK1	STAT1_1	0.0757218	0.436316	0.0470418	0.0841492
rs4737021	chr8	promoter	286	ANK1	E2F4_4	0.0404873	0.172736	0.0471447	0.0841892
rs508419	chr8	promoter	286	ANK1	RBPJ_2	0.081929	0.62404	0.047164	0.0841977
rs4737021	chr8	promoter	286	ANK1	DMRTA2_1	0.0236707	0.109113	0.0472746	0.0842197
rs475831	chr8	promoter	286	ANK1	SP1_4	0.0559523	0.0135833	0.0473281	0.0842733
rs6989203	chr8	promoter	286	ANK1	NKX2-5_4	0.44028	0.0306018	0.0473549	0.0843015
rs6989203	chr8	promoter	286	ANK1	FOXI1_3	0.406056	0.0512895	0.0473639	0.0843099
rs1137177	chr8	promoter	286	ANK1	RFX3_1	0.244809	0.0627567	0.0474413	0.0843159
rs4737021	chr8	promoter	286	ANK1	KLF7_1	0.683991	0.162597	0.0477409	0.084438
rs1137177	chr8	promoter	286	ANK1	NR3C1_1	0.504117	0.133851	0.0479075	0.0845204
rs508419	chr8	promoter	286	ANK1	E2F1_4	0.623778	0.130933	0.0479426	0.0845204
rs1137177	chr8	promoter	286	ANK1	FOXC1_1	0.168771	0.585536	0.0480845	0.0845515
rs475831	chr8	promoter	286	ANK1	PBX3_disc1	0.588117	0.109412	0.048108	0.0845515
rs4737021	chr8	promoter	286	ANK1	RUNX1_5	0.154115	0.635957	0.048199	0.0845757
rs475831	chr8	promoter	286	ANK1	RUNX_1	0.815581	0.167787	0.0482132	0.0845757
rs4737021	chr8	promoter	286	ANK1	BDP1_disc3	0.649473	0.207548	0.048448	0.084657
rs4737021	chr8	promoter	286	ANK1	YY1_disc4	0.335711	0.121973	0.0487633	0.0848468
rs1137177	chr8	promoter	286	ANK1	SRY_5	0.361263	0.0903121	0.0488416	0.0848773
rs1137177	chr8	promoter	286	ANK1	SOX8_4	0.329982	0.0832016	0.0489274	0.0848773
rs1137177	chr8	promoter	286	ANK1	E2F3_1	0.121531	0.504019	0.0489765	0.0849082
rs4737021	chr8	promoter	286	ANK1	MYC_disc9	0.573734	0.182877	0.0490103	0.0849461
rs6989203	chr8	promoter	286	ANK1	ESX1_1	0.442896	0.1235	0.0490558	0.0849545
rs1137177	chr8	promoter	286	ANK1	DOBOX4_1	0.905783	0.211006	0.0490685	0.0849545
rs4737021	chr8	promoter	286	ANK1	EHF_2	0.0157121	0.00323937	0.0491943	0.0850453
rs4737021	chr8	promoter	286	ANK1	EGR1_disc6	0.324886	0.0715123	0.0493285	0.085078
rs6989203	chr8	promoter	286	ANK1	MEF2_disc1	0.147997	0.0400287	0.0493366	0.0850853
rs475831	chr8	promoter	286	ANK1	ZBTB33_1	0.101595	0.402142	0.0496279	0.0852059
rs475831	chr8	promoter	286	ANK1	IRF5_3	0.230334	0.0356646	0.0498489	0.0852597
rs475831	chr8	promoter	286	ANK1	TFAP2C_8	0.184221	0.0416958	0.0498669	0.0852597
rs508419	chr8	promoter	286	ANK1	SMAD_2	0.513695	0.0781022	0.0498886	0.0852597
rs508419	chr8	promoter	286	ANK1	TBX20_5	0.219894	0.775749	0.0499277	0.0852943
rs475831	chr8	promoter	286	ANK1	CREB1_10	0.081833	0.558941	0.0499701	0.0853177
rs4737021	chr8	promoter	286	ANK1	SOX21_4	0.167687	0.857377	0.0500635	0.085355
rs4737021	chr8	promoter	286	ANK1	IRF5_3	0.00892725	0.0564776	0.0501627	0.0854117
rs4737021	chr8	promoter	286	ANK1	ZNF423_2	0.452754	0.134021	0.0502852	0.0854881
rs508419	chr8	promoter	286	ANK1	EGR4_1	0.0376406	0.144149	0.0503186	0.0855068
rs6989203	chr8	promoter	286	ANK1	FOXA2_2	0.717123	0.119694	0.0503537	0.085531
rs508419	chr8	promoter	286	ANK1	SPZ1_1	0.0660287	0.0176956	0.0504453	0.085531
rs4737021	chr8	promoter	286	ANK1	NRF1_2	0.559553	0.110384	0.0504951	0.085531
rs1137177	chr8	promoter	286	ANK1	RAD21_disc6	0.0112929	0.0295712	0.0505308	0.085572
rs6989203	chr8	promoter	286	ANK1	BCL_disc2	0.0294937	0.00409216	0.0506314	0.0856226
rs1137177	chr8	promoter	286	ANK1	CREB1_10	0.00131783	0.00882155	0.0508397	0.0857149
rs475831	chr8	promoter	286	ANK1	ZNF524_1	0.0433119	0.232244	0.0509149	0.0857681
rs1137177	chr8	promoter	286	ANK1	E2F1_4	0.162846	0.704517	0.050929	0.0857681
rs1137177	chr8	promoter	286	ANK1	TRIM28_disc2	0.121194	0.517385	0.0510292	0.0858325
rs6989203	chr8	promoter	286	ANK1	SOX17_4	0.00583595	0.0242378	0.0510472	0.0858325
rs1137177	chr8	promoter	286	ANK1	RHOXF1_1	0.605375	0.130754	0.0511315	0.0858325
rs508419	chr8	promoter	286	ANK1	NR2C2_disc2	0.000810952	0.00551473	0.0511327	0.0858325
rs508419	chr8	promoter	286	ANK1	NR2F6_2	0.00280446	0.0110367	0.0512168	0.0858325
rs4737021	chr8	promoter	286	ANK1	SPIC_1	0.028725	0.00544877	0.051249	0.0858325
rs508419	chr8	promoter	286	ANK1	E2F1_17	0.0903072	0.0215281	0.0513112	0.0858325
rs4737021	chr8	promoter	286	ANK1	OLIG2_1	0.523489	0.103964	0.0515392	0.0859231
rs1137177	chr8	promoter	286	ANK1	CREB3L1_1	0.0117359	0.0739732	0.0515605	0.0859231
rs6989203	chr8	promoter	286	ANK1	MEF2A_2	0.0308536	0.00815031	0.0521928	0.0862301
rs6989203	chr8	promoter	286	ANK1	FOXA_2	0.226105	0.0560708	0.052197	0.0862301
rs475831	chr8	promoter	286	ANK1	BRCA1_2	0.359442	0.0491262	0.0524149	0.0863172
rs508419	chr8	promoter	286	ANK1	MZF1_3	0.0320054	0.220891	0.0526089	0.086394
rs1137177	chr8	promoter	286	ANK1	CACD_2	0.103853	0.414452	0.0526654	0.0864431
rs1137177	chr8	promoter	286	ANK1	BPTF_1	0.604858	0.158442	0.0527376	0.086473
rs6989203	chr8	promoter	286	ANK1	HLX_1	0.0803839	0.0208755	0.053246	0.0866764
rs1137177	chr8	promoter	286	ANK1	E2F2_3	0.212753	0.695543	0.0532588	0.0866776
rs475831	chr8	promoter	286	ANK1	MYB_1	0.208105	0.0571265	0.0536088	0.0867584
rs4737021	chr8	promoter	286	ANK1	ZNF143_1	0.512891	0.110818	0.0537209	0.0868321
rs4737021	chr8	promoter	286	ANK1	NANOG_disc3	0.139042	0.0272366	0.0538978	0.0868563
rs1137177	chr8	promoter	286	ANK1	MEIS1::HOXA9_1	0.718875	0.193043	0.054041	0.0868711
rs508419	chr8	promoter	286	ANK1	SCRT2_1	0.600395	0.132382	0.054196	0.0869257
rs6989203	chr8	promoter	286	ANK1	SIX4_1	0.103697	0.576141	0.0545009	0.0871234
rs4737021	chr8	promoter	286	ANK1	RARG_7	0.079061	0.306959	0.0545348	0.0871408
rs508419	chr8	promoter	286	ANK1	TBX4_1	0.00124995	0.0084175	0.0545728	0.0871888
rs475831	chr8	promoter	286	ANK1	NFE2L2_2	0.0572313	0.513632	0.054667	0.0872542
rs508419	chr8	promoter	286	ANK1	MAFK_5	0.494948	0.120408	0.0549128	0.0873853
rs1137177	chr8	promoter	286	ANK1	SOX18_2	0.392837	0.0570807	0.0550051	0.0874099
rs6989203	chr8	promoter	286	ANK1	POU2F1_12	0.244618	0.0682123	0.0550178	0.0874099
rs475831	chr8	promoter	286	ANK1	ZBTB14_2	0.206415	0.0303815	0.0550193	0.0874099
rs4737021	chr8	promoter	286	ANK1	CREB_1	0.815531	0.0750115	0.0551057	0.0874099
rs508419	chr8	promoter	286	ANK1	ZEB1_1	0.0166704	0.103464	0.0551147	0.0874099
rs1137177	chr8	promoter	286	ANK1	SOX10_8	0.139782	0.0298474	0.0551166	0.0874099
rs475831	chr8	promoter	286	ANK1	ELF1_2	0.260526	0.0548909	0.0551875	0.0874516
rs475831	chr8	promoter	286	ANK1	CACD_2	0.0171812	0.00483501	0.0552641	0.0874628
rs4737021	chr8	promoter	286	ANK1	BCL_disc3	0.0523362	0.361666	0.0553224	0.0874776
rs508419	chr8	promoter	286	ANK1	HSF1_5	0.810539	0.164333	0.0553848	0.0875255
rs6989203	chr8	promoter	286	ANK1	FOXO1_3	0.729918	0.10499	0.0554276	0.0875561
rs6989203	chr8	promoter	286	ANK1	ARID3A_2	0.232248	0.0703634	0.0555068	0.0876065
rs1137177	chr8	promoter	286	ANK1	REST_disc5	0.140831	0.445652	0.0555606	0.0876081
rs475831	chr8	promoter	286	ANK1	IRF6_1	0.135239	0.0289009	0.0555739	0.0876081
rs4737021	chr8	promoter	286	ANK1	PHOX2B_2	0.180611	0.809526	0.0556611	0.0876596
rs508419	chr8	promoter	286	ANK1	TFAP2B_2	0.214512	0.058525	0.0557157	0.0876596
rs475831	chr8	promoter	286	ANK1	ATF3_disc3	0.074043	0.0143224	0.0557185	0.0876596
rs6989203	chr8	promoter	286	ANK1	ALX4_1	0.161696	0.0319447	0.0557573	0.0876707
rs6989203	chr8	promoter	286	ANK1	SOX11_1	0.100153	0.0211095	0.0557677	0.0876751
rs508419	chr8	promoter	286	ANK1	TBX2_2	0.00652639	0.0358487	0.0557859	0.0876751
rs508419	chr8	promoter	286	ANK1	NR2E1::NFIC_1	0.170546	0.0298175	0.0558101	0.0876751
rs6989203	chr8	promoter	286	ANK1	HESX1_1	0.356905	0.0707663	0.0558239	0.0876751
rs508419	chr8	promoter	286	ANK1	TBX21_2	0.00338006	0.0203059	0.0558472	0.0876875
rs6989203	chr8	promoter	286	ANK1	CUX1_7	0.00343753	0.0133848	0.0558717	0.0877146
rs1137177	chr8	promoter	286	ANK1	RORA_3	0.323736	0.0581644	0.0560551	0.08775
rs475831	chr8	promoter	286	ANK1	ELK1_3	0.0335419	0.202704	0.056271	0.0879069
rs475831	chr8	promoter	286	ANK1	CTCF_disc9	0.106261	0.0493883	0.0564036	0.0879069
rs6989203	chr8	promoter	286	ANK1	SOX15_1	0.201931	0.0550906	0.0567076	0.0880499
rs1137177	chr8	promoter	286	ANK1	ESRRA_5	0.525815	0.140396	0.0567802	0.0880773
rs475831	chr8	promoter	286	ANK1	SP1_2	0.0357456	0.0101651	0.0570043	0.0881247
rs6989203	chr8	promoter	286	ANK1	YY1_1	0.051918	0.213081	0.0571309	0.0882156
rs475831	chr8	promoter	286	ANK1	SRF_disc2	0.133949	0.0544411	0.0571712	0.0882156
rs508419	chr8	promoter	286	ANK1	PAX5_2	0.133729	0.347985	0.0572593	0.0882587
rs4737021	chr8	promoter	286	ANK1	PHOX2B_3	0.176017	0.762048	0.0573827	0.0883336
rs6989203	chr8	promoter	286	ANK1	FOXO3_1	0.579714	0.153748	0.0576298	0.0883745
rs475831	chr8	promoter	286	ANK1	MAF_2	0.153639	0.990929	0.0576664	0.088383
rs6989203	chr8	promoter	286	ANK1	MAFB_4	0.59475	0.161152	0.0576827	0.088383
rs4737021	chr8	promoter	286	ANK1	ETV5_1	0.00252496	0.000449771	0.0576857	0.088383
rs508419	chr8	promoter	286	ANK1	XBP1_3	0.0479226	0.288879	0.057723	0.0883888
rs475831	chr8	promoter	286	ANK1	ETS_disc4	0.232105	0.0421892	0.0577856	0.0883957
rs4737021	chr8	promoter	286	ANK1	SIN3A_disc7	0.36876	0.101366	0.0580437	0.0885065
rs508419	chr8	promoter	286	ANK1	MYC_disc1	0.0942345	0.439027	0.0582569	0.0885267
rs4737021	chr8	promoter	286	ANK1	EBF1_disc2	0.447136	0.153303	0.0582791	0.0885267
rs508419	chr8	promoter	286	ANK1	CTCF_disc5	0.241023	0.0776231	0.0583129	0.0885267
rs6989203	chr8	promoter	286	ANK1	FOXP3_1	0.182087	0.0562101	0.0585565	0.088627
rs1137177	chr8	promoter	286	ANK1	GATA_1	0.717368	0.110613	0.0587551	0.0886714
rs4737021	chr8	promoter	286	ANK1	REST_disc4	0.51436	0.178779	0.0588107	0.0886771
rs508419	chr8	promoter	286	ANK1	CLOCK::ARNTL_1	0.0669095	0.364047	0.0589	0.0886771
[truncated: 14,326 more rows]
